# Supplementary material for: Spatiotemporal effects of landscape structure on the trade-offs and synergies among ecosystem service functions in Yangtze River Economic Belt, China
Source: Research Square preprint supplement (doi:10.21203/rs.3.rs-5461061/v1), 2025-04-04
Supplement: Supplementary file 1 [file 2b89997baea8c48b5d934d92.docx]

**Spatiotemporal effects of landscape structure on the trade-offs and synergies among ecosystem service functions in Yangtze River Economic Belt, China**

**Appendix A. Estimation of ecosystem services**

**1 Carbon sequestration(CS)**

The carbon sequestration level of a region is usually measured by the total carbon storage.It depends on four carbon pools: aboveground biomass carbon storage, belowground biomass carbon storage, soil carbon storage, and litter carbon storage.1–4. The formula can be expressed as:

(1)

where *Cstord* refers to the total carbon stored, *Cabove* refers to the carbon stored in the aboveground biomass carbon pool, *Cbelow* refers to the carbon stored in the belowground biomass carbon pool, *Csoil* refers to the carbon stored in the litter carbon pool, *Cdead* refers the carbon stored of deadwood and soil carbon pool.

The InVEST Carbon model was used to estimate the carbon storage of a given LULC type. Due to the regional variation of carbon density data, this study obtained the carbon density data for YERB from existing literature (Table S1) Run the Carbon storage and sequestration model in inVEST software, import LULC data during the study period in the column of Current Land Use/Land Cover(Raster) in parameter setting, and import parameters according to Table S1 in the column of Carbon Pools5–7.

**Table S1**

The carbon stock parameters of different LULC types（Unit: t/ha）

| LULC type | C_above | C_below | C_soil | C_dead |
| --- | --- | --- | --- | --- |
| Farmland | 16.49 | 10.89 | 75.82 | 2.11 |
| Woodland | 30.14 | 6.03 | 100.15 | 2.78 |
| Grassland | 14.29 | 17.15 | 87.05 | 7.28 |
| Water body | 1.59 | 0 | 64.03 | 3.98 |
| Built-up land | 7.61 | 1.52 | 34.33 | 0 |
| Unused land | 10.36 | 2.07 | 34.32 | 0.96 |

To illuminate the spatial variations of carbon stocks for each land class, we calculated a coefficient based on vegetation cover to correct for the original carbon stocks in Eq. (1). This process is described as follows:

(2)

(3)

(4)

where *f* refers to the vegetation cover, *Fi* refers to the adjustment coefficient for the carbon stock of the pixel *i*, *fi* refers to the vegetation cover of the pixel *i*, ‾*f* refers to the vegetation cover of the pixel *i*, *Cia* is the carbon stock before adjustment and *Cib* is the adjusted carbon stock.

**2 Food supply（FS）**

Food production is a foundational provisioning service of ecosystem services, playing a crucial role in human survival and development. By calculating the proportion of individual arable land grid NDVI to the sum of administrative unit's arable land NDVI, multiplied by the total grain yield of the administrative unit, the grain production at the grid scale is obtained 8–10. The formula for calculating food production services is as follows:

(5)

(6)

Where *GP*i is the food production of the ith cultivatedland grid, *GP*t is the total food production for the entire study area, nrepresents the total number grids of cultivated land in the study area;and *NDVli*, is the annual *NDVl* value of the ith cultivated land grid. Theterms *NDVlmax* and *NDVlmin* represent the maximum and minimumannual *NDVl* values of the cultivated land for the study area, respectively.

**3 Habitat quality（HQ）**

The Habitat Quality module of InVEST is an invaluable tool for evaluating and analyzing the ecological health and quality of specific regions. Habitat quality assesses the landscape's connectivity and its ability to supply vital resources for organism growth and survival, offering valuable insights into the overall environmental health and ecological system performance. The habitat quality index ranges from 0 to 1, with higher values indicating better habitat quality 11,12. The calculation formula is as follows:

(7)

where *HQIxj* denotes the habitat quality index of the jth LULC type in each xgrid; *Hj* denotes the habitat suitability of the jth land use type, k denotes the half-saturation constant, assumed as 0.5 in this study, and *HRxj* denotes the habitat degradation degree of the jth LULC type in each xgrid.

(8)

where *R* denotes the total number of threat factors, *Yr* denotes the number of units in the threat layer on the LULC, *wr* denotes the relative weight of threat factor *r*; *ry* denotes whether grid *y* is a threat grid, *irxy* denotes the impact of threat source *r* in grid *x* on habitat *y*, *βx* denotes the reachable level of grid *x*; and *Sjr* denotes the sensitivity of LULC type *j* to threat factor *r*.

Referring to the results of existing studies and an expert scoring system 13,14. We consider farmland, rural settlements, urban land, transportation infrastructure, and unused land as threat factors, and establish the impact distance and weight of each threat factor based on the actual context (Table S2), and habitat suitability of habitat types and sensitivity of different habitat types to threat factors (Table S3). The habitat quality model is run in inVEST software. LULC Data during the study period is imported in the column of Current Land Cover(Raster) in parameter setting, and parameters in Table S2 are imported in the column of Threats Data. Import parameters according to Table S3 in the Sensitivity of Land Cover Types to Each Threat column.

**Table S2**

Influence distance and weight of threat factors.

| MAX_DIST | WEIGHT | THREAT | DECAY |
| --- | --- | --- | --- |
| 4 | 0.6 | farmland | linear |
| 8 | 0.8 | rural settlements | exponential |
| 6 | 1 | urban land | exponential |
| 3 | 0.6 | transportation infrastructure | linear |
| 3 | 0.1 | unused land | exponential |

**Table S3**

Habitat types and their sensitivity to threat factors.

| NAME | HABITAT | L_far | L_rur | L_urb | L_tra | L_unu |
| --- | --- | --- | --- | --- | --- | --- |
| paddy field | 0.5 | 0.3 | 0.8 | 0.5 | 0.4 | 1 |
| dryland | 1 | 0.4 | 0.7 | 0.5 | 0.6 | 1 |
| woodland | 0.75 | 0.5 | 0.8 | 0.8 | 0.65 | 1 |
| shrubland | 1 | 0.7 | 0.65 | 0.7 | 0.6 | 1 |
| Sparse forest land | 0 | 0 | 0.6 | 0.6 | 0.5 | 0 |
| Other land use | 0.3 | 0.1 | 0.85 | 0.85 | 0.7 | 1 |

**4 Water retention**

The retention of freshwater is a key ES that is assessed in this work by combining water yield and surface runoff 15,16. Specifically, the water retention is obtained by correcting the water yield with topographic index, soil saturation hydraulic conductivity (*ksat*), and flow velocity coefficient (*Velocity*), which can be expressed by the following equation:

(9)

Where *WR* is the water retention (mm); *ksat* is the soil saturation hydraulic conductivity (mm/d) and is calculated using NeuroTheta software; *Velocity* is the flow velocity coefficient; *TI* is the topographic index; *Yield* is the water yield (mm). The calculation of each main index is as follows:

**(1) Topographic index (*TI*):**

(10)

Where *Drainage_Area* is the number of pixels in the catchment; *Soil_depth* is the soil depth (mm); *Slope* is the slope ratio.

**(2) Water yield (*Yield*)：**

(11)

Where *Yj*(*X*) is the annual water yield (mm); *P*(*x*) is the average annual precipitation (mm); *AETj*(*X*) a is the average annual evapotranspiration (mm) on LULC type *j*, which is calculated from the following equation:

(12)

Where *Rj*(*x*) is the dryness index of LULC type *j* on raster pixel *x* and represents the ratio of potential evapotranspiration to precipitation; *ωj*(*x*) is the ratio of corrected annual available water for vegetation to precipitation. They are calculated as follows:

(13)

(14)

(15)

Where *k* is the vegetation coefficient and is calculated from the vegetation leaf area index (*LAI*); *ET0* is reference evapotranspiration and is calculated according to the equation proposed by; *N* *is* the sunshine time (*h*); *Pt* is the saturated water vapor density (g/m3); *Ta* is the average daily temperature (℃); *k* is the empirical coefficient (initial value is 0.84).

(16)

Where *Z* is the Zhang coefficient whose value is between [1, 10] and is taken as the default value in this study 17; *AWC*(x) is the effective available water for vegetation and is calculated from the following equation:d

(17)

(18)

Where *PAWC* is the plant available water content; *sand* is the soil sand content (%); *silt* is the soil powder content (%); *clay* is the soil clay content (%); *OM* is the soil organic matter content (%).

The required input parameters for the model are listed in Table S4, including root depth (Root_depth), vegetation status (LULC_veg), and plant evapotranspiration coefficients according to LULC types (Kc), and flow velocity coefficients (Velocity) 18,19.

**Table S4**

The input parameters for the InVEST Water Yield model.

| LULC type | Root_depth* | LULC_veg | Kc | Velocity |
| --- | --- | --- | --- | --- |
| Cropland | 700 | 1 | 0.8 | 900 |
| Woodland | 7000 | 1 | 1 | 200 |
| Grassland | 250 | 1 | 0.7 | 500 |
| Water body | 1000 | 0 | 1.2 | 2012 |
| Built-up land | 500 | 0 | 0.4 | 2012 |
| Unused land | 500 | 1 | 0.5 | 1500 |

**5 Soil conservation(SC)**

Soil conservation services are assessed using the InVEST sediment retention model. In the model, sediment retention is equal to the sum of the sediment intercepted by the parcel itself and intercepted from the upstream parcel 20–22, which can be expressed as:

(19)

(20)

(21)

Where *TC, TP,* and *TR* are the sediment retention, potential soil erosion, actual soil erosion, and sediment intercepted by the parcel from the upstream parcel, respectively; *R* is the rainfall erosivity index; *K* is the soil erodibility; *LS* is a slope length-gradient factor; *C* is a cover-management factor; *P* is a support practice factor.

**(1) Rainfall erosivity index (*R*)**

The rainfall erosivity index is calculated based on precipitation data according to the following formula:

(22)

Where *P*(*x*) is the precipitation of pixel *x*.

**(2) Soil erodibility factor (*k*)**

The soil erodibility factor was calculated by the EPIC model using soil particle size properties data.

(23)

Where *K1* is the soil sand content (%); *K2* is the soil powder content (%); *K3* is the soil clay content (%); *K4* is the soil organic matter content (%); *K5*=1-*K*1/100.

Refer to relevant achievements 23,24,the parameters to be entered into the model are shown in Table S5.

**Table S5**

The input parameters for the InVEST Sediment Delivery Ratio (SDR) model.

| LULC type | usle_c | usle_p |
| --- | --- | --- |
| Cropland | 0.190 | 0.400 |
| Woodland | 0.020 | 1.000 |
| Grassland | 0.310 | 1.000 |
| Water body | 0.000 | 0.000 |
| Built-up land | 0.000 | 0.000 |
| Unused land | 1.000 | 1.000 |

**Appendix B. Quantification of landscape structure using landscape metrics**

**Table S1**

Description of the metrics used to assess landscape structure.

| Type | Metrics | Level* | Description |
| --- | --- | --- | --- |
| Composition | Patch density (PD) | C | Range: PD ˃ 0, without limit. Unit: n/km2. PD is measured as the number of patches of each LULC type divided by the total landscape area, reflecting the degree of landscape fragmentation 25,26. |
| Percentage of Landscape (PLAND) | C | Range: 0 ˂ PLAND ≤ 100. Unit: %. PLAND equals the percentage of the landscape comprised of the corresponding patch type and measures the dominance of a particular patch type 27,28. |
| Mean patch size  (AREA_MN) | C | AREA_MN ≥ 0, without limit; Unit: ha.The smaller the average patch size, the greater the patch density and the greater the landscape fragmentation 29–31. |
| Largest Patch  Index (LPI) | L | Range: 0 ˂ LPI ≤ 100. Unit: %. LPI equals the area of the largest patch in the landscape divided by total landscape area and measures the dominance of the largest patch 32,33. |
| Shannon’s  diversity index (SHDI) | L | Range: SHDI ≥ 0, without limit. Unit: None. SHDI equals minus the sum, across all patch types, of the proportional abundance of each patch type multiplied by that proportion and indicates the patch diversity in the landscape 34,35. |
| Configuration | Edge density  (ED) | L | ED ≥ 0, without limit; Unit: m/ha. ED equals the sum of the lengths of all edge segments in the landscape, divided by the total landscape area, multiplied by 10,000. It measures the complexity of the patch edge 36,37. |
| Landscape shape index  (LSI) | L | LSI ≥ 0, without limit; Unit: None. Larger LSI values indicate longer and more irregular patch boundaries, i.e., a higher degree of landscape fragmentation 38,39. |
| Interspersion &  Juxtaposition Index (IJI) | L | Range: 0 ˂ IJI ≤ 100; Unit: %. IJI is a relative index that represents the observed level of interspersion as a percentage of the maximum possible given the total number of patch types and reflects the adjacent characteristics between different patch types 40,41. |
| Aggregation Index (AI) | C | Range: 0 ˂ AI ≤ 100; Unit: %. AI is equal to the number of like-kind adjacency relationships involving the corresponding category divided by the maximum possible number of like-kind adjacency relationships involving the corresponding category, and is used to measure the degree of non-randomness or clustering of a particular landscape type42. |

Notes: * “L” and “C” denote the landscape- and class-level, respectively. The name of each class-level metric is distinguished by the abbreviation of the corresponding LULC type (i.e., cropland (cl), woodlands (wl), and water bodies (wb)). For example, PLAND_cl is the percentage of landscape comprising cropland.

**Appendix C. Spatial patterns of regression coefficients in estimating to the five of low model fit.**


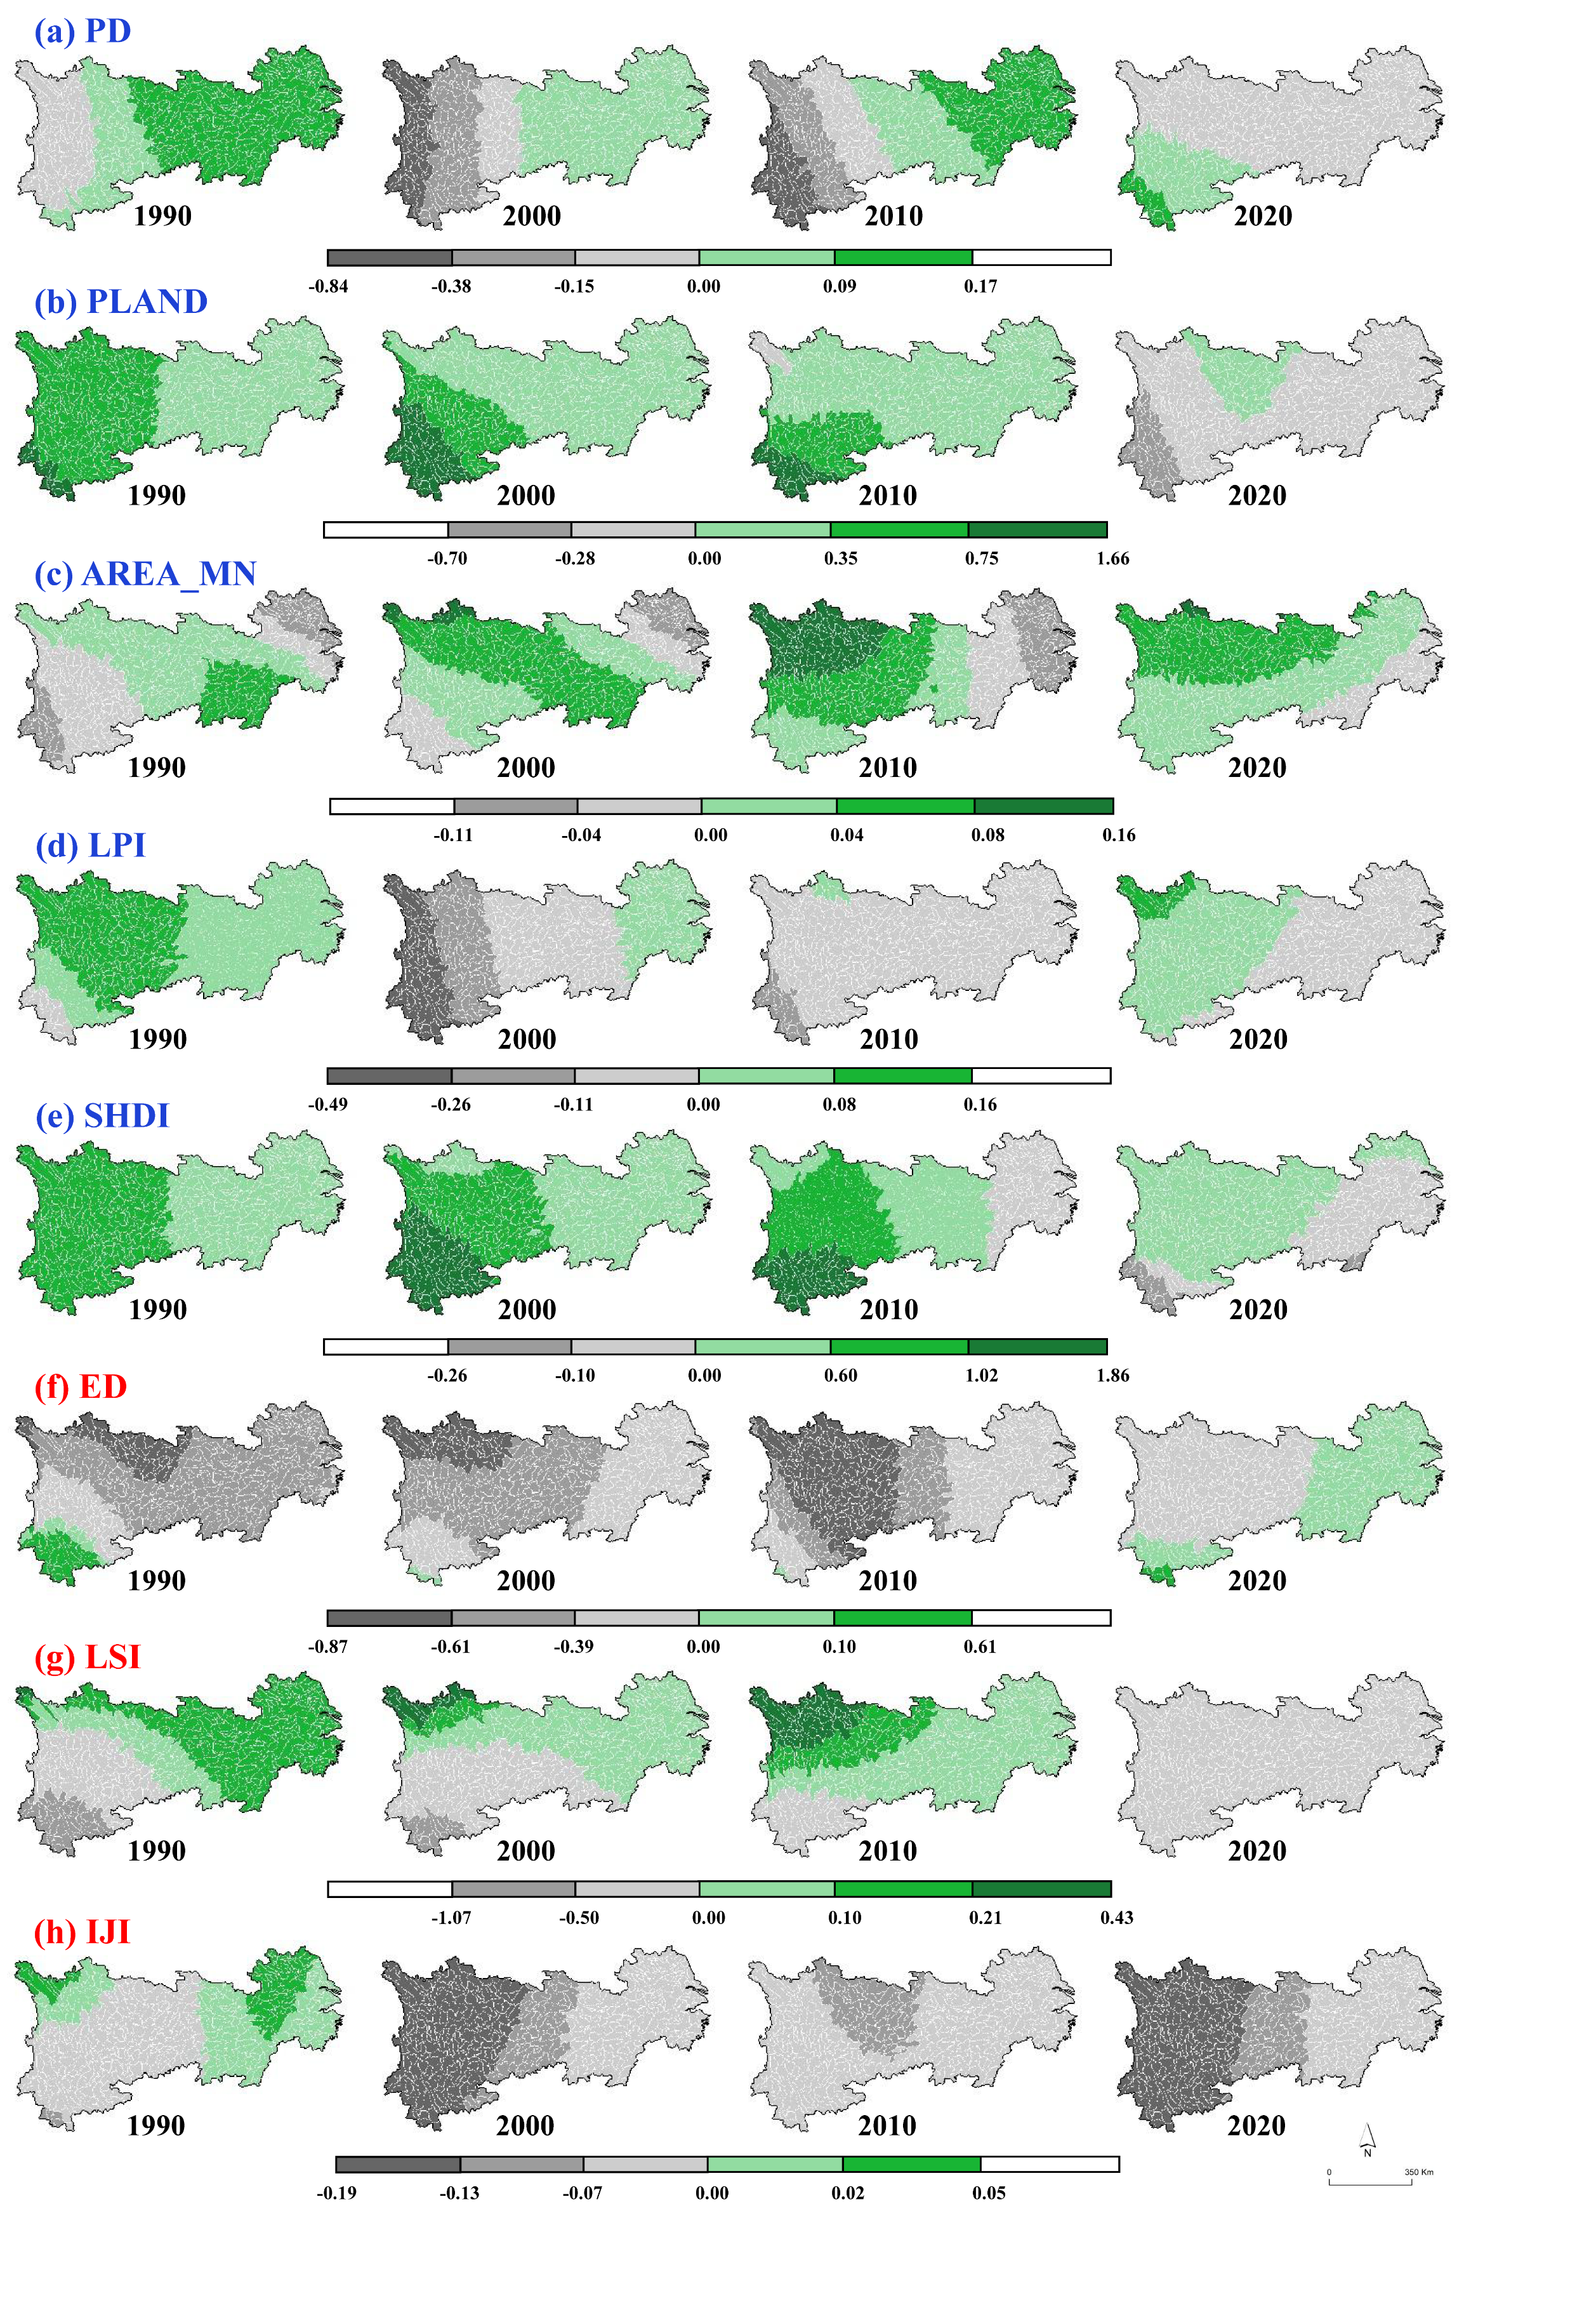


**Fig. S 1.** Spatial patterns of regression coefficients in estimating CS-FS in 1990, 2000, 2010, and 2020.


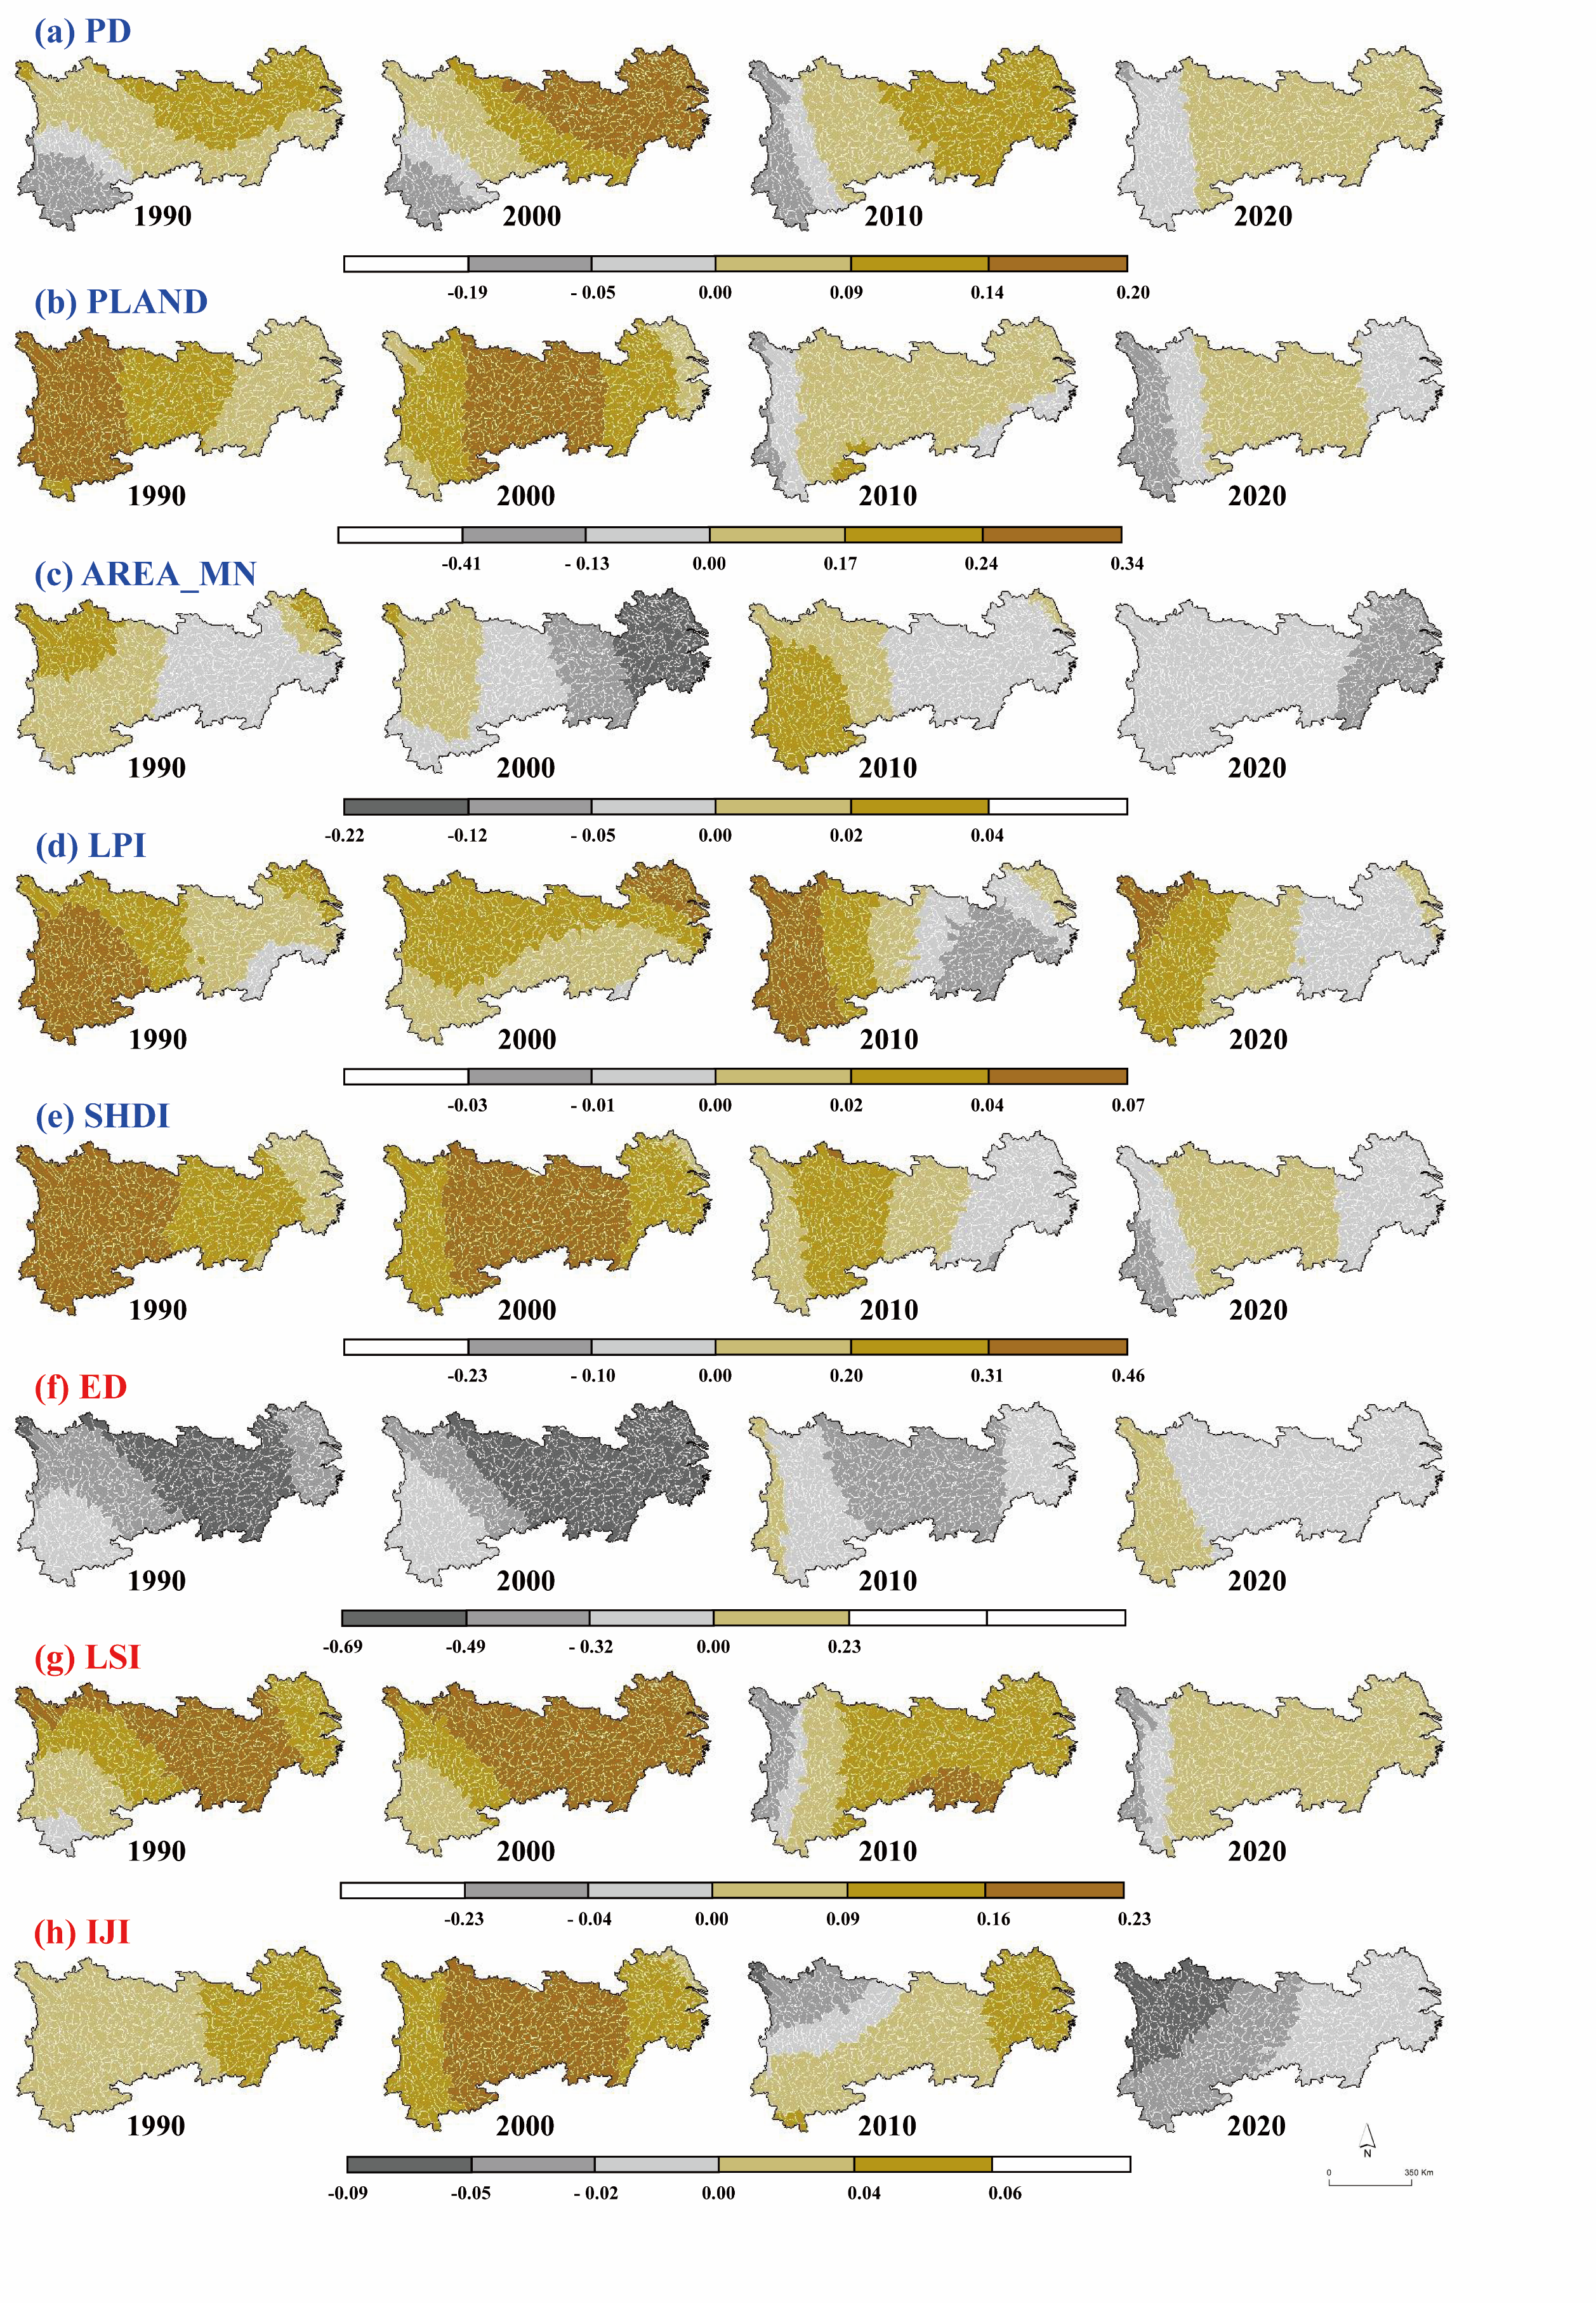


**Fig. S 2.** Spatial patterns of regression coefficients in estimating CS-WR in 1990, 2000, 2010, and 2020.


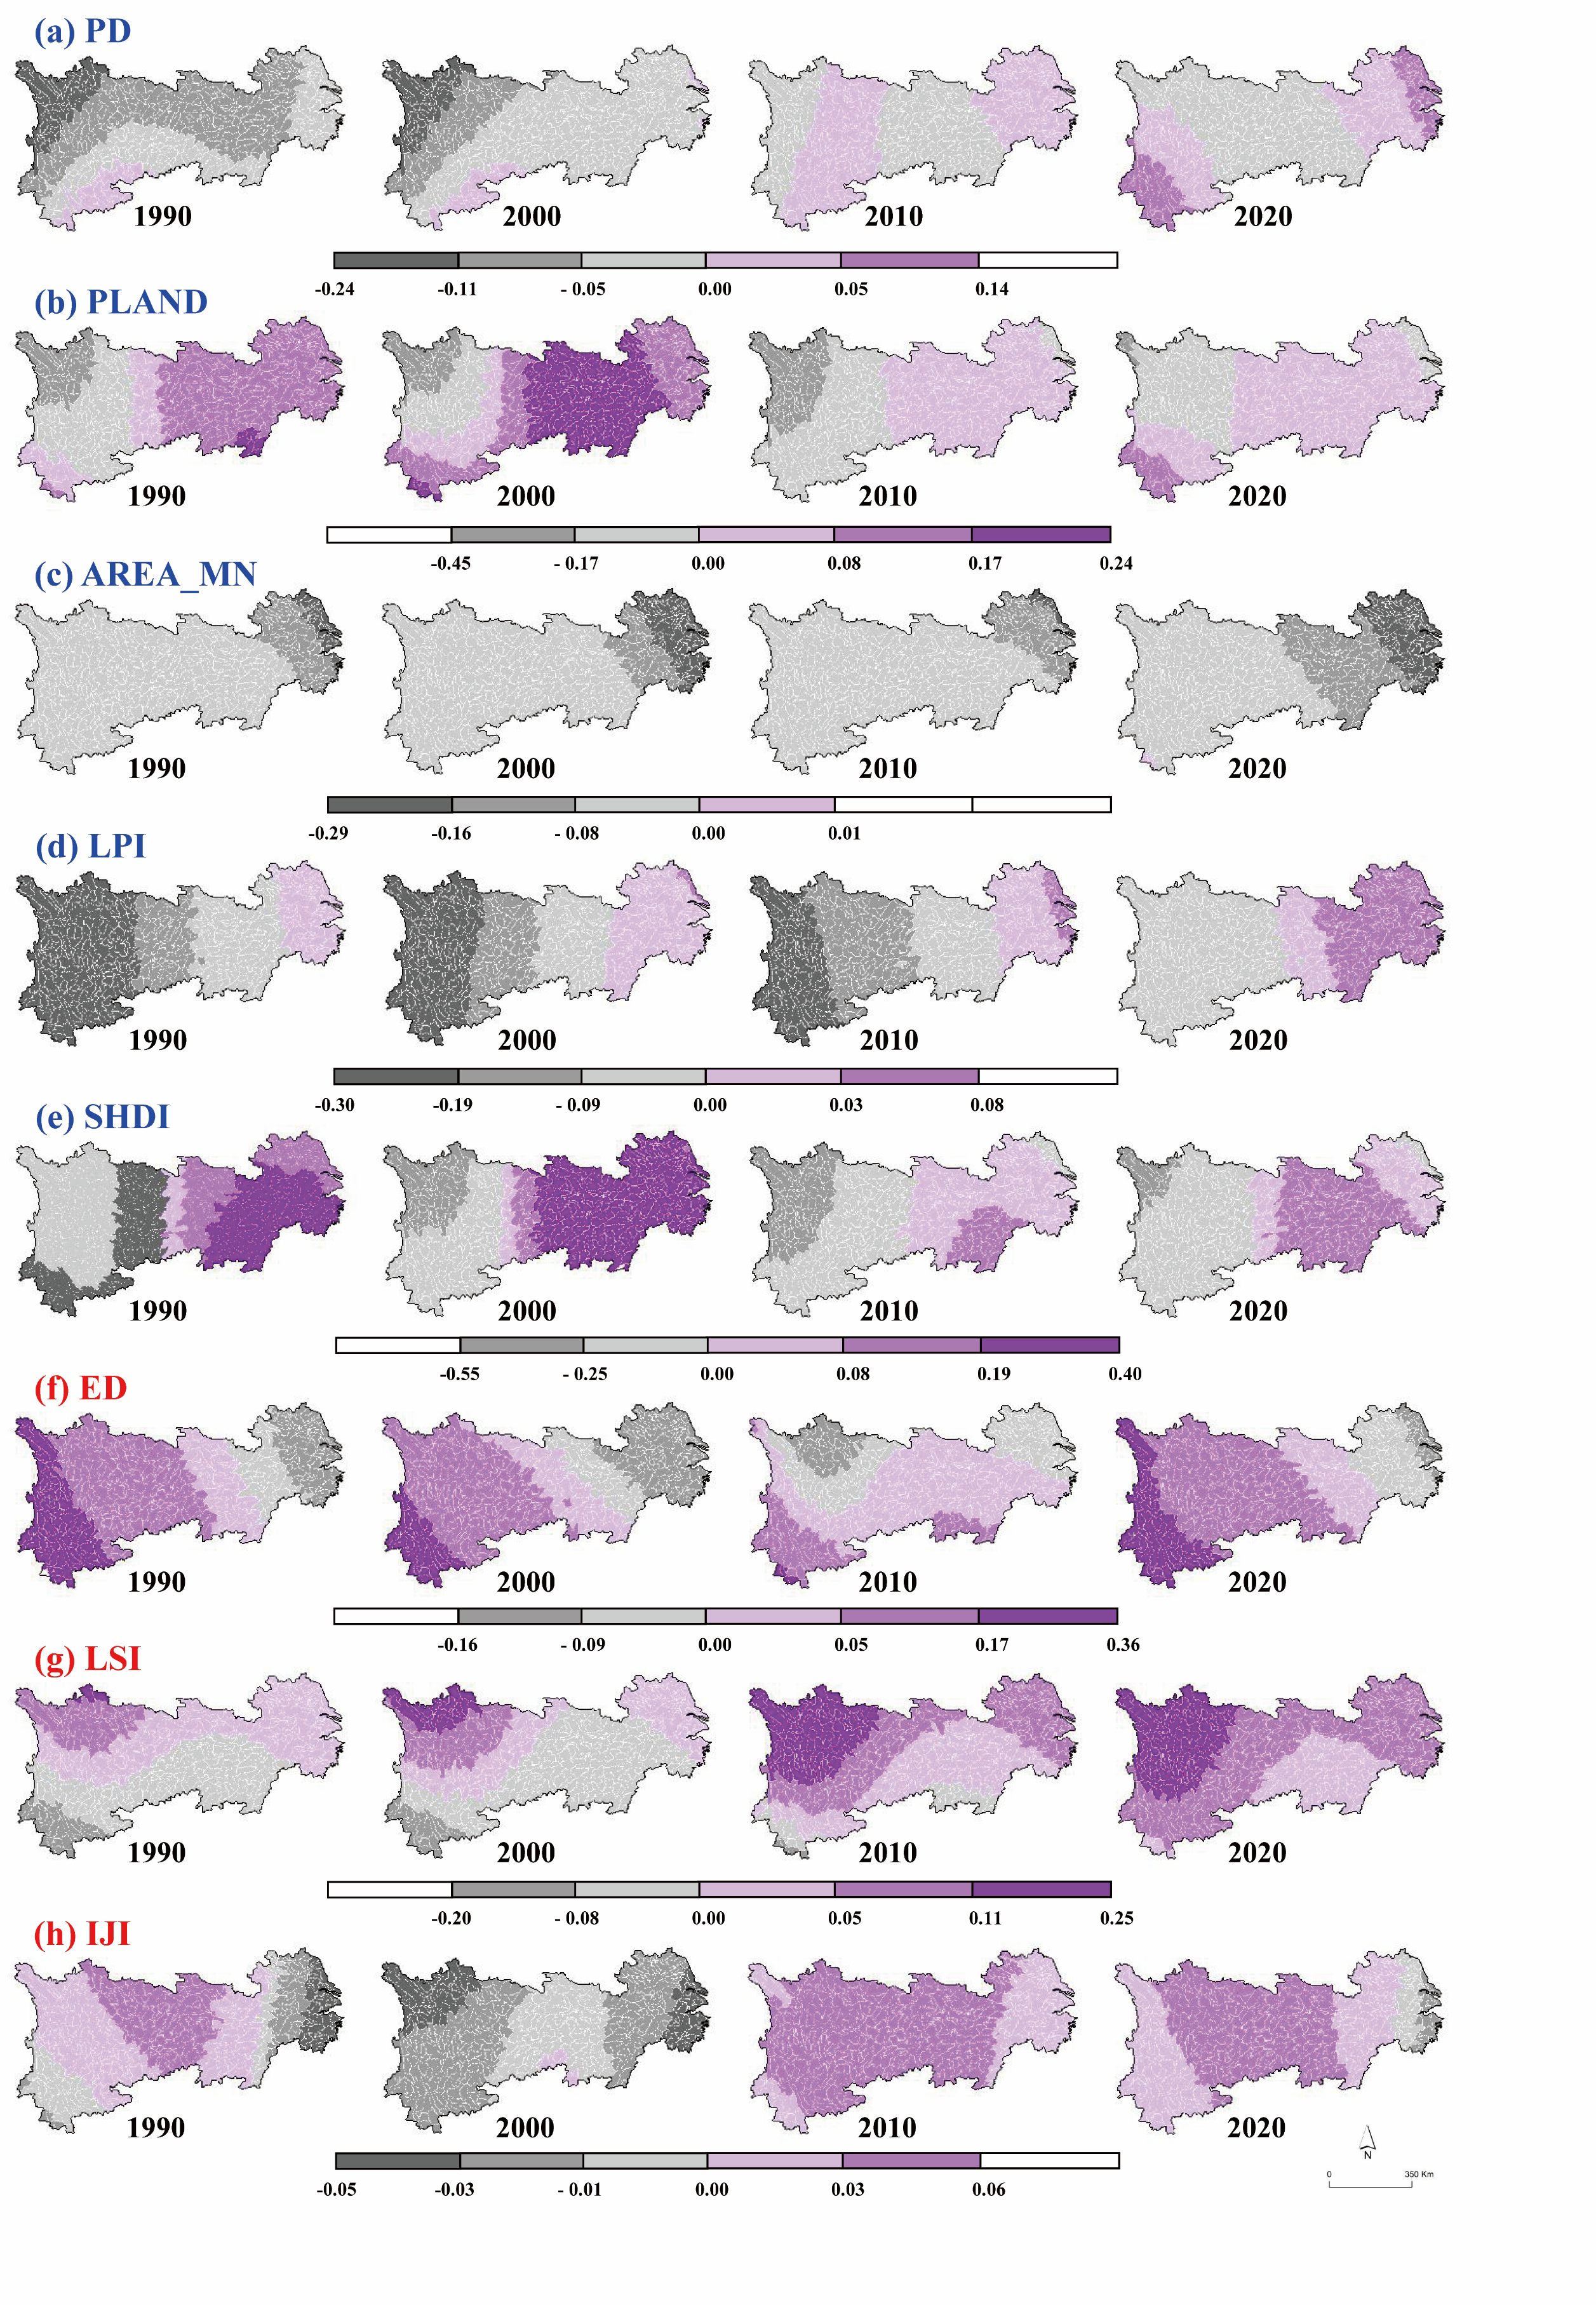


**Fig. S 3.** Spatial patterns of regression coefficients in estimating FS-HQ in 1990, 2000, 2010, and 2020.


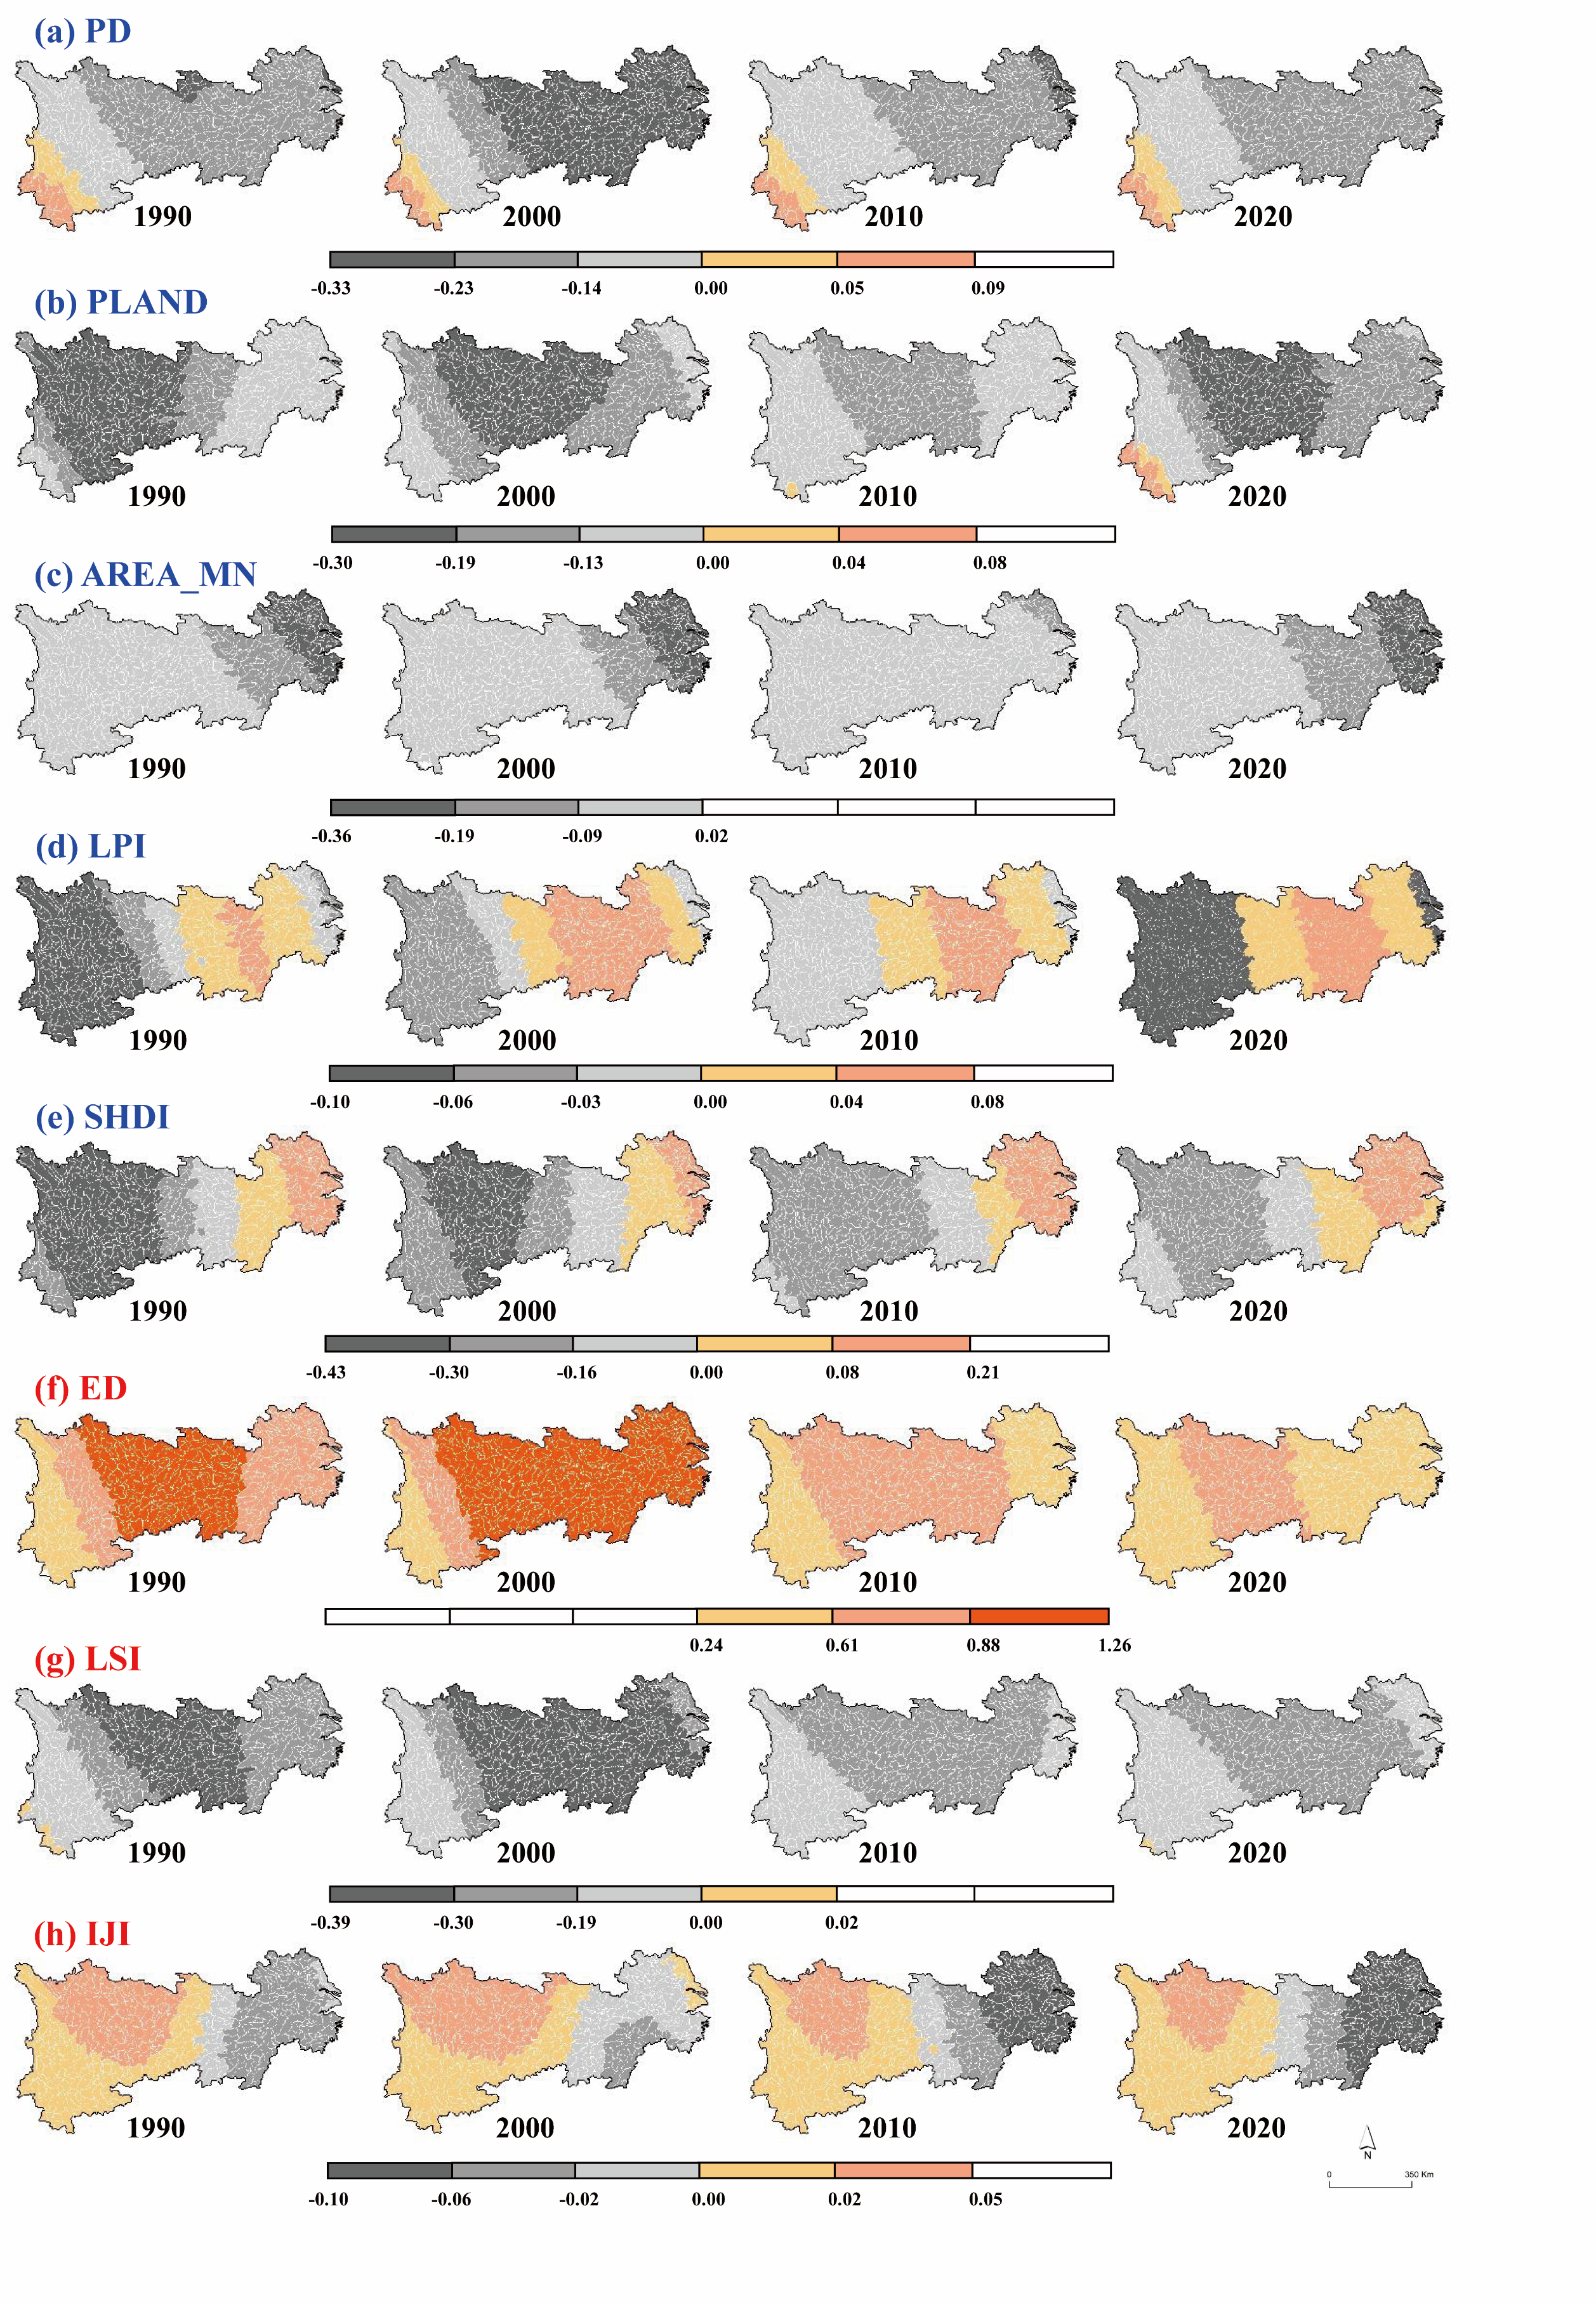


**Fig. S 4.** Spatial patterns of regression coefficients in estimating FS-WR in 1990, 2000, 2010, and 2020.


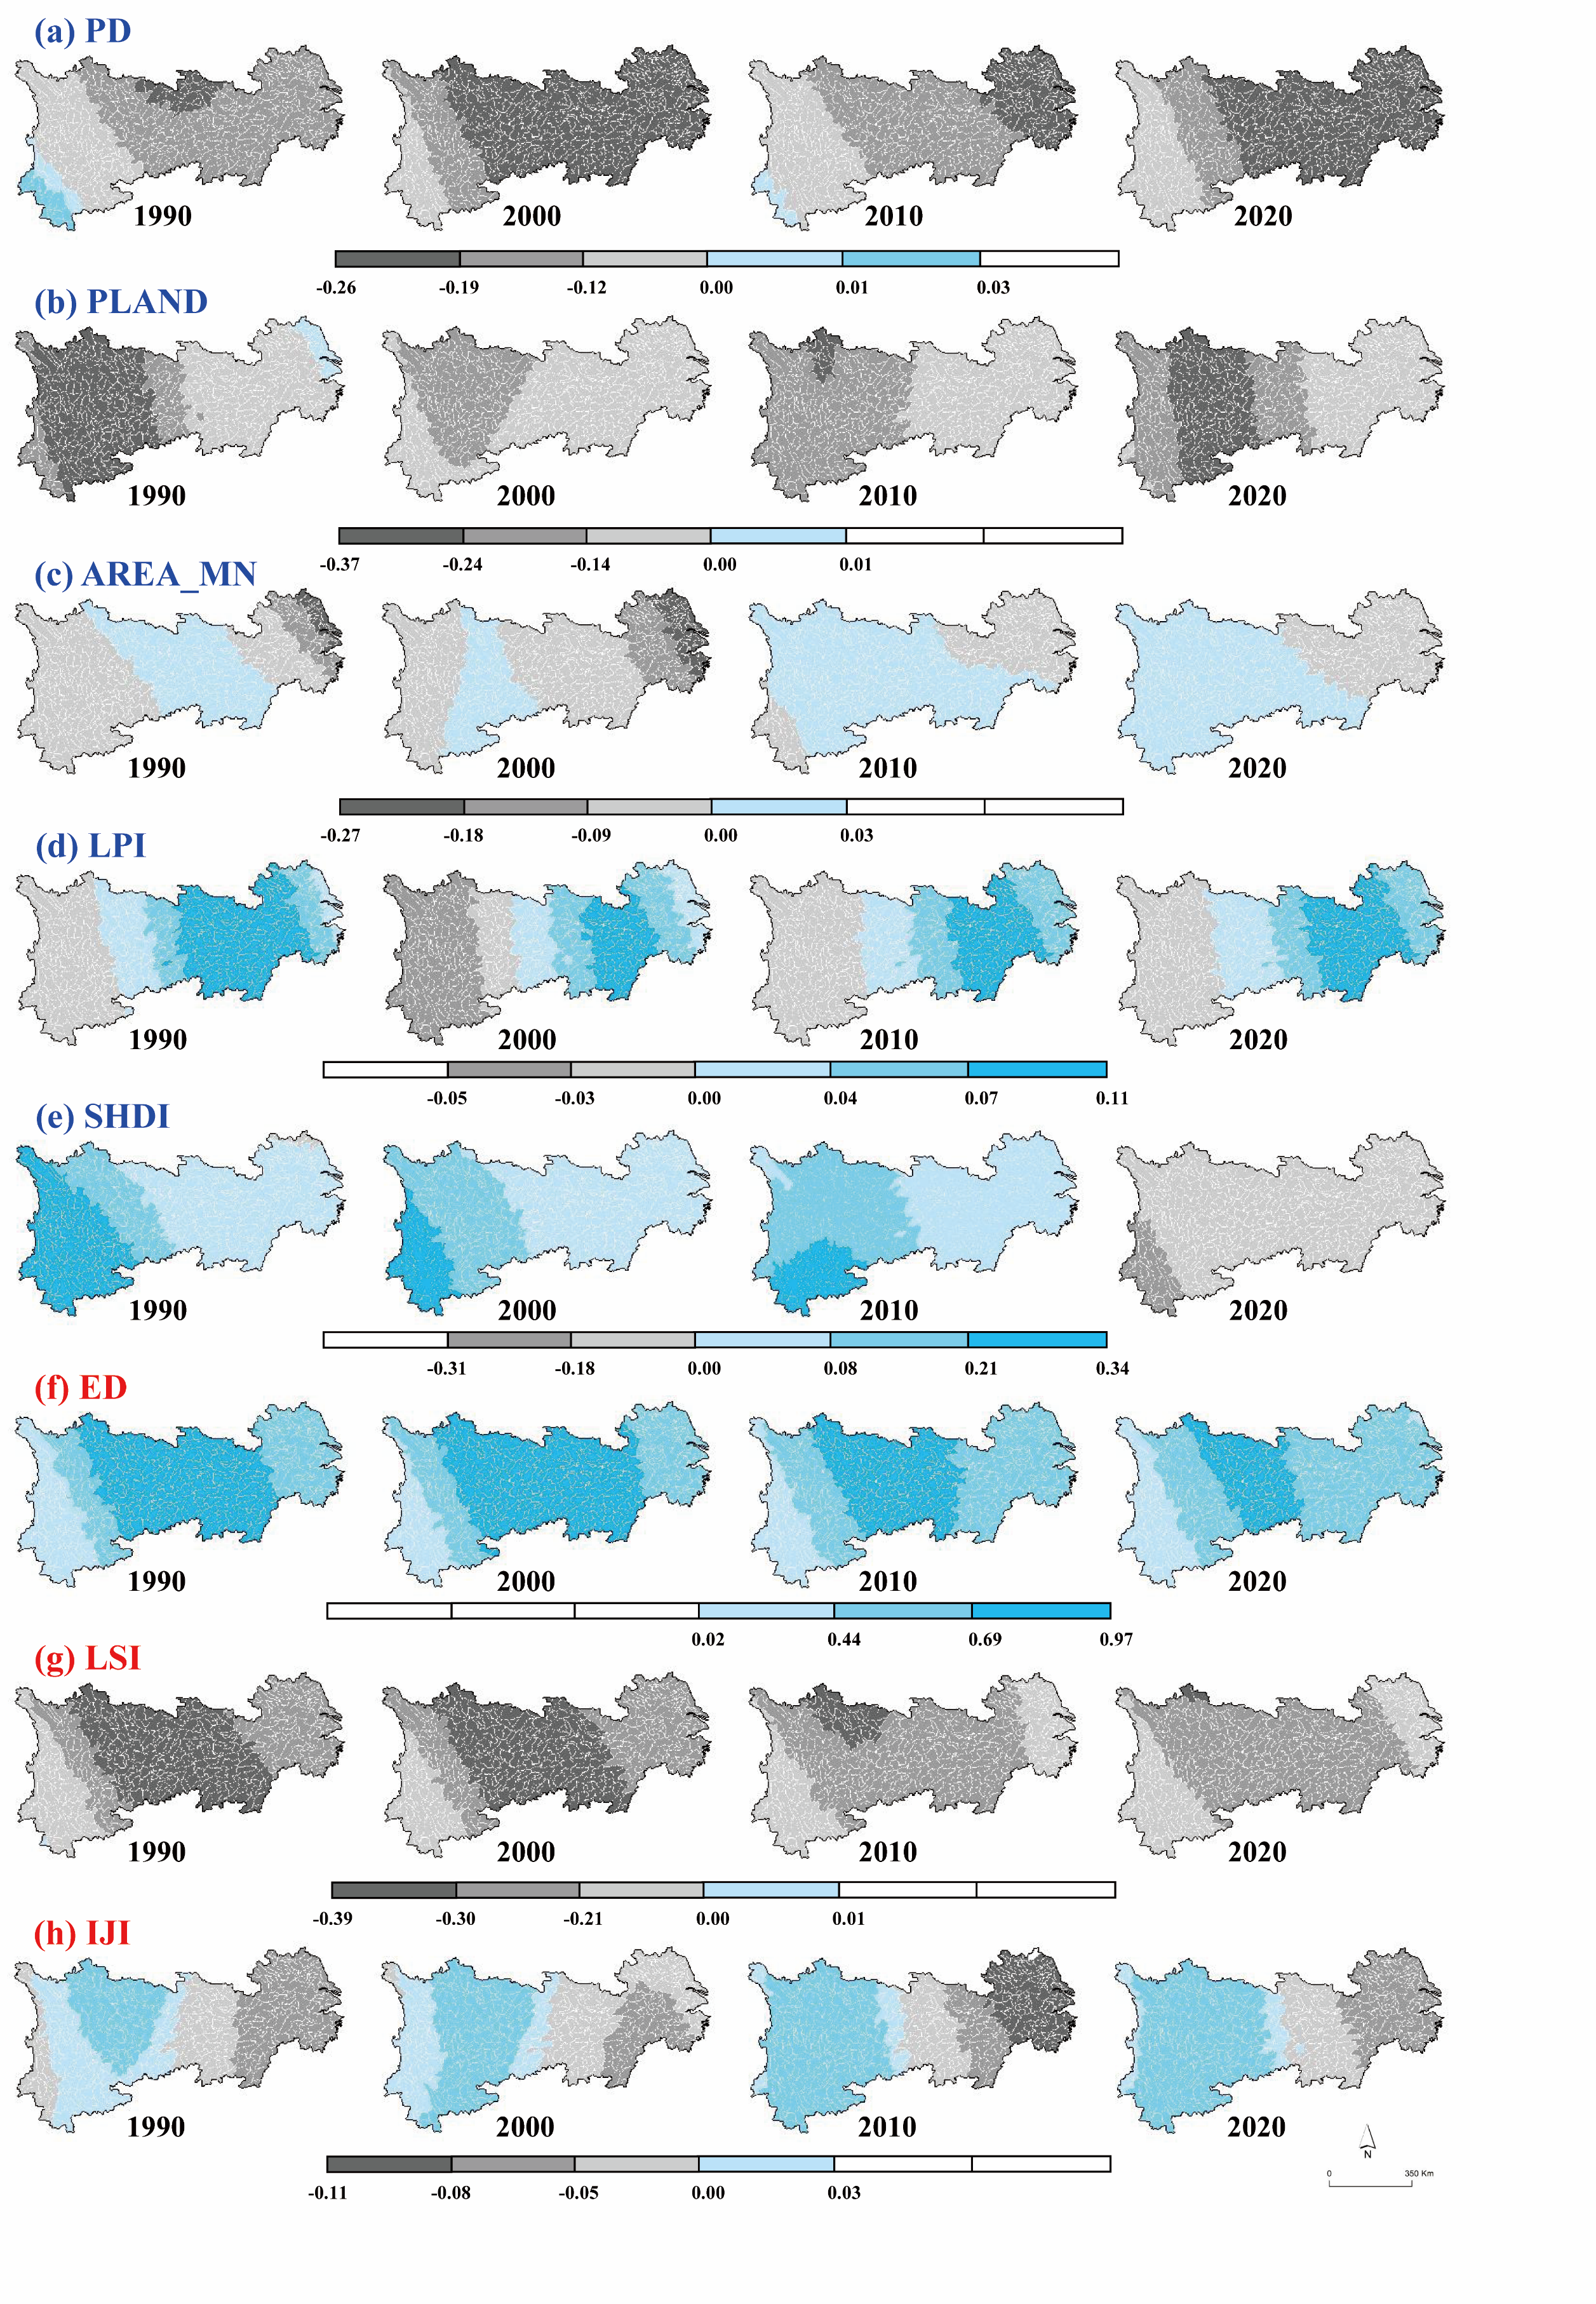


**Fig. S 5.** Spatial patterns of regression coefficients in estimating HQ-WR in 1990, 2000, 2010, and 2020.

**References**

1. Abera, W. *et al.* Impacts of land use and land cover dynamics on ecosystem services in the Yayo coffee forest biosphere reserve, southwestern Ethiopia. *Ecosystem Services* **50**, 101338 (2021).

2. Liao, Q., Liu, X. & Xiao, M. Ecological Restoration and Carbon Sequestration Regulation of Mining Areas-A Case Study of Huangshi City. *Int J Environ Res Public Health* **19**, (2022).

3. Nair, V. D. *et al.* Biochar in the Agroecosystem-Climate-Change-Sustainability Nexus. *Front Plant Sci* **8**, 2051 (2017).

4. Zhang, P., Tang, J., Sun, W., Yu, Y. & Zhang, W. Differential Effects of Conservational Management on SOC Accumulation in the Grasslands of China. *PLoS One* **10**, e0137280 (2015).

5. Quiroz Dahik, C. *et al.* Impacts of pine plantations on carbon stocks of páramo sites in southern Ecuador. *Carbon Balance Manag* **16**, 5 (2021).

6. Spawn, S. A., Sullivan, C. C., Lark, T. J. & Gibbs, H. K. Harmonized global maps of above and belowground biomass carbon density in the year 2010. *Scientific Data* **7**, 112 (2020).

7. Xu, L., Yu, G. & He, N. Increased soil organic carbon storage in Chinese terrestrial ecosystems from the 1980s to the 2010s. *Journal of Geographical Sciences* **29**, 49–66 (2019).

8. Ding, T., Chen, J., Fang, L. & Ji, J. Identifying and optimizing ecological security patterns from the perspective of the water-energy-food nexus. *Journal of Hydrology* **632**, 130912 (2024).

9. Goldenberg, R. *et al.* Distinction, quantification and mapping of potential and realized supply-demand of flow-dependent ecosystem services. *Science of The Total Environment* **593–594**, 599–609 (2017).

10. Liu, W. *et al.* The tradeoffs between food supply and demand from the perspective of ecosystem service flows: A case study in the Pearl River Delta, China. *Journal of Environmental Management* **301**, 113814 (2022).

11. Chen, J., Wang, Y., Li, F. & Liu, Z. Aquatic ecosystem health assessment of a typical sub-basin of the Liao River based on entropy weights and a fuzzy comprehensive evaluation method. *Sci Rep* **9**, 14045 (2019).

12. Marjamäki, P. H., Contasti, A. L., Coulson, T. N. & McLoughlin, P. D. Local density and group size interacts with age and sex to determine direction and rate of social dispersal in a polygynous mammal. *Ecol Evol* **3**, 3073–3082 (2013).

13. Liu, S., Liao, Q., Xiao, M., Zhao, D. & Huang, C. Spatial and Temporal Variations of Habitat Quality and Its Response of Landscape Dynamic in the Three Gorges Reservoir Area, China. *Int J Environ Res Public Health* **19**, (2022).

14. Wang, H. *et al.* Spatiotemporal dislocation of ecosystem supply and demand services from habitat quality under different development scenarios. *Ecological Indicators* **157**, 111230 (2023).

15. Chen, Q., Xu, X., Wu, M., Wen, J. & Zou, J. Assessing the Water Conservation Function Based on the InVEST Model: Taking Poyang Lake Region as an Example. *Land* **11**, (2022).

16. Xu, W. *et al.* Strengthening protected areas for biodiversity and ecosystem services in China. *Proc Natl Acad Sci U S A* **114**, 1601–1606 (2017).

17. Zhang, L. *et al.* A rational function approach for estimating mean annual evapotranspiration. *Water Resources Research* **40**, (2004).

18. Zhang, H. *et al.* Regional Spatial Management Based on Supply-Demand Risk of Ecosystem Services-A Case Study of the Fenghe River Watershed. *Int J Environ Res Public Health* **17**, (2020).

19. Pan, T., Wu, S. & Liu, Y. Relative Contributions of Land Use and Climate Change to Water Supply Variations over Yellow River Source Area in Tibetan Plateau during the Past Three Decades. *PLoS One* **10**, e0123793 (2015).

20. Chang, L., Zhao, Z., Jiang, L. & Li, Y. Quantifying the Ecosystem Services of Soda Saline-Alkali Grasslands in Western Jilin Province, NE China. *Int J Environ Res Public Health* **19**, (2022).

21. Wu, D., Zou, C., Cao, W., Xiao, T. & Gong, G. Ecosystem services changes between 2000 and 2015 in the Loess Plateau, China: A response to ecological restoration. *PLoS One* **14**, e0209483 (2019).

22. Yi, Y. *et al.* Spatio-Temporal Evolution, Prediction and Optimization of LUCC Based on CA-Markov and InVEST Models: A Case Study of Mentougou District, Beijing. *Int J Environ Res Public Health* **19**, (2022).

23. Hua, L., He, X., Yuan, Y. & Nan, H. Assessment of runoff and sediment yields using the AnnAGNPS model in a Three-Gorge watershed of China. *Int J Environ Res Public Health* **9**, 1887–1907 (2012).

24. Delevaux, J. M. S. *et al.* Scenario planning with linked land-sea models inform where forest conservation actions will promote coral reef resilience. *Sci Rep* **8**, 12465 (2018).

25. Hemrová, L., Cervenková, Z. & Münzbergová, Z. The effects of large herbivores on the landscape dynamics of a perennial herb. *Ann Bot* **110**, 1411–1421 (2012).

26. Liang, L. & Gong, P. Urban and air pollution: a multi-city study of long-term effects of urban landscape patterns on air quality trends. *Sci Rep* **10**, 18618 (2020).

27. Shen, Y.-S. & Lung, S.-C. C. Mediation pathways and effects of green structures on respiratory mortality via reducing air pollution. *Sci Rep* **7**, 42854 (2017).

28. Wu, J., Xie, W., Li, W. & Li, J. Effects of Urban Landscape Pattern on PM2.5 Pollution--A Beijing Case Study. *PLoS One* **10**, e0142449 (2015).

29. Bombieri, G. *et al.* Patterns of wild carnivore attacks on humans in urban areas. *Sci Rep* **8**, 17728 (2018).

30. Muhammed, A. & Elias, E. Class and landscape level habitat fragmentation analysis in the Bale mountains national park, southeastern Ethiopia. *Heliyon* **7**, e07642 (2021).

31. Yan, F. Large-Scale Marsh Loss Reconstructed from Satellite Data in the Small Sanjiang Plain since 1965: Process, Pattern and Driving Force. *Sensors (Basel)* **20**, (2020).

32. Li, C., Zhang, H., Hao, Y. & Zhang, M. Characterizing the heterogeneous correlations between the landscape patterns and seasonal variations of total nitrogen and total phosphorus in a peri-urban watershed. *Environ Sci Pollut Res Int* **27**, 34067–34077 (2020).

33. Liang, L. & Gong, P. Urban and air pollution: a multi-city study of long-term effects of urban landscape patterns on air quality trends. *Sci Rep* **10**, 18618 (2020).

34. Gribben, P. E. *et al.* Microbial communities in marine sediments modify success of an invasive macrophyte. *Sci Rep* **7**, 9845 (2017).

35. Su, Z., Li, X., Zhou, W. & Ouyang, Z. Effect of landscape pattern on insect species density within urban green spaces in Beijing, China. *PLoS One* **10**, e0119276 (2015).

36. Hämäläinen, S., Fey, K. & Selonen, V. The effect of landscape structure on dispersal distances of the Eurasian red squirrel. *Ecol Evol* **9**, 1173–1181 (2019).

37. Roffler, G. H., Pilgrim, K. L., Zarn, K. E., Schwartz, M. K. & Levi, T. Variation in adult and pup wolf diets at natal den sites is influenced by forest composition and configuration. *Ecol Evol* **13**, e9648 (2023).

38. Liang, L. & Gong, P. Urban and air pollution: a multi-city study of long-term effects of urban landscape patterns on air quality trends. *Sci Rep* **10**, 18618 (2020).

39. Wu, J. *et al.* Spatial Heterogeneity and Attribution Analysis of Urban Thermal Comfort in China from 2000 to 2020. *Int J Environ Res Public Health* **19**, (2022).

40. Hooven, N. D., Springer, M. T., Nielsen, C. K. & Schauber, E. M. Influence of natal habitat preference on habitat selection during extra-home range movements in a large ungulate. *Ecol Evol* **13**, e9794 (2023).

41. Roffler, G. H., Pilgrim, K. L., Zarn, K. E., Schwartz, M. K. & Levi, T. Variation in adult and pup wolf diets at natal den sites is influenced by forest composition and configuration. *Ecol Evol* **13**, e9648 (2023).

42. Xu, S., Li, S.-L., Zhong, J. & Li, C. Spatial scale effects of the variable relationships between landscape pattern and water quality: Example from an agricultural karst river basin, Southwestern China. *Agriculture, Ecosystems & Environment* **300**, 106999 (2020).
