# Supplementary material for: Spatiotemporal effects of landscape structure on the trade-offs and synergies among ecosystem service functions in Yangtze River Economic Belt, China
Source: Research Square preprint supplement (doi:10.21203/rs.3.rs-5461061/v1), 2025-04-04
Supplement: Supplementary file 2 [file 763168ea46e6f8a4ae314d89.xlsx]

## Sheet: data
year	LID	PD	PLAND	LPI	ED	LSI	AREA_MN	IJI	SHDI	AI	CS	FS	HQ	WC	SC		year	LID	PD	PLAND	LPI	ED	LSI	AREA_MN	IJI	SHDI	AI	CS	FS	HQ	WC	SC		year	LID	PD	PLAND	LPI	ED	LSI	AREA_MN	IJI	SHDI	AI	CS	FS	HQ	WC	SC
1990	1	0.0064	77.8924	75.5571	10.623	27.7398	1692.44	11.0424	0.5586	98.9507	107985768	14064	0.678993	169896	8.46734e+07		2000	1	0.0063	77.8931	75.5587	10.6232	27.7391	1698.5	11.0192	0.5585	98.951	106766512	7748.16	0.671018	136690	6.76686e+07		2010	1	0.0191	71.8549	67.5934	14.2099	36.4559	617.039	39.6487	0.6526	98.5522	106297966	8367.3	0.668116	163021	8.10324e+07
1990	2	0.0038	89.9881	89.8794	9.0666	18.8362	1384.59	11.1697	0.3399	99.2025	69255716	1350.18	0.735773	105841	4.98628e+07		2000	2	0.0036	89.9852	89.8765	9.0687	18.8387	1398.72	11.2147	0.3401	99.2024	68430605	1957.75	0.72787	96731	4.45843e+07		2010	2	0.0153	88.2724	87.9305	13.2615	26.5855	509.575	39.6656	0.4029	98.8748	68148503	954.272	0.724607	106598	5.00988e+07
1990	3	0.0141	85.8706	85.3412	8.873	12.1879	1122.08	10.121	0.4184	99.1978	25911000	652.499	0.696272	18385.3	1.64642e+07		2000	3	0.0141	85.8711	85.3417	8.8728	12.1877	1122.08	10.1074	0.4184	99.1979	25846210	630.849	0.693718	22977.5	2.05095e+07		2010	3	0.0155	85.6143	84.7899	8.8789	12.1949	1151.46	10.209	0.423	99.1967	25846210	656.498	0.693718	20505.1	1.87782e+07
1990	4	0.01	80.1095	54.6218	15.5857	27.8952	193.119	49.2786	0.6063	98.5549	41486067	1.12106e+06	0.465316	127478	5.25352e+06		2000	4	0.0102	79.7168	54.1051	15.8299	28.3051	192.954	49.2273	0.6134	98.5276	41173670	1.11426e+06	0.457807	78809.8	3.20335e+06		2010	4	0.0135	76.1919	50.9942	16.252	29.0125	197.694	29.9015	0.6703	98.416	40875641	1.13661e+06	0.452739	67898.8	2.80199e+06
1990	5	0.0181	68.0529	49.127	20.246	36.0161	190.822	37.6415	0.7914	97.7632	38759849	977818	0.421801	134879	9.78156e+06		2000	5	0.0192	67.3915	48.742	20.4873	36.4147	191.492	37.3765	0.798	97.7165	38099252	953517	0.408979	81618.2	6.03191e+06		2010	5	0.0231	64.3003	43.4277	20.9915	37.2525	194.084	18.447	0.8296	97.554	37826793	983947	0.403254	70060.8	5.27353e+06
1990	6	0.015	73.9547	72.7342	31.563	42.3784	93.5774	17.4523	0.6021	96.8149	23704891	650865	0.371845	68778	610779		2000	6	0.0154	73.0882	71.8601	31.8503	42.7492	94.9776	18.1492	0.6127	96.7484	23897658	656786	0.378566	43345.3	404445		2010	6	0.0229	67.3808	65.849	32.2746	43.2967	98.9252	11.6628	0.6672	96.4328	23730663	694273	0.373473	39345.7	374282
1990	7	0.0101	74.5412	58.5111	18.152	19.8379	187.207	55.4011	0.7354	98.1375	12889250	317330	0.485098	29581.2	531799		2000	7	0.0108	73.2431	57.5404	18.6711	20.3371	183.959	56.3232	0.7562	98.0569	12857799	313835	0.479177	18372.9	340869		2010	7	0.0189	69.6518	31.5403	18.6023	20.2727	189.118	34.5021	0.8087	97.9516	12718923	305416	0.471161	13978	276841
1990	8	0.0261	70.1256	55.2189	18.3268	20.9152	149.069	24.3129	0.8182	97.9158	13971875	364194	0.503325	29607.8	528752		2000	8	0.0267	68.6155	53.9294	19.1031	21.6747	144.577	24.6508	0.8409	97.7903	13879276	345435	0.50233	17515.6	356429		2010	8	0.0326	66.5388	52.8368	19.637	22.1958	143.092	25.4864	0.8697	97.6755	13842166	347886	0.5002	13460.9	287204
1990	9	0.0285	74.0611	25.4865	19.9719	25.9483	150.992	40.4264	0.7428	98.0119	20120724	466719	0.481463	49515	1.29596e+06		2000	9	0.0353	72.022	24.9904	20.9241	27.0665	146.192	41.1958	0.774	97.8713	20193499	471166	0.47934	31095.7	846241		2010	9	0.0403	67.4277	13.5129	20.9315	27.0734	156.893	41.4142	0.8296	97.7568	19995579	455665	0.471906	22810.7	667313
1990	10	0.0115	81.5486	74.4612	18.3199	22.0704	118.455	27.4392	0.5622	98.2741	18483836	480127	0.473606	37431.6	588313		2000	10	0.0167	79.2114	72.3011	20.8488	24.8324	105.236	28.4467	0.6021	97.9945	18047369	451589	0.458313	24737.6	408541		2010	10	0.0178	76.8513	69.8543	20.4855	24.4332	117.871	26.8099	0.6395	97.9748	18010259	464398	0.456664	20033.8	332804
1990	11	0.0024	82.7373	82.7359	19.5208	18.8426	107.32	14.5464	0.4752	98.1985	11621954	308520	0.450565	23662.5	244672		2000	11	0.0056	81.5562	81.5528	20.8145	19.9884	102.085	13.8497	0.4934	98.0552	11692650	300196	0.45364	16830.9	183345		2010	11	0.0104	78.6084	78.2376	21.5417	20.6322	107.598	15.9165	0.5368	97.9148	11649355	303154	0.450689	13736.8	154013
1990	12	0.0273	82.5742	62.8122	27.4307	30.75	104.219	44.1768	0.5261	97.4345	16197497	475489	0.433107	49709.7	439568		2000	12	0.0279	82.3257	62.6375	27.5573	30.8799	103.898	44.353	0.5309	97.4154	16341682	483792	0.447065	36798.6	314821		2010	12	0.0344	79.8017	59.0926	27.0948	30.4035	110.221	46.8396	0.5819	97.3821	16306867	507156	0.444354	33692.5	286977
1990	13	0.0093	91.8457	74.3175	10.6331	19.5875	200.209	54.3794	0.3277	99.0495	37921084	1.25517e+06	0.477583	141185	910615		2000	13	0.012	90.5913	73.149	11.935	21.5797	177.626	59.7791	0.3669	98.9356	37625879	1.20587e+06	0.479454	117126	744102		2010	13	0.0192	82.7683	66.2109	14.7031	25.8154	164.165	42.1007	0.5636	98.6097	37164169	1.21787e+06	0.471314	113699	732179
1990	14	0.0273	76.7207	71.2841	24.0063	27.919	102.925	49.8105	0.704	97.6496	17590469	525339	0.495975	56339	451143		2000	14	0.0278	76.0587	70.5126	24.4024	28.3474	102.362	50.5951	0.7163	97.5927	17556588	503405	0.498503	41958.7	335698		2010	14	0.0374	72.6334	66.8158	25.7886	29.8436	100.278	56.3446	0.7753	97.3553	17425733	519866	0.49562	40516.6	328729
1990	15	0.0366	79.9804	54.7293	16.0605	18.9462	144.464	68.396	0.6251	98.4755	16785421	501463	0.534584	81190.6	470772		2000	15	0.0378	78.9007	53.8923	16.8927	19.8158	132.828	69.8475	0.6476	98.3819	16896831	500078	0.53734	62888.1	364180		2010	15	0.0378	75.0477	50.2001	18.5053	21.5004	127.78	44.1382	0.7326	98.1459	16819997	503290	0.533191	61613.4	358466
1990	16	0.0354	74.0797	38.747	19.2183	22.3109	134.652	72.9887	0.729	98.0609	16893602	492004	0.554531	66293.2	443215		2000	16	0.0388	71.2246	37.0911	22.0041	25.2467	115.641	75.6135	0.7699	97.7085	16636356	443649	0.569713	50024.4	355757		2010	16	0.0388	67.0136	35.1301	23.9108	27.2552	111.157	78.2823	0.8363	97.3983	16592804	450902	0.570793	50671	362180
1990	17	0.0259	88.5813	46.9595	16.2947	16.7155	127.811	52.4415	0.4236	98.5856	12840578	413254	0.471661	40440.4	346688		2000	17	0.0343	84.957	45.607	20.2065	20.2557	108.107	62.6555	0.5183	98.2114	12847254	387560	0.470306	33672.3	290736		2010	17	0.048	78.694	42.8966	22.1614	22.0234	107.309	65.6479	0.6443	97.9156	12685230	391105	0.465557	34730	310299
1990	18	0.0103	89.5044	48.1371	11.1915	14.3164	231.935	70.159	0.4021	99.0599	20460582	596427	0.499588	78647.3	477993		2000	18	0.0103	89.0057	47.7366	11.6614	14.8462	219.9	70.3113	0.417	99.0167	20458499	608519	0.490302	57598.9	351371		2010	18	0.0093	85.3284	45.7142	12.3607	15.6317	221.819	46.5939	0.5245	98.9308	20359975	632171	0.485066	55107.4	337188
1990	19	0.0148	85.9676	55.3359	6.3888	7.003	568.999	72.5472	0.4777	99.3914	10676362	294306	0.482372	38429.2	372723		2000	19	0.0139	83.277	53.328	6.4099	7.0203	600.61	72.7072	0.5526	99.3776	10431099	287861	0.478761	29007.1	283788		2010	19	0.0176	79.401	50.7162	8.8673	9.0394	427.315	59.014	0.6727	99.1675	10406359	299500	0.476777	27801.7	270796
1990	20	0.0213	93.0529	44.9459	8.5028	11.9983	384.941	42.9783	0.2737	99.2243	19033109	599403	0.466347	53544.1	485705		2000	20	0.0138	90.0381	43.9467	10.4023	14.0543	309.986	37.63	0.3481	99.0508	18632848	558386	0.451401	47541.2	435246		2010	20	0.0234	82.8852	41.6948	11.8671	15.6405	339.695	31.6975	0.4826	98.8467	18444684	548787	0.44276	46737.8	432584
1990	21	0.017	84.9408	64.6632	13.8694	25.3006	182.42	51.5392	0.5254	98.7512	43453029	1.32574e+06	0.48393	117397	1.09808e+06		2000	21	0.0231	78.0264	60.1479	19.349	34.4055	146.662	46.7121	0.66	98.1367	41313834	1.15011e+06	0.453002	95904.1	947873		2010	21	0.0305	69.5828	54.9134	20.4303	36.2032	167.18	30.8046	0.7768	97.8392	40230945	1.11867e+06	0.435399	99227.7	1.02817e+06
1990	22	0.0405	78.2171	38.3652	19.9281	25.0249	102.976	35.8328	0.6804	98.0544	20380523	472997	0.534236	56812.5	2.04024e+06		2000	22	0.0595	73.1003	34.6995	23.8207	29.4827	96.3189	33.5032	0.7694	97.5462	19948921	427203	0.513635	46989.4	1.75296e+06		2010	22	0.0624	63.7451	29.6493	24.5094	30.2711	109.526	37.3191	0.8987	97.171	18970351	397439	0.473705	51754.3	2.06116e+06
1990	23	0.0484	62.073	26.0678	21.5537	24.6338	129.115	64.6126	0.889	97.338	15023890	344133	0.591672	32964.9	388692		2000	23	0.0538	59.6426	26.1909	24.1384	27.2744	117.51	62.3984	0.9264	96.9243	14688617	314883	0.56911	27150	318309		2010	23	0.0598	51.9869	27.9462	23.6315	26.7551	123.314	65.2724	1.0118	96.6346	14466525	305614	0.558633	29962.7	362172
1990	24	0.0224	79.5025	60.1614	21.432	39.4681	96.5313	39.0713	0.6473	98.0037	49335766	1.06374e+06	0.539857	148295	9.54036e+06		2000	24	0.0332	75.5504	57.2677	22.5727	41.4776	98.2124	38.8608	0.7135	97.8027	48205293	927353	0.524669	121258	7.84409e+06		2010	24	0.0445	65.7697	47.0212	22.5809	41.4903	115.788	41.9276	0.8415	97.512	46174060	864762	0.490443	156492	1.06748e+07
1990	25	0.0042	89.9731	89.8198	14.1467	33.8511	133.879	30.0474	0.3829	98.8033	86021000	1.96105e+06	0.552457	230945	1.30622e+07		2000	25	0.0049	87.9128	87.7558	16.1169	38.2927	128.77	28.2427	0.4314	98.611	84332668	1.79553e+06	0.535956	183064	1.07081e+07		2010	25	0.0079	85.5359	84.4195	16.8452	39.9341	131.477	32.1362	0.4959	98.5156	83874900	1.93115e+06	0.532337	249457	1.47808e+07
1990	26	0.0111	79.4579	79.2175	17.2546	22.3748	120.739	60.1932	0.6391	98.3357	22160748	556361	0.557442	46352.2	1.30229e+06		2000	26	0.0119	78.8724	78.6334	17.8546	23.0877	117.414	60.7075	0.6515	98.2685	22239813	525573	0.566935	36015.6	1.01776e+06		2010	26	0.0146	77.2678	77.004	18.2538	23.5604	120.416	61.297	0.6861	98.1984	22158269	551453	0.565274	44324.5	1.26904e+06
1990	27	0.0306	53.6075	37.6031	14.7428	16.2352	193.98	70.4489	0.8603	97.8719	12517780	265938	0.686615	24051.5	382629		2000	27	0.0306	53.2649	37.6363	15.1387	16.6104	189.88	70.4863	0.8652	97.8051	12563757	254937	0.677156	18560.2	291265		2010	27	0.0362	50.8183	37.7193	17.0094	18.3829	179.228	69.4281	0.9135	97.4535	12525690	271719	0.67604	21151.9	332899
1990	28	0.0224	83.5252	63.4823	15.5623	15.2411	124.037	36.1831	0.563	98.5307	11696633	252817	0.551766	34458.5	2.22358e+06		2000	28	0.0275	80.7046	60.9229	18.0915	17.4138	120.429	33.9964	0.6252	98.249	11451273	226783	0.543778	27622	1.83259e+06		2010	28	0.0387	77.0676	60.0249	18.5498	17.7866	122.728	35.2523	0.6941	98.1479	11266807	242721	0.532256	40788	2.78828e+06
1990	29	0.0138	82.8618	41.567	13.8555	24.8069	166.302	42.5603	0.5686	98.6842	42897197	847226	0.603898	151401	2.37252e+07		2000	29	0.015	82.07	41.144	14.5552	25.9309	161.816	42.4066	0.589	98.6118	42841353	794473	0.605814	125782	1.94737e+07		2010	29	0.0314	78.6443	36.7959	15.4656	27.3443	167.873	45.3683	0.6672	98.5076	42246964	829454	0.594102	188547	3.08525e+07
1990	30	0.0048	90.417	90.3333	7.9372	22.7173	252.293	42.1854	0.3755	99.3171	124541934	1.62482e+06	0.737271	626977	1.832e+08		2000	30	0.0042	89.8973	89.8129	8.3277	23.7263	245.09	41.6797	0.3921	99.2821	124153850	1.56379e+06	0.731478	528086	1.53112e+08		2010	30	0.0113	86.981	86.6914	9.393	26.4449	242.875	43.0586	0.4748	99.1735	123144832	1.56702e+06	0.73375	738608	2.2862e+08
1990	31	0.0106	47.0158	43.114	12.9917	15.7282	208.984	54.0475	0.9112	97.8372	14590947	257493	0.705017	18517.4	478559		2000	31	0.0129	46.9302	43.1634	13.0681	15.807	206.948	54.2143	0.912	97.8222	14651949	238450	0.710641	12900.3	357985		2010	31	0.0141	44.2152	44.2434	13.2149	15.9569	213.45	55.2603	0.9407	97.6807	14515622	242354	0.707358	15262.6	431158
1990	32	0.0216	67.1852	55.2363	24.79	59.0422	131.191	23.3372	0.8585	97.1869	70728860	1.7889e+06	0.479792	157647	2.04251e+06		2000	32	0.025	65.9559	54.0917	25.3971	60.3918	132.794	23.3594	0.8737	97.0718	70502296	1.67046e+06	0.475107	108355	1.43766e+06		2010	32	0.0306	60.9146	40.6818	25.0945	59.7124	141.333	24.3658	0.9261	96.8792	69887367	1.72151e+06	0.468685	99019.2	1.29592e+06
1990	33	0.0156	91.0238	46.9186	12.0435	14.5419	179.013	41.2011	0.3643	98.9708	18785075	469658	0.544255	63962.3	5.09703e+06		2000	33	0.0184	86.9936	44.7116	16.0456	18.7807	160.599	37.7802	0.4692	98.5867	18500482	415347	0.539226	52215	4.24366e+06		2010	33	0.0173	85.8945	44.3684	16.676	19.4483	158.612	37.8323	0.4956	98.516	18445242	437490	0.536771	77438.9	6.3563e+06
1990	34	0.0057	80.9172	76.119	15.7668	32.9822	135.446	34.3935	0.6201	98.5161	61052122	1.35632e+06	0.557154	117010	5.39511e+06		2000	34	0.0069	79.6803	74.9331	16.9238	35.2422	133.025	33.2641	0.6462	98.3862	60820153	1.26672e+06	0.550418	93888.5	4.29887e+06		2010	34	0.0108	78.6318	72.8535	17.3499	36.0749	132.419	33.938	0.6672	98.3291	60627191	1.38798e+06	0.549606	120096	5.4489e+06
1990	35	0.0032	94.4601	94.4342	9.6124	10.1636	179.308	67.8368	0.2521	99.1867	13719870	309615	0.613137	59929.3	2.45774e+06		2000	35	0.0032	94.2422	94.2163	9.8603	10.3814	175.988	67.3844	0.2596	99.1666	13739677	283318	0.620845	49171.5	1.94925e+06		2010	35	0.0049	93.0097	92.9544	10.5843	11.0117	174.749	66.9564	0.2993	99.0991	13711366	289237	0.619544	77110.6	3.22055e+06
1990	36	0.0056	96.234	96.0713	5.6483	8.2774	352.38	42.3581	0.1867	99.475	21365547	271038	0.734327	108193	4.26947e+07		2000	36	0.0056	96.0785	95.9158	5.9375	8.5798	332.115	41.9491	0.1925	99.4527	21183884	263675	0.732018	87973.7	3.44766e+07		2010	36	0.0101	94.9451	91.1743	6.2899	8.9465	332.116	41.5096	0.2326	99.4244	21106093	273044	0.728894	134359	5.53e+07
1990	37	0.0151	79.7549	76.9699	18.503	29.2007	144.268	38.6381	0.6028	98.1968	30685075	913885	0.438828	57044	1.42714e+06		2000	37	0.0157	78.8876	76.1883	18.8046	29.6279	145.692	38.9803	0.6168	98.1535	30537058	831964	0.439269	42596.5	1.10578e+06		2010	37	0.0179	77.6094	74.5519	19.1585	30.1317	143.188	39.4669	0.6342	98.0922	30329818	884321	0.433518	40689.9	1.0246e+06
1990	38	0.0203	78.0048	77.8831	21.4276	28.1903	132.021	18.0091	0.5932	97.8924	21852543	666991	0.405134	62368.4	511394		2000	38	0.0114	76.4949	76.4181	21.948	28.8228	134.19	18.9289	0.6143	97.8028	21703246	613333	0.402806	43885.3	380540		2010	38	0.0156	74.5316	74.4574	22.2851	29.233	134.113	20.1159	0.6393	97.7142	21635211	646701	0.400406	41360.5	363347
1990	39	0.0062	76.3965	72.2334	13.1472	11.7678	133.279	28.0505	0.7003	98.6721	9430575	198526	0.568903	24124	2.6644e+06		2000	39	0.0072	74.0602	70.1373	14.5262	12.8428	135.695	34.5904	0.7466	98.4969	9438236	177203	0.57145	21303.3	2.28401e+06		2010	39	0.0113	73.0821	69.2095	15.3312	13.4709	131.834	34.4141	0.7654	98.4013	9432051	204810	0.570877	29006.6	3.20035e+06
1990	40	0.0125	73.8222	73.4538	19.6372	27.9687	89.9229	31.7575	0.7562	97.9902	26534403	665323	0.495317	65271.5	1.70469e+06		2000	40	0.0094	71.0996	70.7299	21.7107	30.7446	85.7855	29.812	0.7992	97.6972	26386316	595967	0.492258	56529.9	1.48802e+06		2010	40	0.0324	62.356	61.6038	21.9263	31.0311	100.182	32.7325	0.9045	97.3601	25369997	616841	0.465798	71449.7	2.00683e+06
1990	41	0.0126	79.0768	73.4581	12.4139	21.0361	153.011	37.0483	0.6339	98.7888	38395610	782955	0.616849	140217	1.36937e+07		2000	41	0.0116	78.5296	72.9405	12.8253	21.6692	151.426	36.5324	0.6483	98.7417	38367314	734103	0.615153	120542	1.15811e+07		2010	41	0.0126	77.6721	72.0977	13.2099	22.2557	152.705	37.0938	0.6694	98.6971	38348759	841637	0.614729	170844	1.71979e+07
1990	42	0.0112	82.8333	43.9702	17.6224	33.9337	122.085	31.8065	0.5415	98.3293	43884726	1.32967e+06	0.442839	77103.7	959815		2000	42	0.011	81.74	43.5278	18.2903	35.1012	122.697	31.4813	0.5604	98.2476	44267760	1.25965e+06	0.44838	64331.9	805253		2010	42	0.0108	80.4153	37.1636	18.7046	35.8231	124.761	31.5233	0.5831	98.1856	44071497	1.35973e+06	0.445368	57548.7	723758
1990	43	0.0074	84.1778	53.8949	14.8855	22.8829	144.711	56.594	0.5415	98.6223	31119764	825055	0.515708	58071.6	1.89883e+06		2000	43	0.009	83.1785	53.0139	15.7083	24.0322	144.177	55.7591	0.5626	98.5346	30864914	755903	0.500646	51031.7	1.68585e+06		2010	43	0.0147	81.6529	51.6619	16.2792	24.8296	144.309	56.8746	0.5932	98.4648	30726930	806277	0.498029	58327.8	1.95945e+06
1990	44	0.0012	98.1078	98.1052	2.3587	4.7923	1406.81	69.3527	0.1063	99.7717	32227748	188523	0.869767	239022	1.81283e+08		2000	44	0.0016	98.0066	98.0026	2.5351	5.0123	1226.63	69.4188	0.1112	99.758	32006220	187186	0.8625	188597	1.4026e+08		2010	44	0.0024	97.5981	97.5906	3.0363	5.627	1012.24	68.3446	0.1299	99.7199	31975295	200564	0.861486	294029	2.33675e+08
1990	45	0.0047	93.5594	93.2656	7.47	8.5547	250.309	41.5497	0.2832	99.3249	15123435	166586	0.74788	79290.3	2.98244e+07		2000	45	0.0047	93.3255	93.0317	7.8955	8.9281	236.353	41.0667	0.2917	99.2895	15181299	157825	0.745721	63530.6	2.35567e+07		2010	45	0.0079	91.2572	90.9535	9.1297	9.9445	239.511	39.0948	0.3592	99.1841	15118995	166649	0.747079	99408.3	3.92661e+07
1990	46	0.0071	90.3759	83.9909	7.3698	8.1679	266.608	64.4994	0.3731	99.3406	14992878	138279	0.780608	93282.8	4.73376e+07		2000	46	0.0071	90.2177	83.8232	7.5672	8.3376	262.176	64.9363	0.3786	99.3256	14876914	132735	0.781967	73223	3.77063e+07		2010	46	0.0254	86.6543	80.156	9.4781	10.0036	252.727	63.6824	0.4853	99.1503	14773621	143414	0.77351	112464	6.24917e+07
1990	47	0.0024	95.2553	94.7844	5.8793	8.495	335.09	37.2605	0.2239	99.4814	25392532	231467	0.806523	143297	5.89996e+07		2000	47	0.002	94.9729	94.5069	6.1261	8.7724	329.703	36.7737	0.2343	99.461	25143023	213546	0.797514	123016	4.96232e+07		2010	47	0.0034	94.3613	93.9636	6.3772	9.0518	338.966	36.6135	0.2559	99.4396	25086790	241847	0.79492	170565	7.21224e+07
1990	48	0.0046	93.2124	93.2015	12.2018	15.2638	121.303	49.1543	0.2838	98.9771	21193033	489689	0.56412	74297.9	3.04254e+06		2000	48	0.0066	92.6825	92.6677	12.6789	15.7924	119.975	48.4275	0.2988	98.9343	21269709	453145	0.565213	65689.2	2.69243e+06		2010	48	0.0091	91.8465	91.8235	13.4188	16.6011	118.896	49.3033	0.3229	98.8687	21206902	523025	0.563309	86896.7	3.65971e+06
1990	49	0.0036	97.1864	96.4627	3.1513	5.911	748.827	43.9358	0.1483	99.6873	28051894	147266	0.824842	213867	1.77501e+08		2000	49	0.0032	97.0643	96.3463	3.2296	5.9997	736.39	43.6021	0.1534	99.6814	28207627	147571	0.827025	172237	1.38828e+08		2010	49	0.0041	96.7774	96.0918	3.5021	6.306	679.925	43.4553	0.1651	99.6643	28189832	159148	0.826216	272064	2.40021e+08
1990	50	0.002	96.9792	96.9232	2.03	3.9357	2026.25	39.2325	0.1491	99.8001	26751134	86444.4	0.904445	225059	1.35843e+08		2000	50	0.002	96.8917	96.8357	2.1197	4.0355	1894.92	39.8729	0.1537	99.7931	26752982	84052.7	0.903131	176454	1.0499e+08		2010	50	0.0044	96.4349	96.3187	2.5636	4.5285	1637.22	41.825	0.1757	99.759	26682901	85955.9	0.900315	280309	1.79509e+08
1990	51	0.0044	86.5888	86.5783	16.0246	26.3458	114.654	17.967	0.4282	98.5657	34902918	1.1175e+06	0.439342	54328.9	589877		2000	51	0.0047	85.654	85.6473	16.6567	27.2955	113.931	17.3493	0.4459	98.4963	34808239	1.04273e+06	0.438231	47125	525871		2010	51	0.0041	84.7196	84.7155	17.0105	27.8249	115.164	16.5101	0.4623	98.4492	34709279	1.14114e+06	0.435944	42010.1	477802
1990	52	0.0066	88.2787	88.2593	12.2339	15.668	204.938	12.84	0.3744	98.9309	21099373	589711	0.469898	43096.9	1.77591e+06		2000	52	0.0057	87.2297	87.2137	12.9063	16.4339	203.164	12.7932	0.3964	98.8612	20977974	564587	0.465508	29770.2	1.30363e+06		2010	52	0.0066	86.8549	86.7862	13.0908	16.6438	202.579	8.0402	0.404	98.8417	20961465	588448	0.464881	24961.8	1.10934e+06
1990	53	0.0137	81.6138	73.7828	7.6178	10.45	399.88	71.5378	0.5618	99.239	21836535	221047	0.751125	129985	4.6249e+07		2000	53	0.0147	81.385	73.6802	7.793	10.6442	384.259	71.901	0.5691	99.2225	21785199	211576	0.742062	101236	3.57186e+07		2010	53	0.0198	80.491	73.3279	8.0813	10.942	381.29	72.9884	0.5966	99.1989	21698088	224578	0.73793	161974	6.22365e+07
1990	54	0.0052	86.2565	85.9219	10.3435	17.406	216.771	63.0807	0.4841	99.0639	40026499	637398	0.677857	191995	8.29025e+07		2000	54	0.0044	85.705	85.3753	10.8724	18.2022	206.589	62.5742	0.5006	99.0137	40114078	598834	0.677908	165812	6.8868e+07		2010	54	0.0104	83.5518	80.9085	11.392	18.9854	215.618	63.4904	0.5586	98.9507	39865913	649711	0.672517	232484	1.01869e+08
1990	55	0.0021	94.408	94.3755	5.108	11.3603	490.659	42.9439	0.253	99.5686	68590837	658418	0.786418	427176	3.08603e+08		2000	55	0.0021	94.273	94.2407	5.2934	11.708	466.288	42.6717	0.2583	99.5535	68658741	605542	0.791182	345456	2.42906e+08		2010	55	0.0041	93.4932	93.4504	5.7098	12.4828	462.845	42.1294	0.2867	99.5182	68535801	642654	0.789327	519128	3.82038e+08
1990	56	0.0061	83.2789	74.5757	17.1285	22.4457	118.211	49.6574	0.5628	98.4022	22504400	593427	0.500357	39669.2	1.52205e+06		2000	56	0.0079	81.7629	73.1743	18.4417	24.0146	115.99	48.7451	0.5935	98.2555	22284422	545832	0.495564	36139.3	1.42744e+06		2010	56	0.0088	80.5936	72.1447	19.0152	24.6976	116.523	49.7939	0.6166	98.1825	22226275	599654	0.494459	42475	1.64102e+06
1990	57	0.0096	82.1981	62.5057	16.4378	16.6968	155.048	54.4938	0.5775	98.4634	12873501	359646	0.470976	22155.8	581484		2000	57	0.0111	81.0233	61.8547	17.0303	17.2407	153.286	53.4671	0.599	98.3873	12913769	346311	0.471391	21517.3	565132		2010	57	0.0133	78.1812	60.5924	17.349	17.5321	157.584	56.2815	0.6505	98.309	12698562	359895	0.461758	22497.6	617112
1990	58	0.0036	84.1246	47.4691	10.5692	13.7278	181.522	57.8625	0.5313	98.9782	21455350	288303	0.697588	129284	3.26645e+07		2000	58	0.0031	84.0361	47.4307	10.6384	13.8048	181.352	57.7692	0.5335	98.9711	21487861	278277	0.699394	98996.5	2.46846e+07		2010	58	0.0051	83.2872	46.7998	11.2151	14.4368	177.227	57.0771	0.5547	98.9128	21447372	297796	0.697584	159207	4.31379e+07
1990	59	0.0042	86.9758	86.9742	14.9571	14.8575	136.825	25.0539	0.4481	98.6463	11930561	291815	0.497861	24936.1	1.91187e+06		2000	59	0.0051	85.367	85.3588	16.2116	15.9331	137.461	23.7793	0.4778	98.5127	11960014	266192	0.495372	19383	1.488e+06		2010	59	0.0118	83.9016	83.8739	16.9512	16.5678	137.624	23.8095	0.5054	98.4308	11918718	280368	0.49272	14283.4	1.19822e+06
1990	60	0.0086	75.5692	75.111	12.6983	24.3087	177.889	41.5733	0.6752	98.7072	50781879	863847	0.66996	227593	6.62036e+07		2000	60	0.0068	75.3011	74.9629	12.816	24.5106	176.818	46.1093	0.7201	98.7035	50789420	852106	0.670991	175026	4.87897e+07		2010	60	0.0122	73.5808	72.5873	13.6074	25.8951	177.134	43.3183	0.7282	98.5866	50627451	903241	0.672139	283824	8.35346e+07
1990	61	0.0078	81.2509	69.2173	17.5246	19.7269	122.355	31.3668	0.5912	98.33	15680744	481091	0.446127	31826.6	326697		2000	61	0.0066	80.6205	68.7026	17.8744	20.0829	122.808	30.8749	0.6022	98.2854	15507925	449552	0.442518	31736.1	339099		2010	61	0.009	79.4427	67.6474	18.3255	20.5416	123.819	32.7706	0.6251	98.2219	15455831	477413	0.439424	31119.4	331971
1990	62	0.0052	81.2054	81.1828	22.9625	38.0848	73.3555	34.3072	0.6007	97.8547	38181948	1.08381e+06	0.461718	81802.5	1.49381e+06		2000	62	0.0047	79.5925	79.5713	24.3796	40.3279	73.2349	33.1756	0.6293	97.6802	37941448	1.03893e+06	0.458204	74100.9	1.36504e+06		2010	62	0.0085	77.867	77.8044	25.1795	41.5933	74.6944	33.5018	0.6566	97.5565	37695262	1.14588e+06	0.45135	92355.7	1.70585e+06
1990	63	0.0225	80.3401	42.2757	24.0165	28.7548	80.5585	30.6653	0.5701	97.7189	18838386	578913	0.420229	39223.9	383032		2000	63	0.0185	79.0631	41.5457	24.7823	29.6117	78.3234	30.4763	0.5892	97.6151	18713910	556766	0.423467	44516.3	435724		2010	63	0.016	77.0049	40.6401	24.9894	29.8434	81.9069	30.5039	0.6177	97.5357	18606532	579609	0.419406	38013.9	372052
1990	64	0.0033	91.8219	91.7129	9.6278	21.8364	218.014	51.4871	0.3388	99.1809	79333454	770290	0.738	300227	2.9168e+08		2000	64	0.0031	91.5602	91.4521	9.7295	22.0443	221.32	51.49	0.3465	99.1709	79554702	714341	0.741739	266124	2.48943e+08		2010	64	0.004	91.044	90.9386	9.8183	22.2183	225.105	52.6567	0.3611	99.1611	79386561	782578	0.739539	347589	3.39448e+08
1990	65	0.0272	79.3562	65.8262	13.9153	18.9257	184.996	49.1245	0.6382	98.664	24985797	329434	0.704215	154358	6.3393e+07		2000	65	0.0349	78.643	65.0974	14.2012	19.2691	182.666	51.3945	0.6611	98.6325	24758038	312848	0.699575	112501	4.84472e+07		2010	65	0.0366	76.934	62.4298	14.3351	19.3909	191.267	48.8945	0.6969	98.587	24673922	350652	0.69719	186345	8.39764e+07
1990	66	0.0263	86.191	85.4343	6.5468	12.2648	540.559	52.4985	0.4833	99.4544	48158194	378966	0.823162	337683	1.48834e+08		2000	66	0.0258	86.0301	85.2738	6.6695	12.454	539.129	52.4007	0.4876	99.4432	48184221	372890	0.81996	268055	1.18865e+08		2010	66	0.0275	85.2523	84.5312	6.727	12.5295	556.076	41.7152	0.4746	99.3948	48102993	403431	0.815487	441624	2.0475e+08
1990	67	0.013	82.381	82.3386	20.743	36.9391	100.543	34.6554	0.5293	98.0592	39987888	1.22066e+06	0.432036	80303.1	704292		2000	67	0.012	81.34	81.2948	20.9422	37.2665	101.013	34.6611	0.5463	98.0202	39805265	1.15343e+06	0.424328	81314.2	716038		2010	67	0.0141	80.1398	55.7548	21.0384	37.4236	104.557	33.9572	0.5626	97.9958	39589747	1.26584e+06	0.419779	63016.4	576554
1990	68	0.0243	62.5716	23.599	14.0794	24.477	252.168	70.3689	0.9549	98.5766	37079706	528387	0.67429	179732	1.87709e+07		2000	68	0.0253	62.1652	23.6295	14.1683	24.6058	252.173	70.233	0.9656	98.5603	36958730	540306	0.676762	155499	1.61494e+07		2010	68	0.0337	58.4681	23.4827	13.9575	24.2658	273.88	70.8916	1.0459	98.502	35998612	499180	0.649285	248045	2.82858e+07
1990	69	0.0076	88.4757	69.8724	10.5015	24.9792	256.93	48.6061	0.4355	99.1002	88211282	994591	0.753101	513715	2.65569e+08		2000	69	0.0091	88.284	69.7396	10.6347	25.267	252.666	50.305	0.4435	99.0908	87887845	941651	0.747972	392014	2.05277e+08		2010	69	0.0196	86.5885	68.7712	11.7628	27.7097	245.572	49.8557	0.4904	98.9853	87670673	1.05262e+06	0.746421	620034	3.30733e+08
1990	70	0.015	93.6606	93.5597	5.718	12.3537	529.443	40.0814	0.2661	99.5031	65988885	390473	0.85364	520279	2.90533e+08		2000	70	0.0156	93.5843	93.4546	5.7693	12.4452	529.444	40.6767	0.2696	99.4988	65710235	364334	0.854373	420480	2.32648e+08		2010	70	0.0187	92.5758	92.2696	6.934	14.5403	512.403	44.0974	0.3079	99.4033	65599494	405216	0.854669	655556	3.75012e+08
1990	71	0.0064	84.236	83.898	6.9032	13.2084	362.111	67.6256	0.5362	99.4492	50810213	427443	0.80038	412423	4.68014e+07		2000	71	0.0064	84.1781	83.8555	6.9206	13.2385	359.726	67.5374	0.5384	99.4477	50402810	430126	0.795195	321186	3.56504e+07		2010	71	0.0066	84.3378	84.0931	6.3453	12.251	363.327	53.529	0.4965	99.429	50599036	437931	0.804841	531783	6.31697e+07
1990	72	0.0014	97.1711	97.1132	4.3628	8.9549	421.719	41.9045	0.1487	99.6303	54939961	445375	0.820635	347680	2.67422e+08		2000	72	0.0014	97.0775	97.0212	4.4143	9.0331	422.949	42.0738	0.1527	99.6265	54807128	445303	0.822141	317167	2.39695e+08		2010	72	0.0071	95.8169	95.6078	4.9096	9.8364	438.712	44.0714	0.2031	99.5884	54500638	455510	0.816338	499534	4.01621e+08
1990	73	0.012	82.6123	65.9768	22.583	28.3759	82.6173	19.8489	0.4883	97.9317	20269254	613541	0.42236	44394	390721		2000	73	0.0111	81.2818	64.8566	23.3871	29.3268	81.7144	19.5225	0.509	97.8263	20254350	609292	0.41911	57370.1	499494		2010	73	0.0107	80.3379	64.0525	23.5343	29.5038	83.6041	19.0419	0.5224	97.7864	20223425	640980	0.417885	35750	321852
1990	74	0.0071	83.9285	83.9228	22.0786	25.7003	72.0699	1.6362	0.4431	97.9644	16133559	490067	0.405692	27088.5	292145		2000	74	0.0077	82.8398	82.826	23.0555	26.7416	70.2598	1.5759	0.4607	97.8507	16234919	482488	0.40814	37041.2	395074		2010	74	0.0099	81.7497	81.7072	23.35	27.0566	71.0836	1.5668	0.4775	97.7964	16155087	519763	0.404597	24652.9	267814
1990	75	0.0152	71.7725	50.179	13.3888	30.6928	231.049	65.8239	0.8192	98.8416	72953737	1.00844e+06	0.694089	457384	1.62596e+07		2000	75	0.0162	71.6134	50.1807	13.3762	30.6657	230.974	66.1995	0.8241	98.8419	73047033	1.0032e+06	0.693036	421494	1.51331e+07		2010	75	0.015	72.182	49.776	12.363	28.4628	246.873	62.0621	0.7912	98.8484	73458921	1.05179e+06	0.703881	689657	2.72364e+07
1990	76	0.0125	87.7835	49.3447	13.8605	25.6132	157.136	46.3855	0.4614	98.7767	48463704	798449	0.665983	309402	3.71497e+07		2000	76	0.0143	87.8311	49.524	13.7901	25.4925	157.136	46.5771	0.4617	98.7857	48513723	783109	0.665773	307577	3.71989e+07		2010	76	0.0145	86.4271	49.212	14.1227	26.0232	160.462	47.2254	0.4958	98.7524	48292659	787001	0.662899	479168	6.19912e+07
1990	77	0.0023	95.9911	83.4368	5.0503	13.9498	472.793	47.4885	0.197	99.5843	111031811	720147	0.839458	950966	2.51367e+08		2000	77	0.0024	95.8225	83.295	5.0439	13.9244	476.384	47.4191	0.2034	99.5853	111069172	711537	0.840174	811156	2.03761e+08		2010	77	0.004	95.0041	82.2595	5.504	14.9485	467.522	46.2087	0.2321	99.548	110974352	734187	0.840019	1.32334e+06	3.61138e+08
1990	78	0.0246	88.841	74.8603	12.0415	11.8124	242.777	54.1551	0.4497	98.9543	11587961	143221	0.721668	101316	4.57274e+06		2000	78	0.0226	88.5279	74.7266	12.1455	11.8926	241.625	54.2977	0.4585	98.9453	11646685	151682	0.729183	91330	4.28373e+06		2010	78	0.0236	89.8514	75.8951	11.0805	10.9941	267.717	53.9322	0.415	99.0373	11695263	159421	0.725573	149782	7.67127e+06
1990	79	0.0027	94.2939	94.2636	7.2774	12.417	309.841	68.9006	0.2575	99.3813	40141282	436605	0.767299	221620	1.35862e+08		2000	79	0.0036	94.2227	94.132	7.3911	12.5797	307.257	69.4641	0.2602	99.3736	39796279	399725	0.766838	184052	1.16267e+08		2010	79	0.0066	93.5073	93.2314	8.3811	13.9997	300.844	68.1117	0.2853	99.2931	39772680	431705	0.766607	255359	1.6097e+08
1990	80	0.0015	95.3519	95.337	7.2109	18.0657	254.932	42.0156	0.2211	99.4001	95794233	940799	0.785245	724583	1.68634e+08		2000	80	0.0017	95.3446	95.3147	7.2497	18.1528	253.204	42.2173	0.2217	99.397	95648199	947450	0.780976	692923	1.61343e+08		2010	80	0.0028	94.6008	94.5723	7.7032	19.129	251.745	42.063	0.2485	99.3584	95523724	981957	0.779787	1.0376e+06	2.51009e+08
1990	81	0.0186	74.5211	73.763	17.7891	27.1116	127.16	53.5212	0.7302	98.202	32722133	545890	0.662949	132074	1.89016e+07		2000	81	0.0201	73.9498	73.1619	18.2788	27.8056	123.891	59.8662	0.7644	98.1745	32543095	490465	0.65303	107333	1.54042e+07		2010	81	0.0291	70.5206	69.0429	20.3916	30.7813	123.751	57.0128	0.822	97.8734	32351700	543946	0.656213	155036	2.38481e+07
1990	82	0.0049	96.7174	57.2566	2.8377	5.742	1142.72	55.9545	0.1679	99.7543	44869329	188108	0.892814	300206	2.9852e+08		2000	82	0.0043	96.5702	57.1459	2.9662	5.9261	1138.95	55.5903	0.1733	99.7454	44932491	182969	0.894855	255433	2.55872e+08		2010	82	0.0061	96.2437	56.8066	3.1981	6.2612	1146.53	43.3278	0.1796	99.727	44894915	191602	0.895611	388175	4.0834e+08
1990	83	0.0059	89.3024	86.5836	13.164	24.5502	148.37	43.4889	0.4226	98.8692	53414057	724841	0.695778	226302	6.16148e+07		2000	83	0.0078	88.7156	85.9172	13.4135	24.978	146.211	44.2572	0.4389	98.8475	53037170	674331	0.687639	208260	5.75309e+07		2010	83	0.0184	86.526	81.4562	15.3188	28.2476	148.698	43.6158	0.4946	98.6698	52811681	716463	0.684749	251790	7.16239e+07
1990	84	0.001	98.0395	98.0325	3.1804	8.0515	680.442	43.9209	0.1106	99.7314	82693923	346249	0.901467	705075	3.13696e+08		2000	84	0.0011	97.8448	97.8362	3.2833	8.2535	685.637	43.1937	0.1191	99.7235	82714144	330080	0.902202	669110	2.96527e+08		2010	84	0.0025	97.4162	97.3818	3.6475	8.9587	703.289	44.7558	0.1377	99.6983	82737142	348085	0.902599	1.07811e+06	5.1542e+08
1990	85	0.0071	93.3578	93.2376	9.9111	22.0545	209.268	64.6187	0.2894	99.1707	78530198	743507	0.770894	566147	1.64687e+08		2000	85	0.0074	93.0701	92.9473	10.0937	22.4301	208.394	40.0594	0.2989	99.1541	78411821	749346	0.770184	580147	1.72452e+08		2010	85	0.0092	91.6723	91.4465	10.4961	23.1645	213.749	40.0458	0.3398	99.1145	77721522	764983	0.760255	815716	2.42524e+08
1990	86	0.0075	92.5683	41.5941	8.5674	19.0516	227.019	44.5149	0.318	99.2622	71830065	728230	0.758164	487774	8.94709e+07		2000	86	0.0076	92.4516	41.5408	8.6783	19.2722	225.739	44.6958	0.3218	99.2528	71577925	724794	0.757623	502338	9.15587e+07		2010	86	0.0076	91.5153	41.3552	9.1699	20.1209	229.284	44.4534	0.3526	99.212	71521119	767825	0.756659	715907	1.41707e+08
1990	87	0.0066	95.236	52.6474	5.3413	8.1211	386.284	44.8773	0.2238	99.5382	27740851	261661	0.797875	189326	3.62532e+07		2000	87	0.008	95.2716	52.6558	5.1003	7.8301	391.632	44.6047	0.2235	99.5575	27802446	247908	0.798601	195269	3.79917e+07		2010	87	0.0115	93.0021	52.3017	6.2966	9.2312	386.952	44.1699	0.3028	99.457	27616004	260882	0.794597	316589	6.85649e+07
1990	88	0.0012	97.8559	97.8431	3.5146	8.1233	598.1	41.9737	0.1183	99.6968	64799930	451085	0.847205	488928	2.0438e+08		2000	88	0.001	97.9146	97.9028	3.4409	7.9838	603.088	42.328	0.1158	99.703	64839689	423183	0.847631	501287	2.09991e+08		2010	88	0.0022	97.4402	97.424	3.8623	8.6141	585.064	42.674	0.137	99.6757	64772598	453601	0.847024	758482	3.36786e+08
1990	89	0.0638	63.7815	55.2085	18.1979	17.9471	232.564	59.0607	0.8889	97.9722	11463820	215744	0.607829	32809.2	1.05788e+06		2000	89	0.0758	60.8196	52.0401	19.4029	19.0121	229.582	60.6082	0.9361	97.7813	11423806	192502	0.608463	28237.6	880605		2010	89	0.1412	52.2182	41.0513	21.2469	20.64	210.675	64.8525	1.0512	97.3396	10916198	190753	0.573049	34862	1.17921e+06
1990	90	0.0409	75.5012	56.4161	23.9641	30.5746	156.802	51.4719	0.7436	97.6236	20782470	544768	0.534823	65422	794739		2000	90	0.0545	69.8955	52.0459	25.6838	32.5833	153.737	51.6439	0.827	97.2803	20440631	497121	0.558389	56265.5	724026		2010	90	0.1104	61.5075	28.9623	30.136	37.7905	130.348	52.8426	0.9223	96.4532	20080498	471203	0.573123	64864.8	892850
1990	91	0.0044	96.2775	95.247	4.6378	7.8424	903.897	26.8193	0.1772	99.6096	37408284	220333	0.874378	131725	3.08125e+07		2000	91	0.0048	96.4302	95.3691	4.4636	7.6084	882.115	28.053	0.1725	99.6236	37504051	206344	0.879735	190686	4.45799e+07		2010	91	0.0089	95.1825	93.6052	5.8103	9.4121	712.584	40.9441	0.2259	99.522	37354400	218267	0.876824	150688	3.45301e+07
1990	92	0.0004	98.889	98.8881	1.9262	5.1174	928.144	44.2631	0.0691	99.8172	61383457	243196	0.912525	423476	2.76201e+08		2000	92	0.0006	98.7937	98.7916	2.011	5.2592	931.888	44.8039	0.0739	99.8108	61348789	240223	0.912009	385737	2.49519e+08		2010	92	0.0006	98.7776	98.7754	2.0536	5.3034	956.999	44.4986	0.0748	99.8086	61348789	257291	0.912008	556595	3.78531e+08
1990	93	0.004	95.1926	93.5716	7.0078	13.0851	337.684	43.5472	0.227	99.4119	45527685	811674	0.66835	164365	3.28413e+07		2000	93	0.004	94.7065	93.0864	7.3787	13.6614	333.226	43.8193	0.2448	99.3815	45315145	783734	0.663142	187933	3.89803e+07		2010	93	0.0077	93.0356	91.454	8.7526	15.8203	321.035	45.1801	0.3013	99.2704	45185322	837339	0.662483	171080	3.40855e+07
1990	94	0.0067	89.8531	89.7176	12.7287	27.0044	172.441	46.6574	0.4022	98.9421	69140436	1.33644e+06	0.637938	220909	2.11124e+07		2000	94	0.0081	89.4672	89.3261	13.1003	27.7388	169.921	46.9085	0.413	98.9096	68997550	1.31184e+06	0.63973	253582	2.52384e+07		2010	94	0.01	88.3386	81.6202	14.292	30.0975	168.734	47.3008	0.4467	98.7982	68709896	1.41299e+06	0.637045	240662	2.26388e+07
1990	95	0.003	98.2194	98.2037	2.2453	5.4179	1156.09	42.5476	0.1005	99.7889	52027386	276616	0.876751	369146	1.28029e+08		2000	95	0.0027	98.1512	98.1358	2.3453	5.5787	1126.86	42.5802	0.1039	99.7811	51765793	283189	0.867498	383164	1.32643e+08		2010	95	0.0017	97.7583	97.7486	2.63	5.9519	1136.56	45.0994	0.1231	99.7646	51844680	292653	0.871749	574706	2.11068e+08
1990	96	0.0184	75.769	67.027	13.2923	20.3085	257.491	57.5545	0.7071	98.7348	32089572	436569	0.719533	154066	1.52935e+07		2000	96	0.0161	75.317	66.6599	13.824	21.039	248.656	56.784	0.7137	98.6742	32218137	409209	0.723933	128448	1.28e+07		2010	96	0.0266	71.4406	63.5386	15.4959	23.3321	226.29	59.9104	0.7959	98.445	31907706	440647	0.722167	175865	1.87933e+07
1990	97	0.0165	80.0673	71.6565	16.4301	42.6678	179.444	45.2147	0.6291	98.4489	93375359	2.5689e+06	0.54898	279668	3.04483e+06		2000	97	0.0185	78.2827	71.5409	17.556	45.4134	171.341	45.634	0.6599	98.31	92636487	2.47438e+06	0.556287	274495	3.11874e+06		2010	97	0.0244	71.7876	35.8205	19.7644	50.7863	158.503	46.0723	0.7575	97.9412	91496774	2.45e+06	0.569807	303048	3.49862e+06
1990	98	0.002	97.6779	97.672	3.8931	7.9446	475.685	41.6381	0.127	99.6618	50264873	320263	0.851083	410449	1.14568e+08		2000	98	0.0028	97.6887	97.6754	3.8292	7.8237	473.404	41.3219	0.1263	99.6679	50322579	311051	0.852399	422407	1.17199e+08		2010	98	0.0038	97.4473	97.426	4.0652	8.1023	472.306	41.2916	0.1366	99.654	50307738	337865	0.852524	597497	1.74305e+08
1990	99	0.0007	97.4536	97.4456	4.3383	7.4817	478.423	68.5523	0.136	99.6254	34983007	239845	0.841564	216224	1.30647e+08		2000	99	0.0007	97.2981	97.2901	4.5144	7.7267	467.8	43.0778	0.1432	99.6106	34933769	227026	0.843959	227075	1.33974e+08		2010	99	0.0011	96.5127	96.4981	5.0369	8.3827	473.481	44.7044	0.1757	99.5726	34893280	234575	0.842668	358254	2.31917e+08
1990	100	0.0011	97.9249	97.9228	3.5142	5.4916	672.48	71.6553	0.1153	99.6785	21841536	154933	0.843054	140190	1.13472e+08		2000	100	0.0017	97.5351	97.5316	3.8441	5.8371	662.329	72.3827	0.1327	99.6536	21809905	129199	0.855851	152303	1.24935e+08		2010	100	0.004	96.2937	96.1069	4.5322	6.5585	675.066	76.9113	0.1835	99.603	21786970	138199	0.853641	235563	2.08425e+08
1990	101	0.0007	98.8353	98.8322	2.2768	4.869	974.31	67.9863	0.0715	99.7902	40688395	159980	0.908104	380604	9.97107e+07		2000	101	0.0007	98.814	98.8109	2.3104	4.9145	971.221	67.8802	0.0725	99.7876	40816182	145224	0.91758	390799	1.00404e+08		2010	101	0.0007	98.749	98.7459	2.3971	4.9775	974.368	67.9013	0.0759	99.784	40819561	154507	0.917742	525138	1.40639e+08
1990	102	0.0006	96.6307	96.6297	5.5594	9.8326	369.953	34.2249	0.1688	99.5309	42952640	301699	0.823089	297158	1.61418e+08		2000	102	0.0006	96.6027	96.6017	5.5776	9.8543	369.954	34.2911	0.1699	99.5295	42781319	305008	0.817305	319643	1.72955e+08		2010	102	0.0012	96.4796	96.4764	5.6989	9.9846	375.695	33.6937	0.1742	99.5215	42762191	327726	0.816714	401321	2.22561e+08
1990	103	0.0121	79.3325	67.4598	11.7	15.9417	357.712	53.0901	0.6322	98.9027	25480122	303150	0.755745	137616	1.26847e+07		2000	103	0.0143	77.8862	66.4155	12.1575	16.4908	351.188	53.8077	0.6598	98.8486	25126408	276335	0.75427	122981	1.1411e+07		2010	103	0.0294	75.5727	62.7711	13.9367	18.5933	309.779	55.1988	0.7087	98.66	24958811	295845	0.753953	156333	1.49662e+07
1990	104	0.0159	94.8723	94.74	6.6172	12.4573	363.526	42.2287	0.2315	99.4298	47904145	381244	0.827732	350862	1.36783e+08		2000	104	0.0156	94.7147	94.5737	6.7772	12.7037	356.769	42.809	0.2384	99.4168	47654155	362058	0.824303	304405	1.19709e+08		2010	104	0.0198	93.2759	87.7206	8.5535	15.4175	329.243	46.1851	0.2936	99.273	47534962	394797	0.822026	413165	1.69662e+08
1990	105	0.0034	96.9929	65.7114	2.4762	6.3644	1161.21	67.0044	0.1499	99.7641	60673579	312914	0.868664	434745	1.18803e+08		2000	105	0.0038	96.2628	65.3078	3.1309	7.4889	1127.88	62.216	0.1764	99.7119	60549447	294000	0.872268	430619	1.15872e+08		2010	105	0.0045	96.0167	65.1965	3.2834	7.7096	1136.07	63.4384	0.1879	99.7018	60515805	324031	0.871676	538421	1.50485e+08
1990	106	0.0021	97.306	97.3002	4.1774	6.9441	623.425	36.8604	0.1402	99.6292	30299066	305771	0.801351	97688.9	1.16858e+07		2000	106	0.0021	97.4916	97.4857	3.9389	6.6484	617.08	38.2025	0.1331	99.6485	30262175	309694	0.797345	134869	1.59916e+07		2010	106	0.0037	96.551	96.5223	5.4138	8.4338	501.091	66.3574	0.1733	99.5357	30144025	332783	0.793613	105570	1.25206e+07
1990	107	0.001	98.9228	98.8856	1.6728	3.9873	1506.17	69.1668	0.0669	99.8344	37441599	186862	0.861063	261133	2.31565e+08		2000	107	0.001	98.8117	98.7745	1.78	4.1252	1522.04	68.6414	0.0726	99.8266	37800644	165178	0.869704	277685	2.40104e+08		2010	107	0.0028	98.6222	98.5756	1.8382	4.1585	1475.54	68.4794	0.0818	99.8249	37783990	175290	0.869532	321875	2.83107e+08
1990	108	0.025	72.1124	33.7597	18.3762	31.5544	165.288	61.5695	0.8313	98.1584	37482303	836737	0.573647	114441	2.57935e+06		2000	108	0.0258	71.8265	24.758	18.6011	31.8919	164.527	61.8732	0.8389	98.1316	37419317	812415	0.578733	114141	2.57212e+06		2010	108	0.0273	70.2248	24.4798	19.2224	32.8432	163.774	62.1756	0.8805	98.0256	37281367	860552	0.576702	132165	2.99453e+06
1990	109	0.0015	98.4648	98.4474	2.7784	6.9601	697.169	41.4326	0.0904	99.7394	62512932	286149	0.888188	444238	3.04439e+08		2000	109	0.0013	98.4276	98.4102	2.8202	7.02	692.101	41.3947	0.0922	99.7367	62348281	275686	0.888409	479954	3.27108e+08		2010	109	0.0015	98.0773	98.06	3.2906	7.7989	684.161	41.7447	0.1084	99.7023	62276489	294893	0.887459	532928	3.74023e+08
1990	110	0.0149	70.8082	20.5593	15.1608	34.8856	301.633	63.3272	0.83	98.5965	69651611	1.17789e+06	0.674388	285377	1.14182e+07		2000	110	0.0154	70.7344	20.3278	15.2931	35.1602	297.256	63.3604	0.8336	98.5823	69223470	1.12425e+06	0.670702	266238	1.10395e+07		2010	110	0.0181	68.7513	21.9121	16.3736	37.4082	293.252	63.4057	0.8695	98.4497	68656794	1.18709e+06	0.671255	334496	1.44405e+07
1990	111	0.0084	91.0067	64.0692	7.9308	17.8859	340.12	47.8527	0.3591	99.3316	72427772	956061	0.739945	469444	5.69498e+07		2000	111	0.0085	90.643	63.8009	8.2204	18.4537	337.163	47.7709	0.3714	99.3065	72408840	907213	0.742123	457517	5.40745e+07		2010	111	0.0214	87.4784	54.5544	10.0361	22.024	304.855	51.6263	0.4732	99.1413	71800204	928949	0.7347	555777	6.83394e+07
1990	112	0.0025	97.4974	96.232	3.9493	9.2218	655.25	41.2554	0.1338	99.6682	72167025	460702	0.858156	552153	1.73418e+08		2000	112	0.0027	97.3989	96.1044	4.0564	9.4165	671.711	41.5082	0.1382	99.6601	71991562	446116	0.855502	547670	1.7163e+08		2010	112	0.0043	96.5487	93.007	4.8593	10.9167	583.732	47.6454	0.1765	99.6001	71852858	474010	0.853294	730340	2.41707e+08
1990	113	0.0012	97.7304	75.7688	2.9165	7.0702	1040.67	42.6339	0.124	99.7099	52878111	224704	0.876191	412765	1.21901e+08		2000	113	0.0015	97.6405	75.6777	2.9857	7.1174	1030.23	42.7174	0.1282	99.7075	52875354	228145	0.870375	398722	1.17432e+08		2010	113	0.001	97.5446	75.6171	3.085	7.2194	1054.25	42.8739	0.1326	99.7026	52875075	244973	0.870557	506961	1.53667e+08
1990	114	0.0069	91.5479	65.9619	7.6866	15.2592	344.37	53.7449	0.3516	99.3695	56309433	566647	0.796936	352152	8.71062e+07		2000	114	0.0084	91.1757	65.6637	7.8953	15.6103	336.624	53.7659	0.3652	99.3513	56073349	541950	0.792387	318921	7.89374e+07		2010	114	0.0093	90.1005	65.4415	9.0155	17.5153	320.574	52.5707	0.4037	99.2496	55815391	573039	0.787547	399372	1.02644e+08
1990	115	0.0085	96.0627	96.0337	4.4954	6.1967	781.847	39.376	0.1791	99.6031	20420128	189384	0.818425	74070.5	1.13163e+07		2000	115	0.0091	95.8026	95.7731	4.76	6.4647	756.626	37.9604	0.1876	99.5815	20434084	199368	0.814599	99243.1	1.48663e+07		2010	115	0.0067	95.5289	95.5024	5.1644	6.8742	713.856	40.6844	0.1981	99.5498	20433892	209473	0.8152	81143.1	1.21079e+07
1990	116	0.0136	86.8201	49.2839	8.9229	9.2921	303.696	73.0033	0.4665	99.1053	10595093	168291	0.697064	28369.4	2.43223e+06		2000	116	0.0126	86.6617	49.7434	9.1767	9.4881	298.936	73.0071	0.4705	99.0829	10436178	178342	0.682602	37467	3.13534e+06		2010	116	0.0157	85.5144	49.5467	10.2099	10.2802	292.516	45.3009	0.5044	98.9823	10419280	181991	0.68361	29373.9	2.4636e+06
1990	117	0.0018	96.8982	96.8971	4.5157	5.3426	547.488	67.4593	0.1594	99.6048	14152576	113694	0.835135	51709.2	6.9598e+06		2000	117	0.0018	97.1044	97.1034	4.3394	5.1948	512.166	68.0873	0.1511	99.6189	14094734	116665	0.828792	66082.4	8.71361e+06		2010	117	0.0018	96.4535	96.4422	5.3469	6.0268	479.061	68.2417	0.1778	99.5371	14030781	118939	0.824718	51410.3	6.83379e+06
1990	118	0.0013	97.718	97.708	3.3464	9.4618	733.175	67.9498	0.1244	99.6908	89357879	440081	0.867874	734294	1.8936e+08		2000	118	0.0012	97.6981	97.6889	3.3581	9.2877	731.74	41.8158	0.1253	99.6972	89425456	429685	0.868071	738010	1.88894e+08		2010	118	0.0009	97.6629	97.6537	3.426	9.3592	750.803	41.7048	0.127	99.6944	89428748	455183	0.868104	982691	2.64719e+08
1990	119	0.0006	98.3481	98.3456	2.8331	8.0239	691.277	39.4752	0.0961	99.7488	94916224	386757	0.896662	784509	2.00247e+08		2000	119	0.0006	98.3176	98.3141	2.8223	7.9957	695.941	39.2407	0.0974	99.7498	94786826	374729	0.89693	749945	1.92642e+08		2010	119	0.0007	98.2012	98.1954	2.976	8.2849	695.961	39.4246	0.1028	99.739	94786179	391546	0.897171	888808	2.30677e+08
1990	120	0.0131	87.9394	50.1946	13.2016	28.0444	263.075	53.9516	0.464	98.8867	65616021	1.27292e+06	0.642504	237710	4.945e+07		2000	120	0.0141	87.4576	49.9549	13.4877	28.5994	260.242	53.764	0.4765	98.8588	65757439	1.22983e+06	0.649263	253166	5.53179e+07		2010	120	0.0134	86.4943	50.0538	14.026	29.6024	255.841	53.4486	0.5016	98.8046	65577604	1.32006e+06	0.649042	302503	6.64844e+07
1990	121	0.0006	97.9706	97.968	2.8598	5.9045	768.948	41.764	0.1138	99.7382	40764367	371926	0.819107	160452	6.8467e+07		2000	121	0.0006	97.8932	97.8906	2.9335	6.0001	759.885	42.2401	0.1176	99.7331	40633897	399184	0.812269	221839	9.66882e+07		2010	121	0.0009	97.1725	97.1647	3.9427	7.4008	620.808	41.3586	0.1488	99.656	40585309	402003	0.811948	166982	7.23238e+07
1990	122	0.0029	90.6169	62.914	6.8318	10.1713	376.2	39.9378	0.3629	99.3908	27072076	502648	0.654322	75376.5	5.90466e+06		2000	122	0.0024	90.4763	62.9828	7.0221	10.4069	369.401	40.9079	0.3688	99.3762	27109394	524781	0.651294	108585	8.43618e+06		2010	122	0.0057	88.5108	61.8328	9.2083	13.0902	312.072	68.3082	0.4284	99.185	27082548	537259	0.652082	80085.9	6.11312e+06
1990	123	0.0037	96.5772	96.4149	5.0069	12.1223	488.222	44.4801	0.1726	99.593	86277712	578646	0.843496	734182	2.0138e+08		2000	123	0.0049	96.0942	95.9304	5.2865	12.6941	477.565	43.9917	0.1907	99.5702	86136562	565892	0.838567	743725	2.03062e+08		2010	123	0.0136	93.3585	90.5115	6.9447	16.101	417.834	46.7197	0.2811	99.4359	85563029	569737	0.830779	992769	2.89772e+08
1990	124	0.0078	91.2854	62.943	10.2863	18.9821	251.488	43.8602	0.3531	99.1245	50140113	769627	0.701536	244224	2.03226e+07		2000	124	0.0094	90.7854	62.6441	10.626	19.5408	249.616	44.4058	0.3696	99.0951	49927674	733580	0.692938	231851	1.94193e+07		2010	124	0.0179	89.4483	38.6802	12.271	22.2423	237.51	43.782	0.4099	98.9465	49619505	770072	0.690528	302313	2.62095e+07
1990	125	0.0024	96.86	96.838	5.0652	12.8832	442.776	67.0699	0.1612	99.5712	88302255	968354	0.774632	603067	1.30196e+08		2000	125	0.0033	96.6162	96.566	5.2414	13.2558	439.794	67.2026	0.171	99.5568	88200763	925330	0.771711	595773	1.25814e+08		2010	125	0.0065	95.7652	95.5326	6.3118	15.5079	404.844	39.8399	0.2028	99.4711	88027332	971007	0.76954	665629	1.43675e+08
1990	126	0.0088	93.6655	60.9826	6.0387	12.9967	392.228	46.3422	0.2814	99.4842	63060031	576337	0.795331	509362	4.35947e+07		2000	126	0.0097	93.2241	60.7916	6.4478	13.7274	381.164	45.698	0.2961	99.4499	62985181	545989	0.796666	509798	4.40528e+07		2010	126	0.0257	90.707	59.4267	8.9452	18.1989	346.442	43.0015	0.3722	99.2355	62574558	563803	0.789525	573312	4.85923e+07
1990	127	0.0073	89.9985	49.2331	8.2568	14.3717	397.506	74.5298	0.3912	99.2568	38973409	441861	0.760987	147263	7.70944e+07		2000	127	0.0079	89.3882	49.2186	8.6359	14.905	398.47	73.7458	0.4099	99.2214	38887231	414466	0.760126	173801	9.09255e+07		2010	127	0.0133	87.9115	48.7064	9.6926	16.4038	390.93	73.6746	0.4523	99.1305	38825700	440585	0.759344	191010	1.0301e+08
1990	128	0.0055	94.7392	94.423	5.6043	13.9993	586.389	73.6964	0.2396	99.5364	92429522	668271	0.844073	332055	1.77281e+08		2000	128	0.006	94.4414	94.1419	5.7755	14.3672	580.342	45.6394	0.2502	99.5228	92425529	670065	0.841062	444640	2.3992e+08		2010	128	0.0071	93.9719	88.2776	6.3288	15.5369	562.936	46.1486	0.2672	99.4779	92382164	698371	0.841227	355744	1.84378e+08
1990	129	0.0118	89.6116	41.906	9.1706	17.3309	302.523	43.7094	0.4048	99.2051	51564765	677404	0.710194	147334	3.41181e+07		2000	129	0.0116	89.54	41.782	9.1233	17.2657	301.099	43.5611	0.4073	99.2074	51515695	690478	0.704782	211592	4.81005e+07		2010	129	0.0129	86.999	39.9216	10.9969	20.344	285.636	71.2583	0.4765	99.0361	51353168	731855	0.704269	160963	3.71902e+07
1990	130	0.0031	97.1945	54.3197	3.1624	8.338	1268	40.1765	0.1424	99.7275	88343839	397225	0.902467	405038	3.28517e+08		2000	130	0.003	97.1768	54.3167	3.1769	8.3646	1272.82	39.1494	0.1425	99.7265	88438695	370081	0.907352	393313	3.09032e+08		2010	130	0.0036	97.0633	54.2561	3.3773	8.7665	1212.88	40.6482	0.1479	99.7123	88405864	393453	0.906869	472866	3.77615e+08
1990	131	0.0025	97.6105	65.359	3.0168	8.3037	1087.03	39.1543	0.1261	99.7388	92972152	536629	0.871518	600525	1.92429e+08		2000	131	0.0025	97.5984	65.351	3.0324	8.3357	1072.36	39.4555	0.1268	99.7377	93171406	519893	0.873605	567183	1.81362e+08		2010	131	0.006	97.0912	64.9122	3.871	10.0989	1138.97	41.222	0.149	99.6726	93055110	559764	0.872524	739181	2.39073e+08
1990	132	0.008	92.7397	85.039	8.6231	16.4256	270.222	55.2957	0.328	99.2676	49375070	982089	0.613626	123182	1.29636e+07		2000	132	0.008	92.4048	84.6954	8.8504	16.8002	267.328	54.998	0.3391	99.2469	49166626	1.00976e+06	0.616657	179558	1.94568e+07		2010	132	0.01	90.0543	82.7095	11.1551	20.6296	234.534	54.4231	0.4134	99.0454	49015011	1.03994e+06	0.619191	128525	1.39546e+07
1990	133	0.0028	97.6628	97.5814	4.1136	9.7221	482.965	35.5358	0.124	99.6495	72635275	526426	0.83588	620266	1.35518e+08		2000	133	0.0028	97.451	97.3725	4.2985	10.0874	472.914	35.6924	0.1329	99.634	72579994	525345	0.835333	635238	1.40193e+08		2010	133	0.0102	96.195	95.8556	5.9683	13.1913	420.295	35.7683	0.1811	99.5023	72043301	531312	0.826687	801714	1.84447e+08
1990	134	0.0006	99.4868	99.4855	0.7239	3.5984	7178.68	40.2325	0.0361	99.9031	87485470	240917	0.93163	372817	3.9525e+08		2000	134	0.0006	99.4371	99.4358	0.7809	3.7136	7341.81	39.3043	0.039	99.8987	87321713	242140	0.932703	517562	5.44222e+08		2010	134	0.0011	99.0634	98.8955	1.2437	4.6094	5384.14	38.1758	0.0596	99.8654	87305772	249593	0.932627	415395	4.30191e+08
1990	135	0.0009	99.2332	99.229	1.4958	4.0578	2905.99	29.4694	0.0486	99.8378	42591210	159926	0.903763	193666	2.13359e+08		2000	135	0.0009	99.2337	99.2296	1.4957	4.0497	2879.83	29.7512	0.0486	99.8382	42684579	169281	0.901071	217691	2.3876e+08		2010	135	0.0053	98.4121	98.3923	1.9917	4.7245	2732.2	59.2813	0.0883	99.8039	42701908	176102	0.902079	263109	2.87311e+08
1990	136	0.0022	96.6795	68.9456	4.3473	10.6739	501.599	40.3113	0.1694	99.6134	74315457	524775	0.830715	575779	1.81169e+08		2000	136	0.0024	96.4767	68.8466	4.6188	11.1877	483.45	40.4952	0.1777	99.5924	74531066	524908	0.833067	599810	1.91537e+08		2010	136	0.0054	95.8339	63.6199	5.8043	13.453	451.521	38.4259	0.2023	99.4995	74378275	556322	0.831316	649213	2.12049e+08
1990	137	0.0013	98.6155	98.5925	1.7271	5.2837	3241.43	23.2039	0.0771	99.8328	80580082	176077	0.936453	434999	9.70267e+08		2000	137	0.0012	98.6037	98.5822	1.7249	5.2722	3189.44	23.8267	0.0778	99.8333	80852549	168895	0.938937	545042	1.18452e+09		2010	137	0.0023	97.7646	51.2537	2.2932	6.3205	2938.13	36.5966	0.1166	99.7925	80693202	174412	0.938312	561921	1.24201e+09
1990	138	0.0004	99.5098	99.5069	0.952	4.1849	2806.7	62.1423	0.034	99.8642	65687269	296289	0.878065	302989	4.11011e+08		2000	138	0.0006	99.2434	99.2381	1.1116	4.4658	2744.68	60.7502	0.0486	99.8519	65659823	293075	0.878332	345708	4.68802e+08		2010	138	0.001	98.8183	98.8145	1.4966	5.1086	2547.7	61.5813	0.0708	99.8242	65616549	304235	0.87918	407144	5.61785e+08
1990	139	0.0018	98.8573	98.8458	1.7597	5.8598	1757.22	65.5049	0.0698	99.8152	81490218	500008	0.850258	398137	3.84354e+08		2000	139	0.0018	98.804	98.7902	1.7976	5.9329	1757.22	66.6622	0.0727	99.8127	81206603	506094	0.847634	439313	4.20211e+08		2010	139	0.0016	98.5254	98.4966	2.1518	6.628	1713.9	44.2988	0.0873	99.7867	81165725	530586	0.847436	531809	5.17016e+08
1990	140	0.0023	97.542	49.0388	1.3108	3.4667	5299.27	51.6494	0.1265	99.8484	28746142	99432.9	0.908338	133833	2.11855e+08		2000	140	0.0087	96.3425	48.3345	1.8352	4.0771	3561.8	58.9357	0.183	99.8165	28622683	94842.3	0.900898	178614	2.81568e+08		2010	140	0.011	95.0767	47.7507	2.6209	4.9681	2896.99	56.6877	0.228	99.7628	28510334	99904.3	0.902044	156463	2.46304e+08
1990	141	0.0016	98.1144	43.6428	2.9382	8.8386	713.376	40.6068	0.106	99.7152	87223001	687747	0.815762	445448	2.30374e+08		2000	141	0.0019	98.0405	43.6455	2.9713	8.9072	718.632	41.2182	0.1094	99.7132	87189203	688411	0.81435	490218	2.36185e+08		2010	141	0.0034	97.5768	43.6244	3.4924	9.9663	664.116	40.8537	0.1293	99.6745	87097147	723718	0.813578	465721	2.419e+08
1990	142	0.0029	97.4957	97.469	4.4534	8.3798	462.155	43.4957	0.1344	99.6249	43028648	460744	0.76765	322232	4.097e+07		2000	142	0.004	97.2597	97.2111	4.6495	8.6674	457.335	43.9598	0.1444	99.6103	43083388	451051	0.77084	328473	4.08992e+07		2010	142	0.014	96.3985	96.1064	6.0623	10.7321	413.662	40.397	0.1775	99.5003	42988129	483757	0.768414	335150	4.19305e+07
1990	143	0.0048	96.7549	71.4032	3.8027	9.3367	670.616	43.7078	0.1654	99.6693	76870739	349342	0.874131	428140	1.45407e+08		2000	143	0.0049	96.7364	71.3835	3.825	9.3801	665.306	43.5346	0.1661	99.6672	76842664	344894	0.874366	430566	1.41406e+08		2010	143	0.0036	96.8822	71.6851	4.1081	9.907	660.827	42.4843	0.1606	99.6468	76689108	370461	0.872721	487168	1.64502e+08
1990	144	0.0021	98.0126	56.3524	2.2209	4.6522	2014.81	54.2274	0.1086	99.79	36987687	137630	0.888282	205701	1.45359e+08		2000	144	0.0021	97.9779	56.3376	2.2873	4.7346	1918.21	35.1149	0.1106	99.7852	37037966	140674	0.884593	206751	1.42988e+08		2010	144	0.0025	98.0012	56.4626	2.2863	4.6879	1892.44	38.274	0.1078	99.79	37033298	148175	0.885478	243977	1.71952e+08
1990	145	0.0002	99.3866	68.2363	0.6117	3.1932	15447.1	22.8528	0.0389	99.927	108140643	312292	0.917549	588131	1.37034e+09		2000	145	0.0002	99.3767	68.2369	0.6272	3.2263	15155.7	26.1124	0.0398	99.926	107760598	334692	0.912762	782344	1.81869e+09		2010	145	0.0007	98.5935	67.7573	1.1523	4.3906	8826.99	28.0391	0.0784	99.887	107469460	351115	0.913132	655578	1.53096e+09
1990	146	0.0009	98.5862	98.5813	2.6073	6.3807	690.863	43.4056	0.0846	99.7524	56150162	281469	0.876221	397179	2.23219e+08		2000	146	0.0026	96.8354	96.7254	3.1801	7.3152	681.045	42.8827	0.1579	99.705	55796024	269979	0.880294	411921	2.32205e+08		2010	146	0.003	96.5958	96.4808	3.7642	8.2618	648.278	43.4588	0.1696	99.66	55777985	284415	0.880235	466610	2.73521e+08
1990	147	0.0004	98.6338	98.6338	1.6562	3.9607	6362.58	25.2874	0.0769	99.8265	35716688	106254	0.926216	77744.3	1.03597e+08		2000	147	0.0004	98.6339	98.6339	1.6612	3.9671	6214.62	25.2519	0.0769	99.8262	35674559	99039.7	0.925726	108839	1.43123e+08		2010	147	0.0015	98.4635	49.9701	1.7777	4.0981	5344.85	28.6537	0.0864	99.8187	35663325	108508	0.925913	96594.6	1.26828e+08
1990	148	0.0024	97.6607	59.3687	3.3099	9.4349	617.682	44.5088	0.1277	99.7098	98981213	680676	0.837774	632197	2.64843e+08		2000	148	0.0031	97.5071	59.3011	3.5018	9.8501	594.49	46.964	0.1354	99.6949	98982062	684561	0.839294	627243	2.62815e+08		2010	148	0.0055	97.0291	58.9257	4.147	11.2497	557.339	45.1209	0.156	99.6458	98891126	716218	0.83858	639194	2.6779e+08
1990	149	0.0002	99.824	99.824	0.3234	2.9591	5323.96	40.8172	0.0142	99.9227	78507796	255371	0.91756	443634	3.37928e+08		2000	149	0.0002	99.8257	99.8257	0.3171	2.9375	5526.82	35.2893	0.0139	99.9235	78478079	254761	0.917236	555617	4.23262e+08		2010	149	0.001	98.797	54.623	1.6898	5.5044	3054.38	65.9754	0.0727	99.8218	78369944	262710	0.916851	555471	4.28019e+08
1990	150	0.002	98.0178	81.8347	2.8392	7.9406	937.107	42.2612	0.1098	99.7483	91073947	445120	0.893007	584416	4.49995e+08		2000	150	0.002	98.0203	81.8376	2.8334	7.9245	935.837	68.486	0.1096	99.7491	91292580	406342	0.897859	568273	4.25816e+08		2010	150	0.0029	97.8037	81.6949	3.0287	8.3196	909.92	46.7642	0.1211	99.7354	91221734	431916	0.897103	608529	4.57617e+08
1990	151	0.0017	98.7841	98.7608	1.9854	6.6964	1338.32	69.0597	0.0736	99.8063	99373862	557541	0.862208	506449	2.31476e+08		2000	151	0.0017	98.7653	98.7407	2.0023	6.7326	1340.69	69.7371	0.0746	99.8052	98962623	571813	0.860154	549996	2.55657e+08		2010	151	0.002	98.6562	98.6233	2.129	6.9922	1312.83	46.0179	0.0807	99.7961	98992531	614266	0.861261	556204	2.5479e+08
1990	152	0.0011	99.1868	87.2393	1.487	5.0006	2467	34.2141	0.0519	99.8395	73962248	381710	0.87006	413176	2.02915e+08		2000	152	0.0012	99.1783	87.2303	1.4957	5.0169	2456.23	35.4093	0.0526	99.8388	74178186	374513	0.872665	459368	2.22816e+08		2010	152	0.0012	99.0608	87.1465	1.587	5.1784	2403.76	42.2031	0.0598	99.8327	74170284	395680	0.872885	528015	2.58304e+08
1990	153	0.0005	99.6201	99.618	0.4201	3.3207	8553.34	39.8076	0.027	99.9066	73508617	305655	0.867707	389510	3.36444e+08		2000	153	0.0005	99.5914	99.5902	0.4302	3.3365	8553.38	35.7917	0.0285	99.9059	73655595	311391	0.868718	508031	4.47768e+08		2010	153	0.0018	98.9564	98.9427	1.615	5.5227	2880.74	34.1853	0.064	99.8164	73540690	327622	0.867203	477021	4.07597e+08
1990	154	0.0004	99.2339	99.2339	1.3358	3.8985	1727.42	42.9839	0.0507	99.836	36849834	240008	0.832644	210659	7.22785e+07		2000	154	0.0004	99.1671	99.1671	1.4109	4.0004	1706.73	42.7461	0.0544	99.83	37143205	216601	0.843846	238369	7.94908e+07		2010	154	0.0011	98.9571	98.9419	1.8172	4.5369	1619.48	43.8953	0.0653	99.8001	37131414	234277	0.843495	262230	8.73798e+07
1990	155	0.0033	99.2789	94.1127	0.8716	2.5263	5819.12	40.4747	0.0448	99.8923	21392095	42562.5	0.916843	41386.3	8.79173e+07		2000	155	0.0033	99.2789	94.1127	0.8716	2.5263	5819.12	40.4747	0.0448	99.8923	21370663	54947.3	0.911679	53684.7	1.09254e+08		2010	155	0.0033	98.596	93.4201	1.8222	3.533	4875.48	36.5777	0.0777	99.8193	21335200	61484.4	0.911677	51082.4	1.04993e+08
1990	156	0.0006	98.8138	69.7653	0.9553	4.5058	5986.06	42.6975	0.0694	99.8744	86661526	773090	0.779881	379043	6.64353e+08		2000	156	0.001	98.7382	69.6767	1.0116	4.6158	5642.62	48.646	0.0745	99.8711	86692930	770546	0.780971	530036	9.33801e+08		2010	156	0.0025	97.3103	68.6194	1.5511	5.6775	3701.21	49.5793	0.1387	99.8344	86487082	814860	0.781922	448476	7.79781e+08
1990	157	0.0021	98.3709	98.3639	2.918	8.0028	669.267	40.701	0.0945	99.7487	90892483	809552	0.817624	470283	3.46673e+08		2000	157	0.0022	98.3033	98.2952	2.9641	8.0947	668.019	42.0244	0.0982	99.7453	91094586	782610	0.818664	460626	3.36686e+08		2010	157	0.0049	97.759	94.4854	3.8768	10.0059	653.98	42.3667	0.1233	99.6761	91001811	823776	0.81762	454166	3.30225e+08
1990	158	0.0016	98.2385	98.2311	3.1216	6.3663	656.408	45.7142	0.1011	99.7148	39907306	304569	0.815902	204098	2.11296e+08		2000	158	0.0019	98.148	98.1317	3.1738	6.4355	650.996	45.3335	0.1051	99.7112	40087829	293424	0.821668	209180	2.14149e+08		2010	158	0.0048	97.7239	97.256	3.7984	7.309	610.706	74.0319	0.1243	99.6651	40067036	309768	0.821431	192218	1.92693e+08
1990	159	0.0015	99.3764	99.3471	0.9717	3.0817	4179.22	58.3351	0.0415	99.8627	27165773	138288	0.893897	67061.1	1.08301e+08		2000	159	0.0015	99.3786	99.3493	0.9662	3.0767	4179.22	58.5282	0.0414	99.863	27140796	141740	0.89361	90506.1	1.4556e+08		2010	159	0.0015	99.2618	67.6199	1.1416	3.2637	3792.28	60.0578	0.0483	99.8502	27144175	145680	0.893854	77534	1.22371e+08
1990	160	0.005	97.035	96.9776	4.4332	9.0856	440.744	44.2225	0.1541	99.6196	54216037	303454	0.862909	373110	1.54e+08		2000	160	0.005	96.7783	66.997	4.5545	9.2815	446.833	44.1867	0.1648	99.6103	54363514	278890	0.866775	388641	1.6144e+08		2010	160	0.0133	95.2563	65.6874	6.0152	11.6485	407.037	39.3692	0.2179	99.4943	54214250	290585	0.863448	426670	1.79479e+08
1990	161	0.0005	99.7782	99.7782	0.5664	2.2512	10302.9	21.2139	0.0163	99.915	24413041	91940.9	0.919502	62390.1	1.5324e+08		2000	161	0.0005	99.7436	99.7436	0.6247	2.3156	9321.63	19.7543	0.0184	99.9106	24450036	87434.2	0.921056	86250.4	2.08167e+08		2010	161	0.0005	99.3556	99.3556	1.1866	2.9283	6750.22	19.3575	0.0402	99.8684	24453415	93166.9	0.921331	74988.3	1.79525e+08
1990	162	0.0003	99.8701	99.8701	0.295	2.1041	19425	16.5374	0.0102	99.9389	39868527	97612.8	0.945424	125618	4.78996e+08		2000	162	0.0003	99.8715	99.8715	0.2919	2.0999	20812.5	21.9071	0.0101	99.9391	39860648	97341	0.944696	167349	6.40767e+08		2010	162	0.0007	99.7263	99.7263	0.5218	2.3984	17139.9	40.143	0.0204	99.9222	39839334	103916	0.944101	144128	5.4579e+08
1990	163	0.0003	99.4725	99.4719	0.8562	3.8886	2888.95	39.0009	0.0363	99.8866	76659968	457326	0.830312	375895	2.86071e+08		2000	163	0.0005	99.4426	99.4415	0.896	3.9656	2888.94	38.353	0.038	99.8835	76622851	477105	0.831491	435978	3.28067e+08		2010	163	0.0007	99.3819	99.3793	0.9336	4.0134	2779.97	36.4755	0.0412	99.8816	76587471	522344	0.830589	468502	3.5599e+08
1990	164	0.0006	99.5686	99.5672	0.6965	3.4062	5846.44	48.5409	0.0304	99.8977	65712629	344315	0.848936	341052	2.31716e+08		2000	164	0.0004	99.5887	99.5878	0.6474	3.3106	6446.11	35.8378	0.0296	99.9019	65731772	362433	0.84566	397183	2.68342e+08		2010	164	0.0002	99.3955	99.3955	0.7773	3.513	6529.91	37.7152	0.0411	99.8931	65727741	379952	0.845949	441966	3.02598e+08
1990	165	0.002	97.5906	71.8335	3.5219	9.1961	554.611	43.1737	0.1307	99.6896	77238226	828153	0.756839	438075	1.91644e+08		2000	165	0.0025	97.2415	71.5898	3.8244	9.801	533.899	43.8748	0.146	99.6666	76978211	808921	0.754527	436820	1.90132e+08		2010	165	0.0141	96.4976	70.5796	4.7223	11.5895	477.621	43.4421	0.1765	99.5972	76848461	846967	0.752814	420210	1.78153e+08
1990	166	0.0003	99.9261	99.9261	0.1406	1.9097	11751.8	60.6242	0.0066	99.9506	39407742	236436	0.815808	165029	1.77928e+08		2000	166	0.0003	99.9184	99.9184	0.1538	1.9278	10536.1	62.798	0.0072	99.9497	39285066	264699	0.804421	221993	2.44021e+08		2010	166	0.0007	99.5209	99.4786	0.6665	2.6321	6235.68	58.9788	0.033	99.9119	39449261	266797	0.813242	201753	2.17339e+08
1990	167	0.0006	99.5472	99.5472	0.7466	2.3423	2988.87	55.754	0.0318	99.8971	18288122	157966	0.823211	39224.4	4.1527e+07		2000	167	0.0006	99.5402	99.5402	0.7582	2.3537	2932.47	55.3975	0.0322	99.8962	18290090	167304	0.819481	52218.8	5.48959e+07		2010	167	0.0006	99.4689	99.4689	0.8008	2.3809	2878.24	53.1291	0.0358	99.8942	18300227	171034	0.820526	46659.1	4.90078e+07
1990	168	0.0023	96.2413	57.9781	2.0171	4.1488	3290.75	62.0184	0.1768	99.7954	24773694	428274	0.651563	79068.2	7.67048e+07		2000	168	0.0075	94.8959	56.9515	2.8648	5.1255	2275.52	75.3272	0.2355	99.7264	24730769	434366	0.642305	109603	1.07182e+08		2010	168	0.0037	92.9875	56.2209	3.7791	6.1659	1632.84	77.7438	0.299	99.6538	24551191	437558	0.646741	91765.7	9.0117e+07
1990	169	0.0004	99.5849	99.5846	0.6553	3.3367	4915.02	41.8944	0.0304	99.9022	63066696	786158	0.714906	211095	2.75633e+08		2000	169	0.0004	99.5061	99.5057	0.7353	3.4734	4691.63	44.5365	0.0354	99.8964	62924267	827120	0.709397	299701	3.93558e+08		2010	169	0.0017	98.6469	98.6331	1.3177	4.4598	3463.74	46.9613	0.082	99.856	63014305	834619	0.714416	250374	3.23116e+08
1990	170	0.0005	99.3676	99.3635	1.2625	3.9278	2547	46.6839	0.0434	99.8647	56591779	124416	0.942553	379374	3.27625e+08		2000	170	0.0007	99.2649	99.26	1.3879	4.1327	2413.72	45.7721	0.0492	99.8551	56738398	113685	0.946554	395264	3.37857e+08		2010	170	0.0012	98.9631	98.9506	1.9394	5.0171	2594.76	41.5428	0.065	99.8152	56721692	117553	0.946554	346917	2.91991e+08
1990	171	0.0048	97.7588	46.2755	3.0897	6.6427	1518.28	54.3922	0.1213	99.7214	48285908	332478	0.851931	252255	8.92244e+07		2000	171	0.0048	97.6902	46.2341	3.1728	6.7658	1476.11	57.7929	0.1246	99.7158	48118527	336478	0.851412	255396	8.84368e+07		2010	171	0.0065	96.5144	45.3205	4.0011	8.0247	1338.06	45.1115	0.1763	99.6533	47977932	345004	0.848083	239529	8.42054e+07
1990	172	0.0002	99.1551	99.1551	1.9144	4.973	634.497	40.2323	0.0549	99.8137	53624060	203601	0.900598	321422	4.30531e+08		2000	172	0.0012	97.4221	97.3408	2.5864	6.048	793.428	42.8993	0.1353	99.7593	53384415	197168	0.903961	338901	4.50383e+08		2010	172	0.0017	97.2887	97.2032	2.9616	6.6393	749.036	42.8622	0.1423	99.7306	53373946	206239	0.903961	383471	5.19418e+08
1990	173	0.0004	99.4653	99.4651	0.6208	3.0773	7221	56.6202	0.0369	99.908	61502033	314054	0.884498	396357	1.179e+08		2000	173	0.0004	99.3932	99.393	0.6873	3.1863	6796.26	58.9996	0.0412	99.903	61595670	302254	0.888441	462812	1.35844e+08		2010	173	0.0006	99.2917	99.2896	0.7798	3.3311	6080.89	64.4742	0.047	99.8968	61677355	302053	0.891482	363752	1.05139e+08
1990	174	0.0008	99.0311	99.0263	1.7149	6.082	1737.64	41.1859	0.0609	99.8222	98253267	269862	0.915473	612037	3.02252e+08		2000	174	0.0011	98.9216	98.9129	1.8311	6.3248	1750.03	40.9124	0.0666	99.8135	97918888	277908	0.914466	664628	3.23041e+08		2010	174	0.0008	98.9454	98.9408	1.7624	6.1682	1801.39	42.7289	0.0658	99.819	97936645	281951	0.915078	529736	2.58379e+08
1990	175	0.0026	96.9701	68.4282	1.2342	3.509	5653.7	40.8771	0.1434	99.8672	36612021	581989	0.676521	115582	8.16564e+07		2000	175	0.0026	96.78	68.2923	1.4035	3.7435	4259.64	46.9155	0.1548	99.8539	36501853	632991	0.671277	156360	1.08928e+08		2010	175	0.0026	95.8287	67.8363	2.0501	4.614	2613.14	71.3899	0.1927	99.8027	36508077	626257	0.675998	132133	9.29436e+07
1990	176	0.0007	99.8629	99.8371	0.1887	2.2307	12029.9	61.1052	0.0112	99.9305	35134713	314120	0.781242	136399	2.13296e+08		2000	176	0.0007	99.6993	99.6736	0.3115	2.3908	11067.6	62.6526	0.0224	99.9217	35152250	316758	0.780489	174855	2.68284e+08		2010	176	0.0004	99.0923	99.0923	0.9392	3.2113	4256.71	69.0279	0.0578	99.8767	35315545	311244	0.790469	162330	2.43437e+08
1990	177	0.0006	99.7122	99.7122	0.3921	2.244	7295.51	57.13	0.0213	99.9085	21800431	148229	0.832928	194357	3.66876e+07		2000	177	0.0006	99.6679	99.6679	0.4464	2.2997	6453.72	58.7517	0.0242	99.9044	21800271	153458	0.829298	222585	4.22122e+07		2010	177	0.0006	99.6544	99.6544	0.4784	2.3266	6214.58	57.8907	0.025	99.9023	21798659	157020	0.829583	164783	3.09983e+07
1990	178	0.0039	98.9068	85.0405	1.7056	3.6541	1656.67	74.4827	0.0677	99.7997	19917825	120783	0.857315	110259	3.34797e+07		2000	178	0.0033	98.7689	84.9973	1.8406	3.7866	1539.51	80.0989	0.0749	99.7923	19906217	127453	0.85021	125723	3.74479e+07		2010	178	0.0039	98.6624	84.9286	1.9106	3.8385	1656.71	80.5067	0.0802	99.7881	19901412	128271	0.84988	108498	3.26571e+07
1990	179	0.0002	99.8839	99.8839	0.1388	2.4873	16092.9	45.187	0.0101	99.9297	53525153	286192	0.874474	416211	241953303		2000	179	0.0002	99.8712	99.8712	0.1497	2.502	16092.9	43.3579	0.011	99.9289	53370642	297761	0.868691	503421	2.90313e+08		2010	179	0.0002	99.0421	99.0421	0.9063	3.6905	11495.1	38.064	0.0599	99.8719	53416337	300629	0.873647	370142	2.11526e+08
1990	180	0.0007	99.2688	70.1	0.8686	3.2864	6695.38	55.8757	0.0476	99.8967	54731284	423606	0.782697	200629	2.87198e+08		2000	180	0.0007	99.0989	69.9697	1.0148	3.5231	5713.4	72.0621	0.0575	99.8878	55431074	428189	0.817257	260752	3.60337e+08		2010	180	0.0149	97.9303	68.6167	2.238	5.5078	1956.65	67.0664	0.1128	99.7984	55264790	423087	0.815796	251161	3.48483e+08
1990	181	0.0003	99.4802	99.4802	0.4563	2.9174	10994.9	66.6431	0.0356	99.8964	39975626	250675	0.827295	203156	5.35146e+07		2000	181	0.0003	99.4533	99.4533	0.4932	2.9685	10615.7	66.068	0.0372	99.8935	40065614	234810	0.833974	281043	7.02136e+07		2010	181	0.0006	99.2357	99.235	0.7313	3.2985	7329.84	63.1497	0.0494	99.8759	40048959	244823	0.834766	214842	5.34863e+07
1990	182	0.0027	97.1146	73.683	2.1776	6.624	3247.51	36.4497	0.1438	99.8031	85424617	1.71733e+06	0.625482	253175	8.78459e+07		2000	182	0.0032	96.861	73.51	2.3434	6.9797	2849.35	39.9763	0.1567	99.7903	84946534	1.84148e+06	0.620346	318422	1.10586e+08		2010	182	0.0169	95.0755	72.8545	3.6306	9.7057	1649.01	46.3057	0.2309	99.6921	84480684	1.78318e+06	0.61775	284939	9.8105e+07
1990	183	0.0003	99.9001	99.8995	0.1583	2.3647	12649	41.5668	0.0086	99.9539	101174112	866533	0.808858	434096	3.93986e+08		2000	183	0.0003	99.8906	99.89	0.1698	2.3842	12253.7	40.2056	0.0092	99.9532	101516177	876804	0.81385	589432	5.10787e+08		2010	183	0.0003	99.6904	99.6898	0.3572	2.778	9803.08	43.0884	0.0232	99.94	101519843	908210	0.815319	548292	4.8536e+08
1990	184	0.0003	99.0428	99.0428	1.5154	4.2293	3629.64	39.0871	0.058	99.8429	45635339	839898	0.662164	149569	8.57959e+07		2000	184	0.0005	98.9651	98.965	1.5799	4.3051	3772.06	46.6321	0.0631	99.8391	45457038	880321	0.658424	186983	1.07492e+08		2010	184	0.0005	98.615	98.6149	2.0577	5.0346	2236.93	59.9027	0.0823	99.803	45458044	886087	0.658779	166741	9.5087e+07
1990	185	0.0005	99.8566	99.8566	0.2122	2.0233	9764.41	32.0713	0.0113	99.9285	23953776	176449	0.81618	138196	5.96308e+07		2000	185	0.0005	99.7386	99.7386	0.3283	2.1483	8834.47	23.7657	0.0187	99.9196	24198678	163353	0.826027	181023	7.53617e+07		2010	185	0.0005	99.6705	99.6705	0.4372	2.2646	6625.95	19.8886	0.0227	99.9114	24267653	169768	0.832369	137836	5.65282e+07
1990	186	0.0176	93.607	37.2712	5.0437	11.171	758.454	52.3655	0.2848	99.5722	57872042	1.18115e+06	0.600249	156766	4.4891e+07		2000	186	0.0176	92.2289	37.0606	5.1511	11.3635	784.966	52.9255	0.3265	99.5619	57355986	1.23719e+06	0.592011	178848	5.041e+07		2010	186	0.0207	86.3711	35.9853	7.652	15.8164	569.483	41.5895	0.4674	99.3259	56034443	1.13716e+06	0.571074	176650	5.13508e+07
1990	187	0.0005	99.7286	99.7268	0.38	3	21166.4	46.7131	0.0199	99.9342	106419121	744310	0.808145	445750	5.17996e+08		2000	187	0.0002	99.7732	99.7725	0.3507	2.9359	21723.3	52.6167	0.0173	99.9365	105982042	729317	0.804022	543583	6.23182e+08		2010	187	0.0004	99.647	81.9547	0.4956	3.2287	12321	63.5694	0.0254	99.9273	106178015	764604	0.807635	552214	6.33112e+08
1990	188	0.0005	99.2905	99.2877	0.6623	2.9468	5695.09	35.009	0.0438	99.921	69937199	604673	0.768688	364559	1.17714e+08		2000	188	0.0007	99.1229	99.1199	0.7957	3.1915	4932.36	31.0218	0.052	99.9108	70111618	581907	0.77188	497274	1.57025e+08		2010	188	0.0009	98.8215	98.8151	0.929	3.4204	3836.31	31.633	0.0663	99.9012	70206563	635469	0.775733	383784	1.20794e+08
1990	189	0.0003	99.4775	99.4774	0.7115	3.6473	5860.15	64.8513	0.0362	99.9058	88790575	1.01367e+06	0.746858	284619	3.18327e+08		2000	189	0.0004	99.4409	99.4362	0.7453	3.7161	5496.74	66.48	0.0382	99.9036	88767898	1.07208e+06	0.748812	348134	3.83387e+08		2010	189	0.0056	98.8771	98.6155	1.3075	4.8884	3223.09	62.6108	0.0672	99.8633	88771914	1.07195e+06	0.750702	339827	3.76363e+08
1990	190	0.0019	96.7291	54.9773	2.4826	6.3617	1331.8	48.9046	0.1633	99.7695	57034736	1.0489e+06	0.665606	159034	4.56207e+07		2000	190	0.0033	96.3862	54.6598	2.7064	6.7491	1239.83	49.0598	0.179	99.7519	57123901	1.05604e+06	0.669855	187917	5.33253e+07		2010	190	0.0039	95.2239	53.629	3.1529	7.5136	1096.78	49.0959	0.2257	99.7171	57044069	1.04601e+06	0.668616	183550	5.19742e+07
1990	191	0.0005	99.7954	99.7954	0.3819	2.8091	3442.11	41.4872	0.0158	99.9105	47484823	399798	0.813491	212208	1.30727e+08		2000	191	0.0005	99.7868	99.7867	0.3927	2.8254	3474.58	40.8054	0.0164	99.9097	47719876	397232	0.820519	279505	1.64438e+08		2010	191	0.0005	99.7563	99.7552	0.4319	2.8694	3348.28	38.803	0.0183	99.9078	47728540	417485	0.820988	276511	1.65738e+08
1990	192	0.0006	99.7579	99.606	0.2899	2.865	15813.8	63.7288	0.0186	99.9238	70548078	345007	0.847369	325537	3.46681e+08		2000	192	0.0009	99.7035	99.551	0.3264	2.9276	14149.2	65.4382	0.0222	99.9212	70790582	340422	0.851405	394954	4.12516e+08		2010	192	0.0006	99.3684	99.2121	0.7828	3.7321	8961.33	63.3394	0.0427	99.8878	70860031	357520	0.853835	419070	4.4034e+08
1990	193	0.0028	96.633	58.0291	4.0749	8.5626	1055.41	54.2559	0.1698	99.6628	48361461	1.12467e+06	0.598644	123809	4.0538e+07		2000	193	0.004	96.3267	57.8422	4.2677	8.8756	1093.1	56.0231	0.1848	99.6478	48221953	1.14278e+06	0.60122	156066	4.94444e+07		2010	193	0.0049	95.4226	57.5239	5.0691	10.1774	879.877	57.8468	0.2233	99.5842	48179612	1.12606e+06	0.600872	143820	4.55936e+07
1990	194	0.0051	96.4353	50.1722	3.8862	7.6057	947.48	52.5279	0.1753	99.6725	40577274	1.10679e+06	0.542968	90378.7	2.88202e+06		2000	194	0.0067	96.2385	50.1007	4.0874	7.907	972.222	54.0864	0.1855	99.657	40583702	1.10764e+06	0.545832	104490	3.3687e+06		2010	194	0.0032	95.4237	49.6769	4.5904	8.6655	855.998	59.2974	0.2223	99.6205	40541745	1.09683e+06	0.544898	104947	3.32694e+06
1990	195	0.0002	99.2762	99.2762	1.1742	3.8639	2729.66	41.4096	0.0478	99.8751	59684355	464272	0.783338	269912	1.67433e+08		2000	195	0.0002	99.2433	99.2433	1.2048	3.9148	2698.28	42.4712	0.0497	99.8732	59802268	454778	0.787698	339035	2.04815e+08		2010	195	0.0002	99.1932	99.1932	1.2528	3.9852	2622.92	43.4111	0.0525	99.8704	59846117	497078	0.789528	345090	2.07279e+08
1990	196	0.0014	98.6545	98.6405	2.4281	5.9841	1747.5	33.0157	0.0789	99.7732	48086111	1.39895e+06	0.523051	117080	1.60794e+06		2000	196	0.0021	98.5317	98.4791	2.5906	6.2463	1805.04	36.6579	0.0859	99.7612	47892576	1.35191e+06	0.522329	108262	1.47852e+06		2010	196	0.0023	98.197	98.1359	2.9128	6.7717	1612.6	40.2984	0.1032	99.7365	47881352	1.343e+06	0.52231	122721	1.67515e+06
1990	197	0.0064	96.75	51.4747	3.3272	9.0402	1101.57	47.8226	0.1638	99.6928	69147911	1.76423e+06	0.563971	175114	4.02792e+06		2000	197	0.0069	96.4026	51.1619	3.4624	9.3044	1174.18	49.1285	0.18	99.682	69207346	1.66691e+06	0.562759	165317	3.64021e+06		2010	197	0.0082	95.3601	50.5143	3.8769	10.1102	1086.22	52.5401	0.2227	99.6521	69040410	1.65732e+06	0.561015	184544	4.13603e+06
1990	198	0.0029	96.6637	59.4329	2.6843	6.1659	1615.22	55.1875	0.1658	99.7285	36127828	666236	0.667859	82814.3	5.2233e+07		2000	198	0.0036	96.5235	59.4233	2.7853	6.305	1667.89	56.3695	0.1729	99.7218	36279060	678132	0.670361	97571.4	5.96921e+07		2010	198	0.0049	95.7348	59.2095	3.1118	6.7404	1414.28	57.8822	0.2079	99.6991	36259265	697648	0.669724	93264.1	5.63946e+07
1990	199	0.0018	99.6466	99.5545	0.7504	3.0177	7011.42	43.1811	0.0252	99.8524	21699872	205472	0.813893	51746.2	6.18605e+07		2000	199	0.0018	99.6395	99.5475	0.7629	3.0294	7011.43	45.0207	0.0257	99.8515	21838288	212992	0.811682	64257.8	7.36382e+07		2010	199	0.0018	99.5342	99.4417	0.9108	3.1673	4949.31	56.221	0.0327	99.8419	21879456	219420	0.815315	60487.7	6.99929e+07
1990	200	0.0009	99.5124	99.5094	0.7911	2.914	7375.28	42.6772	0.0349	99.9017	44930484	303582	0.848465	108869	1.20554e+08		2000	200	0.0009	99.5018	99.4987	0.8034	2.9305	8927.99	42.4295	0.0355	99.9008	44799218	305840	0.845861	134207	1.40657e+08		2010	200	0.0009	99.3161	99.3159	0.9808	3.1656	6058.4	43.9721	0.0465	99.8886	44831768	323279	0.847156	122163	1.31063e+08
1990	201	0.0005	99.8564	99.8564	0.2066	1.8287	12335.7	64.1775	0.0118	99.9457	27386993	183119	0.830327	132785	4.43066e+07		2000	201	0.0005	99.8564	99.8564	0.2066	1.8287	12335.7	64.1775	0.0118	99.9457	27253657	189195	0.824312	180186	5.96075e+07		2010	201	0.0005	99.7737	99.7737	0.332	1.9684	8737.77	62.8234	0.0174	99.9365	27307070	197169	0.82888	148896	4.89112e+07
1990	202	0.0004	99.6032	99.6032	0.7123	2.4724	3195.61	62.0265	0.0286	99.9068	28885337	278975	0.79002	117857	4.03764e+07		2000	202	0.0004	99.5979	99.5979	0.7221	2.4872	3151.19	62.2341	0.029	99.9059	28965533	274722	0.798598	172139	5.58939e+07		2010	202	0.0009	99.274	99.2483	0.977	2.7782	3066.13	59.5889	0.0474	99.8877	28968633	281866	0.799134	152869	5.02261e+07
1990	203	0.002	98.0888	78.2798	1.4819	5.3856	2769.57	46.3558	0.1066	99.8489	90954604	1.58901e+06	0.670734	261665	1.09958e+08		2000	203	0.0028	97.9612	78.2125	1.5628	5.5601	2831.58	47.4575	0.1132	99.8435	90823036	1.59241e+06	0.67088	267621	1.17201e+08		2010	203	0.0036	97.4349	77.824	1.9984	6.4842	2107.98	47.6098	0.1378	99.8132	90757573	1.71032e+06	0.6703	264999	1.11926e+08
1990	204	0.0004	99.6035	99.6035	0.6585	3.2285	5650.83	55.8598	0.0282	99.8698	34703141	222482	0.838304	154379	6.28417e+07		2000	204	0.0004	99.5914	99.5914	0.6624	3.2311	5650.84	56.2345	0.029	99.8696	34780244	224892	0.838927	224129	8.90242e+07		2010	204	0.0004	99.229	99.229	0.8763	3.4921	5311.88	53.2339	0.0492	99.8541	34806811	233055	0.840864	179750	7.1237e+07
1990	205	0.0036	97.6486	87.1269	3.3603	7.8774	907.881	43.8028	0.1288	99.6952	53921865	1.22364e+06	0.601184	182049	9.82767e+06		2000	205	0.004	97.2302	86.7149	3.8447	8.7036	835.188	44.3998	0.1472	99.6575	53904380	1.15587e+06	0.601341	157452	7.92258e+06		2010	205	0.006	96.4497	85.8688	4.2154	9.3273	807.879	45.1903	0.1788	99.6277	53753847	1.23339e+06	0.59883	182389	9.95928e+06
1990	206	0.0029	98.0542	94.6472	2.8184	7.4351	1001.18	49.0184	0.1115	99.7312	59174939	1.4337e+06	0.576357	159225	1.44953e+07		2000	206	0.0025	97.6725	94.2697	3.123	7.9838	1006.96	49.0817	0.1288	99.7075	58767600	1.50144e+06	0.572491	161941	1.51225e+07		2010	206	0.0053	96.4448	93.0858	3.8007	9.2009	862.641	47.3438	0.1778	99.6524	58661122	1.48129e+06	0.570842	171904	1.59159e+07
1990	207	0.0044	96.855	52.1841	2.1165	4.8008	1383.47	69.9378	0.1567	99.8039	37421032	994311	0.540612	82015.3	4.27809e+06		2000	207	0.005	96.5189	52.0008	2.2777	5.0339	1732.83	72.367	0.1731	99.7913	37443688	967119	0.54065	95768.5	5.15088e+06		2010	207	0.0044	94.8431	51.1045	3.0055	6.0901	1377.93	48.1765	0.2392	99.739	37351545	987047	0.53935	94922.1	4.9045e+06
1990	208	0.0004	99.3987	99.3987	0.925	3.3102	4362.48	33.6479	0.0407	99.867	36509475	210052	0.859098	161279	4.98789e+07		2000	208	0.0007	99.3819	99.3741	0.9476	3.3294	4228.29	34.6446	0.0417	99.8658	36538373	222253	0.857569	243413	7.31437e+07		2010	208	0.0011	98.1247	98.1173	1.6709	4.2629	3159.08	57.057	0.1032	99.8102	36507543	235226	0.856402	191970	5.82104e+07
1990	209	0.0005	98.4983	89.7503	2.1073	5.0685	1938.21	52.6351	0.0897	99.809	42996618	1.04011e+06	0.584355	110678	2.16767e+07		2000	209	0.0013	98.4519	89.7039	2.1474	5.1268	1948.16	53.3231	0.0923	99.8062	42797815	1.04338e+06	0.582468	140998	2.78613e+07		2010	209	0.0021	98.111	89.4354	2.4535	5.5797	1718.99	47.1579	0.1077	99.7785	42827326	1.04405e+06	0.583827	124956	2.40528e+07
1990	210	0.0006	99.8157	99.8084	0.2414	2.1716	7590.73	26.3518	0.0138	99.9391	44092268	313919	0.839718	133091	1.0407e+08		2000	210	0.0006	99.8091	99.8017	0.2452	2.177	7590.73	26.0689	0.0142	99.9388	44090318	307109	0.846607	181698	1.33723e+08		2010	210	0.0003	99.7479	99.7479	0.304	2.2446	6423.1	22.6712	0.018	99.9354	44135345	316474	0.848809	159636	1.19444e+08
1990	211	0.0003	99.7168	99.7168	0.5126	3.0159	11525.8	39.6746	0.0216	99.9023	48149221	503590	0.761133	127485	1.10193e+08		2000	211	0.0003	99.7116	99.7116	0.5229	3.0269	11525.9	40.4643	0.0219	99.9018	48354091	521359	0.763076	171152	1.41565e+08		2010	211	0.0008	99.6079	99.6073	0.6437	3.1745	6558.07	44.6482	0.0286	99.8949	48448811	552323	0.767113	147161	1.237e+08
1990	212	0.0015	98.4811	91.0485	2.4204	6.8796	1079.76	39.2339	0.089	99.7705	69346397	1.43937e+06	0.624518	184334	6.47058e+07		2000	212	0.0015	98.4092	90.9807	2.4915	7.0105	1146.33	39.8625	0.0926	99.7654	69657515	1.31685e+06	0.628321	166669	5.41364e+07		2010	212	0.002	98.2392	90.8006	2.7137	7.4128	1075.87	44.0968	0.1019	99.7502	69693457	1.31264e+06	0.629536	188696	5.9064e+07
1990	213	0.0051	97.5064	79.293	3.8291	9.1489	858.359	41.0954	0.1329	99.6662	58272968	1.6265e+06	0.524314	141785	3.22831e+06		2000	213	0.0064	97.2816	79.175	3.9823	9.4224	875.248	42.9482	0.1437	99.655	58320059	1.58672e+06	0.524619	125096	2.69601e+06		2010	213	0.0067	96.8325	78.9221	4.2185	9.8352	869.551	45.1865	0.1635	99.6388	58321468	1.65585e+06	0.525576	150301	3.35028e+06
1990	214	0.005	97.9594	97.91	2.932	6.3126	1060.65	71.336	0.1136	99.69	29456721	721017	0.589447	76965.5	3.32119e+07		2000	214	0.0046	97.7372	97.6938	3.0692	6.491	1125.21	73.7816	0.1238	99.6801	29405323	680021	0.580365	60267.5	2.51563e+07		2010	214	0.0046	96.4767	96.4362	4.1005	7.7863	731.073	58.3651	0.1871	99.6028	29240700	662622	0.57589	76863.7	2.96229e+07
1990	215	0.008	95.4456	61.3418	5.1949	9.667	591.917	74.6031	0.2165	99.5361	36986757	807176	0.608817	99434.1	5.45961e+07		2000	215	0.013	94.1991	60.4375	5.8612	10.6256	574.068	78.0386	0.2614	99.487	36516869	766291	0.595026	78444.7	4.27616e+07		2010	215	0.0148	91.6821	58.3029	7.1328	12.3844	523.091	60.9687	0.3545	99.3943	36139940	719697	0.586492	94837.1	4.97564e+07
1990	216	0.0008	99.7045	99.7031	0.5305	3.044	4907.83	40.1089	0.0222	99.9112	59286198	829489	0.718322	197328	1.58886e+08		2000	216	0.0006	99.632	99.631	0.6186	3.1945	4288.83	39.2687	0.0266	99.9045	59142505	820426	0.71444	188472	1.51075e+08		2010	216	0.0008	99.1196	99.117	1.2009	4.1832	2356.75	31.4663	0.0542	99.8608	59189671	898573	0.715964	185111	1.48237e+08
1990	217	0.0012	97.8814	54.528	2.6946	5.6967	1636.11	38.7321	0.1104	99.7506	37747235	814257	0.624158	97170.5	5.80031e+07		2000	217	0.0009	97.8902	54.5431	2.6815	5.6849	1695.1	39.6425	0.1098	99.7523	37931347	805671	0.629626	132104	7.91243e+07		2010	217	0.0459	95.9597	51.7327	5.3503	9.4736	1030.94	25.4423	0.1781	99.5402	37948670	838922	0.630742	112992	6.66668e+07
1990	218	0.001	98.9827	98.9733	1.3944	5.9699	3366.37	41.7159	0.0636	99.8597	135877113	1.812e+06	0.727889	374650	6.28733e+08		2000	218	0.0009	98.933	98.9064	1.3945	5.9582	3618.58	42.3492	0.0663	99.8602	135877274	1.83454e+06	0.727854	527659	8.81615e+08		2010	218	0.0013	98.6449	98.6124	1.5951	6.4148	3043.65	43.8842	0.0812	99.8467	135910317	1.89036e+06	0.728545	447640	7.46081e+08
1990	219	0.002	97.6337	97.6172	2.2495	6.6584	2423.53	43.0167	0.1202	99.7857	83495785	583997	0.787438	374060	9.29746e+07		2000	219	0.0023	97.5652	97.5476	2.3257	6.8114	2328.66	42.1851	0.1228	99.7797	83294196	583961	0.783182	537473	1.29509e+08		2010	219	0.0057	96.8917	96.7464	2.5979	7.3596	1988.92	40.9757	0.1475	99.7587	83233455	633447	0.78395	416269	1.00534e+08
1990	220	0.002	96.4553	80.2265	3.3326	5.7484	988.241	65.7408	0.1705	99.6712	21469484	564157	0.554444	49165.7	1.07287e+07		2000	220	0.0031	96.2492	80.1623	3.4704	5.8969	1086.52	67.9111	0.1804	99.661	21532341	532183	0.555979	58888.1	1.2206e+07		2010	220	0.0046	94.8583	79.6366	4.1651	6.6412	959.335	78.6183	0.2376	99.6158	21471637	536407	0.553987	56648.1	1.15736e+07
1990	221	0.0016	97.8789	97.8555	3.477	7.6641	1226.91	49.6874	0.1125	99.6649	42464761	929281	0.610518	110715	2.26386e+07		2000	221	0.0014	97.8489	97.8258	3.4798	7.6649	1314.23	49.2108	0.1138	99.6649	42251735	894695	0.602792	103412	2.01648e+07		2010	221	0.0014	97.7146	97.6965	3.7036	7.9869	1226.91	33.2376	0.1211	99.6486	42252308	913496	0.60291	108168	2.08713e+07
1990	222	0.0004	99.2607	99.2582	0.7585	3.855	9232.31	40.3943	0.0482	99.9112	121227459	795297	0.822678	427016	1.07582e+09		2000	222	0.0004	99.205	99.2025	0.8041	3.9636	8462.96	43.8653	0.0516	99.9082	121203887	756588	0.823913	359632	9.04506e+08		2010	222	0.0008	98.6723	59.8135	1.317	5.1813	3556.46	48.2598	0.0804	99.8706	121184058	816417	0.823993	371898	9.48417e+08
1990	223	0.0006	99.1105	99.0649	1.0964	4.3064	2188.31	61.9305	0.0561	99.8758	84954516	540651	0.849124	323857	9.16885e+07		2000	223	0.0008	99.0949	99.0472	1.1134	4.34	2173.57	61.6144	0.0569	99.8745	85313479	540651	0.853139	510159	1.36798e+08		2010	223	0.0011	98.7975	98.7452	1.3055	4.722	1986.3	58.9761	0.0714	99.8598	85246639	560874	0.852335	405533	1.10619e+08
1990	224	0.0017	99.7993	99.7904	0.2271	2.3085	12801	58.4992	0.0163	99.9428	60752112	596552	0.777364	177314	1.36707e+08		2000	224	0.0017	99.7774	99.7686	0.2369	2.3267	12800.9	59.6598	0.018	99.942	60530940	629175	0.771435	213665	1.60416e+08		2010	224	0.0019	99.042	99.0172	1.3244	4.1752	1814.73	22.5488	0.0586	99.8603	60530087	697575	0.771537	185838	1.43639e+08
1990	225	0.007	98.2168	89.9449	2.6144	7.8609	891.188	44.6998	0.1019	99.7605	82465475	2.09393e+06	0.56414	331116	2.24272e+07		2000	225	0.0077	98.028	89.7966	2.8541	8.3714	869.97	45.3168	0.111	99.7427	82532231	1.93925e+06	0.564665	272428	1.78697e+07		2010	225	0.0085	97.701	89.5565	3.1541	8.9946	846.791	46.3429	0.1259	99.722	82514124	2.0695e+06	0.564495	333165	2.23396e+07
1990	226	0.002	99.0561	99.0079	0.9911	4.1182	3366.7	57.6578	0.0629	99.8946	98081020	366258	0.845106	208338	1.0958e+09		2000	226	0.0022	99.0177	98.972	0.9685	4.0585	3580.22	58.099	0.0648	99.8968	97627297	364440	0.830433	150741	8.13525e+08		2010	226	0.0026	98.8081	98.7662	1.1601	4.4428	3177.32	61.4539	0.0766	99.8823	97540440	369114	0.830117	177152	9.3354e+08
1990	227	0.0017	99.5928	99.582	0.5668	2.8572	8290.34	67.9917	0.0292	99.915	57747984	219419	0.880158	134397	6.96405e+08		2000	227	0.0017	99.5839	99.5731	0.5775	2.8642	8130.97	69.0089	0.0298	99.9147	57181263	205179	0.868116	97234.9	5.18248e+08		2010	227	0.0021	99.246	99.214	0.9377	3.4214	4314.64	67.5319	0.0526	99.8896	57149651	206114	0.868471	116143	6.05252e+08
1990	228	0.0002	99.506	99.506	0.674	3.0145	5076.43	44.5308	0.0349	99.9094	55787090	672642	0.736285	167129	4.33389e+07		2000	228	0.0002	99.4879	99.4879	0.6895	3.0398	5076.43	44.6602	0.036	99.9083	55741727	707856	0.735848	242759	5.93582e+07		2010	228	0.0007	99.272	99.2717	0.9663	3.49	3284.81	43.9065	0.0486	99.888	55794520	765112	0.737922	199353	4.99229e+07
1990	229	0.0008	99.7224	99.7189	0.4729	2.6458	5737.53	51.5531	0.0216	99.9181	48110956	379460	0.82161	199953	5.47038e+08		2000	229	0.0011	99.6335	99.6299	0.6192	2.8657	4575.5	50.8987	0.0274	99.9072	48185189	343520	0.828035	160459	4.25646e+08		2010	229	0.0011	99.4083	99.4046	0.8953	3.28	4016.27	52.1968	0.041	99.8876	48192032	358782	0.829224	182535	4.85665e+08
1990	230	0.0018	97.5543	69.5354	2.4699	5.4363	1786.9	52.979	0.1257	99.7676	39596335	722277	0.640318	107597	5.16809e+07		2000	230	0.0024	97.4397	69.4877	2.5162	5.5009	2071.94	55.4168	0.1317	99.7646	39600062	661584	0.647162	100963	4.78837e+07		2010	230	0.0021	96.9909	69.3669	2.813	5.8886	1714.4	45.1317	0.1537	99.7517	39603630	685418	0.648027	101806	4.73071e+07
1990	231	0.0009	98.4461	98.4404	2.127	5.7514	3680.96	46.7194	0.0923	99.7804	53366792	555277	0.773165	139218	2.14005e+08		2000	231	0.0009	98.4453	98.4396	2.1294	5.751	3713.26	46.7324	0.0924	99.7804	52974371	555554	0.757773	137661	2.14846e+08		2010	231	0.0007	98.2736	98.2717	2.2881	5.9908	3281.48	49.5164	0.1009	99.7712	52992593	572527	0.758526	131759	2.02588e+08
1990	232	0.0003	98.8312	98.8311	1.7791	5.5695	2795.91	71.1908	0.0716	99.8441	90983100	1.53867e+06	0.687984	232700	2.39425e+08		2000	232	0.0001	98.7948	98.7948	1.7978	5.6084	2870.33	72.6812	0.0735	99.8433	90766524	1.46076e+06	0.684821	273188	2.72753e+08		2010	232	0.0008	98.6602	98.6575	1.9556	5.9402	2435.18	74.3564	0.0804	99.8324	90823347	1.5038e+06	0.685896	254578	2.52925e+08
1990	233	0.0004	99.7213	99.7189	0.2291	2.5251	29250.9	44.9036	0.0211	99.9368	68875300	526435	0.798286	245273	3.26095e+08		2000	233	0.0004	99.7199	99.7175	0.2302	2.5251	29251	45.1936	0.0212	99.9368	69004177	516506	0.800633	234761	3.00412e+08		2010	233	0.0004	99.4472	99.4447	0.6213	3.2292	4315.72	37.2893	0.0385	99.9076	69055203	576870	0.802191	216303	2.85171e+08
1990	234	0.0162	90.5888	56.3669	14.9777	30.1047	121.434	34.8398	0.3678	98.7412	61558927	1.47028e+06	0.545964	265394	2.4899e+07		2000	234	0.0375	87.5567	45.6732	16.6715	33.2632	127.726	33.3016	0.4385	98.5603	60109199	1.31549e+06	0.52391	196302	1.84925e+07		2010	234	0.0436	81.6282	37.3649	15.5078	31.065	145.29	35.6547	0.5476	98.5834	58878822	1.26183e+06	0.506871	248352	2.43787e+07
1990	235	0.009	97.8494	97.5578	2.9411	7.0905	1056.39	49.2693	0.1203	99.7412	64725926	414225	0.819656	316612	9.59309e+08		2000	235	0.0092	97.7279	97.4357	2.9656	7.1334	1072.57	49.3094	0.1258	99.7392	64919433	373765	0.823233	243990	7.24622e+08		2010	235	0.0102	97.4298	52.9626	3.1687	7.4878	1027.61	49.3513	0.1388	99.7233	64883606	380293	0.823421	285867	8.49652e+08
1990	236	0.0031	97.0394	63.5354	2.5721	5.9281	1110.07	57.9156	0.1591	99.7706	48444616	568594	0.747728	271461	3.93707e+08		2000	236	0.0037	96.8394	63.4559	2.6486	6.0484	1171.17	58.1183	0.1675	99.7656	48445455	446054	0.748008	216368	2.89645e+08		2010	236	0.0057	96.5423	63.5362	3.2209	6.9206	1029.5	55.0608	0.1792	99.7223	48422274	454479	0.749876	260462	3.53528e+08
1990	237	0.0068	96.9006	91.7482	2.8749	7.4223	1727.96	48.6806	0.1625	99.732	67770657	616171	0.758412	260369	4.79384e+07		2000	237	0.007	96.8354	91.6819	2.9508	7.5592	1619.64	48.9729	0.1655	99.7262	67633688	632234	0.757868	377100	6.81965e+07		2010	237	0.0079	96.4183	91.2613	3.1748	7.9609	1494.72	48.5681	0.1831	99.7096	67608006	681014	0.75775	299410	5.47249e+07
1990	238	0.0003	98.8426	98.8426	0.9162	3.3105	4742.87	33.3407	0.0704	99.8825	44915682	448767	0.728753	151388	1.98275e+08		2000	238	0.0003	98.5219	98.5219	1.1303	3.6284	4680.47	30.4106	0.0858	99.8658	44614539	465817	0.72202	124334	1.66e+08		2010	238	0.0022	97.3705	97.3043	2.1269	5.1115	2487.53	47.451	0.1417	99.7899	44641053	528535	0.723644	114067	1.56869e+08
1990	239	0.0062	94.568	94.4663	8.9181	26.3375	229.684	36.6272	0.2472	99.2769	134368965	3.04262e+06	0.587165	389781	2.24785e+08		2000	239	0.0083	93.7997	93.6286	9.3986	27.6349	243.043	34.3561	0.2694	99.236	133629590	2.83061e+06	0.582378	286993	1.64737e+08		2010	239	0.013	90.6689	90.0051	10.7871	31.3861	227.139	39.8819	0.3735	99.1058	132381300	2.68631e+06	0.574332	372085	2.04512e+08
1990	240	0.0006	99.3219	99.3169	0.9187	4.5532	3959.06	45.4776	0.046	99.8729	90278421	632044	0.749574	353925	1.4577e+08		2000	240	0.0006	99.3041	99.2991	0.932	4.5802	3872.52	45.4964	0.047	99.872	90400577	643906	0.752061	437512	1.69356e+08		2010	240	0.0013	98.9065	98.8978	1.2086	5.1487	3374.65	44.7734	0.0682	99.8515	90353620	710571	0.752498	373640	1.49193e+08
1990	241	0.0004	99.7577	99.7577	0.3131	2.3089	7213.05	44.7638	0.019	99.9184	29268035	310736	0.756869	94267.4	2.91549e+07		2000	241	0.0009	99.6037	99.601	0.4145	2.4307	6788.75	43.2508	0.0289	99.9106	29318797	322637	0.756556	130295	3.90561e+07		2010	241	0.0022	97.5471	97.5399	1.6445	3.9056	4355.06	30.0395	0.1261	99.8145	29317659	345243	0.757288	108318	3.30439e+07
1990	242	0.0005	99.3305	99.3293	1.1464	4.0206	5577.26	31.3208	0.0439	99.8833	74036866	836446	0.752724	171703	3.12089e+08		2000	242	0.0007	99.3139	99.3108	1.1674	4.059	5577.26	32.8415	0.045	99.8818	73825366	817210	0.75081	229921	4.12599e+08		2010	242	0.0012	99.278	99.2742	1.2423	4.1692	5014.97	36.3226	0.0473	99.8777	73884762	880638	0.752315	210525	3.75437e+08
1990	243	0.0003	99.9662	99.9662	0.0495	1.7043	32539.7	58.7259	0.0033	99.9632	42872351	200341	0.776836	136468	4.49024e+08		2000	243	0.0003	99.9662	99.9662	0.0495	1.7035	32539.7	58.7259	0.0033	99.9633	42932549	192603	0.780635	108674	3.58874e+08		2010	243	0.0003	99.9652	99.9652	0.0524	1.7044	29581.6	60.2993	0.0033	99.9633	42974337	199154	0.78255	111843	3.70687e+08
1990	244	0.0004	99.1795	99.1795	1.4009	3.3688	4043.79	24.0378	0.05	99.848	28970836	204276	0.765454	94111.8	4.79312e+08		2000	244	0.0004	99.1777	99.1777	1.3874	3.3523	4118.68	21.9762	0.0501	99.8491	28647210	202333	0.764046	78241.3	4.08503e+08		2010	244	0.0004	98.7014	98.7014	1.6452	3.6564	5054.72	42.1094	0.0755	99.8288	28652728	223672	0.764267	71956.1	3.89069e+08
1990	245	0.0002	99.5688	99.5688	0.1724	2.7105	24881.3	63.0796	0.0301	99.9302	71568468	425390	0.788086	219571	1.43642e+08		2000	245	0.0002	99.406	99.406	0.2316	2.8184	19549.6	62.8084	0.0396	99.9257	71669737	417081	0.790716	204718	1.31653e+08		2010	245	0.0002	99.2108	99.2108	0.4417	3.1896	8170.12	54.5335	0.0513	99.9106	71649106	482851	0.790706	184215	1.22e+08
1990	246	0.0005	99.6795	99.678	0.4529	2.8149	6335.93	54.4685	0.0234	99.9141	51288533	553061	0.743536	161170	8.23959e+07		2000	246	0.0007	99.6201	99.6148	0.4872	2.8698	6052.3	52.6983	0.0269	99.9114	51341915	525187	0.751672	212412	1.03339e+08		2010	246	0.0017	98.9961	98.958	0.9924	3.6511	3620.66	53.9074	0.0615	99.874	51327035	581376	0.751595	177695	8.89411e+07
1990	247	0.0078	92.3319	92.2725	14.8438	23.8954	142.234	34.3048	0.2994	98.7836	42415799	721205	0.639681	231672	1.44922e+08		2000	247	0.0094	91.844	91.7499	15.2092	24.4425	143.136	33.8152	0.312	98.7486	42328962	637585	0.641353	171766	1.03033e+08		2010	247	0.0119	90.6503	90.4151	15.6295	25.0571	147.825	34.1901	0.342	98.7007	42255175	621040	0.639973	216584	1.3084e+08
1990	248	0.0085	95.5917	90.3933	7.3663	15.9048	242.851	25.7364	0.2068	99.4081	76577794	381725	0.810033	260498	1.16529e+09		2000	248	0.0097	95.3054	90.2778	7.4964	16.149	252.16	25.6422	0.2164	99.3979	76228419	355004	0.80161	180599	8.25964e+08		2010	248	0.0149	92.937	88.4418	8.9853	18.9955	249.9	43.6093	0.3054	99.2711	75829810	317790	0.797414	230009	1.03875e+09
1990	249	0.0005	99.0246	99.0206	0.7476	2.7232	6918.41	52.6771	0.0618	99.9187	54842609	166696	0.863294	236067	7.92788e+08		2000	249	0.0005	98.9803	98.9763	0.7479	2.7237	7867.99	52.4372	0.0645	99.9188	55108541	165596	0.87093	186756	6.26417e+08		2010	249	0.0005	99.0593	99.0553	0.7079	2.6585	7867.95	59.8315	0.0616	99.9223	55155234	174891	0.871952	207516	6.98167e+08
1990	250	0.0012	98.2299	98.2108	2.0283	4.0478	2858.24	46.2924	0.101	99.82	30151198	330174	0.696948	59847.6	1.12067e+08		2000	250	0.0028	98.0238	97.932	2.0372	4.0535	2925.5	47.2865	0.1102	99.821	30044211	325694	0.696698	52585.2	1.00578e+08		2010	250	0.0056	97.4044	97.3625	2.2731	4.3218	2260.64	50.247	0.1363	99.8098	30049636	340640	0.696997	50758.8	9.65684e+07
1990	251	0.0033	98.0896	98.0128	1.8807	5.2215	2445.8	55.8136	0.1146	99.8158	57652983	474381	0.759754	86623.4	2.83035e+08		2000	251	0.003	97.6544	97.5995	1.8647	5.1896	3896.72	58.6198	0.135	99.8184	57480023	460668	0.763525	68367.2	2.27292e+08		2010	251	0.002	97.3711	86.6565	2.1815	5.7167	3284.4	57.943	0.148	99.7948	57498382	471202	0.765312	73206.5	2.41306e+08
1990	252	0.0007	99.6486	99.6293	0.3135	3.0658	12522.4	49.7519	0.0263	99.9075	58567327	296350	0.786673	176182	3.97397e+08		2000	252	0.0007	99.6239	99.6046	0.3276	3.087	12522.4	49.2142	0.0278	99.9066	59213236	278225	0.788752	157613	3.42364e+08		2010	252	0.0009	99.4809	99.4629	0.5168	3.4025	5779.56	59.2011	0.0375	99.8926	59232084	317219	0.789393	142843	3.23892e+08
1990	253	0.0007	99.7533	99.7521	0.3528	2.1861	5764.85	47.8981	0.0194	99.9467	55363222	279523	0.813329	204693	4.44264e+08		2000	253	0.0007	99.7521	99.7509	0.3552	2.1896	5685.88	47.8497	0.0194	99.9465	55422233	296753	0.809665	158465	3.42562e+08		2010	253	0.0007	99.6688	99.6676	0.4441	2.3303	5534.28	46.1512	0.0249	99.9399	55469724	302403	0.811228	170764	3.75482e+08
1990	254	0.003	97.6784	97.6188	1.4065	4.0943	6104.58	55.2473	0.1303	99.855	54608793	198573	0.849572	219016	3.67925e+08		2000	254	0.003	97.6785	97.619	1.4062	4.0938	6013.46	55.2526	0.1303	99.855	54432558	195248	0.85179	172079	2.8945e+08		2010	254	0.0037	97.082	50.9509	1.7663	4.6642	4069.71	63.1638	0.1607	99.8288	54356115	195265	0.852501	185535	3.11471e+08
1990	255	0.0028	98.5463	98.4943	1.1964	3.9844	2576.48	62.2149	0.0875	99.8778	67978647	237204	0.823417	248585	9.86425e+08		2000	255	0.003	98.5053	98.4517	1.1866	3.9495	2883.93	62.3783	0.0898	99.8795	67926820	198966	0.821397	181803	7.18861e+08		2010	255	0.0033	98.3814	98.327	1.2979	4.1303	2629.95	62.5785	0.0967	99.8724	67914642	211032	0.821792	213441	8.43022e+08
1990	256	0.0006	99.2282	99.2272	0.8979	3.5983	4126.17	55.7053	0.053	99.886	62016207	375545	0.774623	203123	6.80708e+08		2000	256	0.0008	99.2003	99.1993	0.9136	3.6253	3987.48	55.5038	0.0547	99.8847	62079536	369478	0.773367	170004	5.74635e+08		2010	256	0.0017	98.9309	98.9305	1.2402	4.1735	2791.28	55.0457	0.0703	99.861	62110127	389883	0.77428	159394	5.49422e+08
1990	257	0.0003	99.6286	99.6286	0.7068	3.0031	2693.2	37.9774	0.0273	99.8995	48240151	284314	0.810421	160485	5.38693e+08		2000	257	0.0006	99.586	99.5836	0.7458	3.0617	2596.33	36.6384	0.0299	99.8965	48106285	284076	0.806629	137922	4.6386e+08		2010	257	0.0014	99.5548	99.5419	0.796	3.1323	2455.06	35.4892	0.0317	99.8931	48113043	308127	0.806894	124763	4.34033e+08
1990	258	0.0008	98.4858	98.4713	1.3817	4.8727	3557.4	61.7311	0.0931	99.839	67901613	322421	0.801843	214384	5.78566e+08		2000	258	0.0008	98.4248	98.4102	1.42	4.9408	3485.29	62.0959	0.0965	99.836	67940915	318358	0.792979	177807	4.78112e+08		2010	258	0.0019	98.1479	98.1201	1.7985	5.6188	2167.33	61.9182	0.1117	99.8073	67962168	350275	0.792978	158841	4.46192e+08
1990	259	0.0055	86.7251	86.684	3.6872	8.2794	4954.16	8.5317	0.3998	99.6666	63597131	37299.1	0.794428	209364	8.84769e+08		2000	259	0.0055	86.7293	86.6882	3.6824	8.2699	5003.21	8.5568	0.3997	99.6671	64731056	37331.1	0.80537	186682	7.78206e+08		2010	259	0.0051	86.9171	86.8761	3.618	8.1539	5209.54	8.8444	0.3963	99.6735	64741813	37862.7	0.805698	175777	7.51365e+08
1990	260	0.0008	99.8545	99.8545	0.2383	1.8627	6476.73	6.1696	0.011	99.9283	17591751	15849.8	0.856539	50918.2	3.27941e+08		2000	260	0.0008	99.8133	99.8133	0.2867	1.9046	7196.38	N/A	0.0136	99.9246	17610312	14507.8	0.855716	35487.6	2.37977e+08		2010	260	0.0008	99.6625	99.6625	0.4308	2.0325	5631.89	48.2214	0.0234	99.9142	17625068	14087.7	0.857578	44123.4	2.888e+08
1990	261	0.0004	99.6754	99.6741	0.3619	2.2274	4803.84	39.8278	0.0228	99.9463	63474794	24903.4	0.868143	167760	1.10368e+09		2000	261	0.0004	99.6752	99.6739	0.3619	2.2238	4803.85	39.8824	0.0228	99.9465	63306004	28432.2	0.863928	121815	8.05297e+08		2010	261	0.0004	99.4789	99.4776	1.1331	3.528	3719.12	23.7992	0.0341	99.8889	63267291	27123.6	0.861956	150468	9.95396e+08
1990	262	0.0067	84.2915	84.0218	4.1337	9.5135	3186.98	58.239	0.5424	99.6751	71250170	73228.1	0.807644	206625	1.05736e+09		2000	262	0.0067	84.2759	84.0062	4.1378	9.5213	3186.98	58.3847	0.5434	99.6746	71137100	76914.2	0.809213	173675	8.93439e+08		2010	262	0.0063	83.9791	83.7626	4.076	9.4043	3260.25	59.381	0.5521	99.6774	71151902	77120.2	0.809633	171993	8.99093e+08
1990	263	0.0033	91.6363	91.4745	4.6039	12.3057	992.932	57.9365	0.368	99.5859	94503426	468097	0.762322	306056	3.99417e+08		2000	263	0.0063	90.6638	90.3674	4.6407	12.3813	976.106	58.5695	0.3988	99.5797	94045965	456493	0.759091	246398	3.19527e+08		2010	263	0.0079	89.1198	88.4803	5.1457	13.4612	989	55.5076	0.4427	99.5331	93537978	436014	0.75349	205059	2.89904e+08
1990	264	0.0005	99.8886	99.8886	0.1968	1.8626	6499.91	61.8248	0.0095	99.9415	26708158	32272.5	0.869727	70256.5	4.27061e+08		2000	264	0.0005	99.8886	99.8886	0.1968	1.8626	6499.91	61.8248	0.0095	99.9415	26733334	31872	0.868139	49767.2	3.11247e+08		2010	264	0.001	99.5799	99.5769	1.1549	2.9183	5735.38	29.8675	0.0288	99.8695	26739937	28892.9	0.8679	62540.6	3.83694e+08
1990	265	0.0002	99.878	99.878	0.13	2.0843	19010.9	58.2971	0.0101	99.9571	77147659	42643.8	0.837444	192886	5.34453e+08		2000	265	0.0002	99.8724	99.8724	0.1356	2.0916	19011	59.8312	0.0106	99.9568	77209183	49563.9	0.837071	141000	3.91276e+08		2010	265	0.0005	99.2409	99.2378	1.6378	4.9178	3415.14	45.9409	0.0524	99.8451	77089836	42190	0.834343	168872	4.68099e+08
1990	266	0.0002	99.3075	99.3066	0.9511	4.146	3086.71	52.473	0.0481	99.8968	113646060	469243	0.850761	318369	5.47359e+08		2000	266	0.0001	99.2961	99.2961	0.9458	4.1321	3168.87	52.7897	0.0488	99.8973	113694976	448900	0.849772	278445	4.72772e+08		2010	266	0.0001	99.1425	99.1425	1.1085	4.4995	2806.1	53.0219	0.0578	99.8849	113695746	508174	0.849687	238640	4.28671e+08
1990	267	0.0009	99.1598	99.1523	0.7586	3.1302	3616.47	51.7924	0.057	99.9076	62127351	228277	0.85187	200073	3.22805e+08		2000	267	0.0011	99.1518	99.1436	0.7594	3.1316	3674.8	50.3523	0.0574	99.9076	61900536	247185	0.845543	165196	2.6655e+08		2010	267	0.0033	98.5937	98.5447	1.2856	4.0174	2958.94	54.2535	0.0889	99.867	61937425	254035	0.846904	139688	2.40299e+08
1990	268	0.0058	91.4544	91.3631	2.7042	5.8792	2429.99	11.8655	0.299	99.7817	57594658	20708.3	0.857585	144373	9.20773e+08		2000	268	0.0058	91.4499	91.3586	2.71	5.8887	2416.41	11.8457	0.2991	99.7812	57660877	19138.7	0.857003	115699	7.53211e+08		2010	268	0.0062	93.1782	93.0868	2.5054	5.5511	2350.76	13.2477	0.256	99.802	57660877	19447.7	0.857003	115633	7.67386e+08
1990	269	0.0005	99.4543	99.4543	0.3829	2.0139	5442.7	27.0889	0.0347	99.9326	28383912	22515.7	0.863472	65452.8	2.85787e+08		2000	269	0.0005	99.4541	99.4541	0.3829	2.0125	5442.7	27.0889	0.0347	99.9327	28288333	27020.8	0.856639	51690.2	2.22883e+08		2010	269	0.001	99.0347	99.033	1.651	3.4485	4700.54	8.6557	0.0554	99.8378	28288612	25183.7	0.856294	61395.1	2.66692e+08
1990	270	0.0003	99.6508	99.6508	0.3517	2.2822	13917	39.0912	0.025	99.9323	43486583	14111	0.842844	103215	2.64304e+08		2000	270	0.0003	99.651	99.651	0.3516	2.2819	13917	39.0792	0.025	99.9323	43429477	21579.3	0.837332	78359.5	1.99282e+08		2010	270	0.0009	98.7952	98.7942	2.6082	5.4687	3951.7	39.008	0.0762	99.762	43290853	20684	0.830879	93050.6	2.38527e+08
1990	271	0.0007	99.3779	99.2879	0.7296	3.6409	3764.08	55.5101	0.0443	99.8925	70442991	217738	0.842148	222453	1.30785e+08		2000	271	0.0007	99.3811	99.2911	0.7248	3.6321	3790.4	55.4318	0.0441	99.8929	72726035	219752	0.82576	200720	1.0674e+08		2010	271	0.0011	99.0155	98.922	1.0763	4.2773	3245.7	56.5048	0.0655	99.8663	72774488	236142	0.827131	186124	1.01802e+08
1990	272	0.0007	96.4032	96.3931	2.0424	5.7646	1615.63	61.6998	0.1784	99.8059	74247950	387185	0.821972	273849	1.61174e+08		2000	272	0.0013	96.1962	96.1817	2.1367	5.9371	1588.09	62.1656	0.1871	99.7992	73931104	361527	0.818382	228067	1.36505e+08		2010	272	0.0014	94.9533	94.9312	2.9774	7.503	1411.64	51.6151	0.2348	99.7294	73832997	358002	0.816927	170927	1.11535e+08
1990	273	0.0015	99.2704	99.2584	0.6985	3.1467	3648.27	46.163	0.0481	99.9145	71392204	65985.5	0.836311	180311	8.00172e+08		2000	273	0.0015	99.3221	99.3101	0.6579	3.0731	3699.66	47.5109	0.0453	99.9176	71454995	61643.4	0.837394	145517	6.46776e+08		2010	273	0.0015	99.3168	99.3048	0.6732	3.1005	3648.29	48.8082	0.0458	99.9165	71450856	60681.6	0.837348	155664	6.97996e+08
1990	274	0.0016	94.6221	94.5789	1.6941	5.7232	4418.91	27.6083	0.2165	99.8482	108776994	74487.9	0.822615	205626	9.74019e+08		2000	274	0.0016	94.6202	94.5771	1.6944	5.7235	4418.91	27.6393	0.2167	99.8482	109150803	60091	0.825171	198172	9.17105e+08		2010	274	0.0016	95.0677	95.0253	1.5961	5.4992	4418.89	29.1403	0.2036	99.8566	109154802	61738.6	0.825258	181202	8.68858e+08
1990	275	0.0006	98.4935	98.4923	1.8928	5.732	1799.01	42.9798	0.0886	99.7974	67670617	357161	0.821876	134080	1.41975e+08		2000	275	0.0006	98.4256	98.4249	1.9326	5.7958	1831.86	42.1158	0.0919	99.7946	67579561	324105	0.822893	132809	1.34275e+08		2010	275	0.0012	98.0121	98.0046	2.2204	6.3035	1619.13	42.6665	0.1122	99.7725	67579917	344633	0.822936	100189	1.12347e+08
1990	276	0.0006	96.5051	96.5039	3.2623	6.9361	830.814	42.3692	0.1774	99.6757	41099829	286944	0.767141	168476	5.98381e+07		2000	276	0.0006	96.3996	96.3984	3.3099	7.0162	824.341	42.0098	0.1816	99.6709	41049900	299117	0.766558	143534	5.09304e+07		2010	276	0.0003	96.0941	96.0941	3.5435	7.3289	778.134	43.3421	0.1939	99.6548	41070229	316623	0.768199	118982	4.22525e+07
1990	277	0.0004	99.2705	99.2705	0.9475	2.8119	2362.26	62.7338	0.0482	99.8925	34672594	182228	0.80312	69032.9	5.57307e+07		2000	277	0.0004	99.2324	99.2324	0.9743	2.8448	2383.94	61.6835	0.0503	99.8905	34823003	176833	0.803398	64286.2	5.09077e+07		2010	277	0.0004	99.2061	99.2061	1.0274	2.906	2240.09	61.1141	0.0517	99.8869	34822150	187619	0.803578	48727.8	4.2214e+07
1990	278	0.0012	99.6408	99.6079	0.2748	2.6296	14671.7	38.6313	0.0254	99.946	100187058	60407.7	0.837335	138052	8.40869e+08		2000	278	0.0012	99.6409	99.608	0.2748	2.6288	14671.7	38.6313	0.0254	99.9461	100089491	61870.7	0.836261	95520.8	5.97918e+08		2010	278	0.0024	99.5808	99.516	0.376	2.8411	8030.83	50.6846	0.03	99.939	100067301	62611.1	0.835749	115360	7.01698e+08
1990	279	0.0013	98.7508	98.7257	1.0804	3.9291	6560.54	76.2248	0.0755	99.8981	99496433	279595	0.901192	240060	5.14653e+08		2000	279	0.001	98.6705	98.6501	1.0662	3.897	7156.96	76.2055	0.0794	99.8993	99527106	246472	0.901883	235124	5.05472e+08		2010	279	0.0014	98.3853	98.3666	1.2366	4.2542	5623.33	51.0812	0.0935	99.8875	99463970	265615	0.901147	165893	3.89398e+08
1990	280	0.0004	99.2182	99.2132	1.3934	4.8337	2715.19	50.9305	0.0526	99.8601	92363401	406509	0.873359	297463	8.40469e+08		2000	280	0.0073	98.3362	58.2973	1.8272	5.7186	2189.96	47.4421	0.0953	99.8265	91931527	359198	0.879555	276712	7.80695e+08		2010	280	0.0016	98.0929	58.2047	1.9399	5.9455	2256.55	44.3885	0.1061	99.8182	91928816	390905	0.879984	221504	6.70182e+08
1990	281	0.0007	97.8546	97.8493	2.9117	5.8053	703.917	41.3609	0.1192	99.7244	37545149	262111	0.77978	81493.2	3.768e+07		2000	281	0.0018	97.5208	97.4784	3.0876	6.0392	705.663	40.8796	0.1334	99.7101	37541082	245166	0.785125	81026.3	3.71415e+07		2010	281	0.0039	96.8298	96.7566	3.4842	6.563	690.255	41.5312	0.1608	99.6792	37500593	261161	0.78396	60078.7	2.97941e+07
1990	282	0.0014	99.7418	99.7398	0.2251	2.4732	9782.41	39.7245	0.0191	99.9345	58504215	10888.2	0.87523	108735	3.39683e+08		2000	282	0.0014	99.7418	99.7398	0.2249	2.4692	9782.44	39.7036	0.0191	99.9347	58479024	10558.8	0.876074	116022	3.56626e+08		2010	282	0.0014	99.7274	99.7253	0.2445	2.4912	9144.47	44.2035	0.0203	99.9337	58476218	10220.1	0.876074	116290	3.65456e+08
1990	283	0.001	99.652	99.6446	0.4649	2.7264	6410.22	53.2452	0.026	99.9056	40995316	19421.3	0.843978	88276	2.8125e+08		2000	283	0.001	99.6519	99.6445	0.4647	2.7234	6410.23	53.226	0.026	99.9058	41061029	18937.8	0.840819	79833.2	2.48995e+08		2010	283	0.0017	99.4441	99.4364	0.7957	3.1695	4564.94	59.3288	0.0398	99.8816	41045417	19320.5	0.840534	88299.3	2.80053e+08
1990	284	0.0006	99.8775	99.8775	0.1683	2.0522	9006.71	61.2602	0.0102	99.9235	23601061	2832.32	0.851553	40955.9	1.76397e+08		2000	284	0.0006	99.8774	99.8774	0.1686	2.0504	9006.73	61.2293	0.0102	99.9236	23630123	3034.42	0.850193	44558.4	1.87288e+08		2010	284	0.0006	99.868	99.868	0.1802	2.0584	8556.5	60.1498	0.0108	99.9231	23643546	2464.04	0.85144	41486.3	1.80824e+08
1990	285	0.0006	99.9292	99.9292	0.0972	1.9452	17912.3	60.6912	0.0063	99.9501	44148576	1380.91	0.825838	73315.5	2.25006e+08		2000	285	0.0006	99.9284	99.9284	0.0965	1.9441	17912.3	60.8156	0.0064	99.9502	43944741	1383.29	0.822597	81609.2	2.47575e+08		2010	285	0.0006	99.9242	99.9241	0.1035	1.9546	16969.5	60.0051	0.0067	99.9496	43950786	1104.03	0.822892	70098.4	2.22418e+08
1990	286	0.0012	99.4389	99.4275	0.9419	3.8831	4502.71	61.4394	0.0384	99.8786	69946253	290720	0.845446	238132	1.09882e+09		2000	286	0.0004	99.4002	99.3909	0.9497	3.8952	4502.71	61.4384	0.0407	99.8781	70254263	269401	0.849753	205345	9.466e+08		2010	286	0.0004	99.3053	99.296	0.9796	3.9456	4502.74	60.3178	0.0457	99.876	70237834	287976	0.850216	187287	8.92573e+08
1990	287	0.0006	98.8411	98.8385	1.6584	4.5062	2100.46	67.4229	0.0708	99.814	43774193	235993	0.84629	147403	5.761e+08		2000	287	0.0006	98.8124	98.8098	1.6859	4.5432	2086.91	67.5435	0.0723	99.812	43813888	227120	0.845864	131162	5.07537e+08		2010	287	0.0006	98.4974	98.4947	1.8945	4.8281	1902.8	67.113	0.0884	99.7961	43831077	246300	0.846965	116195	4.67171e+08
1990	288	0.001	94.6795	94.588	2.8032	7.2698	8422.33	23.5681	0.218	99.75	80822647	22342.2	0.795164	127232	2.10625e+08		2000	288	0.001	94.6795	94.588	2.803	7.2694	8422.33	23.5654	0.218	99.75	80692715	19818.9	0.795348	150642	2.42481e+08		2010	288	0.0008	95.7879	95.766	2.4409	6.555	7782.77	27.4823	0.1851	99.78	80692715	20403.7	0.795348	133213	2.21141e+08
1990	289	0.0007	98.5777	98.5772	1.6222	4.4814	1578.6	63.6063	0.0843	99.8343	55344998	271355	0.853738	135352	1.86171e+08		2000	289	0.0012	98.4743	98.4686	1.6818	4.5759	1560.24	63.2625	0.0893	99.8301	55361384	265735	0.852161	143350	1.92384e+08		2010	289	0.0017	98.2403	98.2374	1.7987	4.7595	1554.21	62.9648	0.1	99.8217	55323253	276704	0.850648	103036	1.49111e+08
1990	290	0.0006	98.6492	76.9544	1.587	4.5095	2375.95	40.808	0.0815	99.854	71620151	370983	0.815608	174580	3.80595e+08		2000	290	0.0006	98.6133	76.9186	1.6074	4.5467	2365.29	40.7796	0.0833	99.8524	71815673	340142	0.819235	185429	3.95149e+08		2010	290	0.0004	98.6575	98.6574	1.5382	4.4208	2283.37	41.362	0.0816	99.8575	71810966	341670	0.819057	129065	2.98701e+08
1990	291	0.0033	97.6936	97.6768	1.3359	4.458	4405.33	52.1912	0.1244	99.846	56126891	35359.7	0.78341	95422.3	8.02269e+07		2000	291	0.0033	97.6902	97.6734	1.3387	4.4603	4405.34	52.2692	0.1246	99.8459	56168135	34116.9	0.785425	100539	8.39655e+07		2010	291	0.003	97.4864	97.4506	1.6061	4.8799	3715.84	52.4923	0.1351	99.8264	56124678	33725.2	0.78493	104670	8.9018e+07
1990	292	0.0032	95.9311	95.9174	2.0012	4.2535	8861.66	2.2299	0.1705	99.8049	33079863	6685.86	0.833723	63121.6	1.09015e+08		2000	292	0.0032	95.931	95.9173	2.0012	4.2478	8861.72	2.2299	0.1705	99.8053	33115590	3584.21	0.83344	69735.2	1.18236e+08		2010	292	0.0028	96.1891	96.1762	1.8368	4.0373	13785	2.3989	0.1623	99.8167	33114257	3817.09	0.833344	70546.1	1.21935e+08
1990	293	0.0014	97.8365	97.8315	2.6039	5.7672	1026.46	52.556	0.1256	99.7605	47249841	285925	0.811343	157057	5.7528e+08		2000	293	0.0014	97.3659	97.3609	2.7319	5.9582	1032.41	52.3731	0.1458	99.7493	47119679	287713	0.810638	129044	4.69567e+08		2010	293	0.0017	97.0544	97.0485	3.076	6.469	942.272	54.4435	0.1619	99.7259	47136672	294485	0.811182	128760	4.83059e+08
1990	294	0.001	99.2939	99.2884	0.416	2.4819	12689.3	53.6896	0.0439	99.9102	27030749	16796.9	0.793099	43374.5	4.82008e+07		2000	294	0.001	99.2308	99.2254	0.4298	2.4975	12689.3	52.8893	0.047	99.909	27181657	15353.6	0.792033	49453.9	5.39774e+07		2010	294	0.001	99.2297	99.2242	0.4318	2.4973	12689.2	52.9368	0.0471	99.909	27195173	14556.1	0.792975	47497.6	5.33115e+07
1990	295	0.0038	93.6488	87.0122	4.2104	7.2955	976.764	41.5923	0.2896	99.6175	33971307	221680	0.780683	84215.8	1.89562e+08		2000	295	0.0038	93.5673	86.9475	4.2302	7.3207	980.45	41.4834	0.2925	99.6156	34058017	207969	0.780018	88190.5	1.98192e+08		2010	295	0.0031	93.8069	87.2685	4.1343	7.1962	1031.03	40.3932	0.2848	99.624	33973953	218382	0.777853	63931.4	1.54849e+08
1990	296	0.0016	97.4285	52.9413	1.5533	4.0214	17703.2	49.1352	0.1355	99.8491	44709471	82176.9	0.893921	124659	5.96552e+08		2000	296	0.0016	97.4285	52.9413	1.5533	4.0214	17703.2	49.1352	0.1355	99.8491	44610057	81813	0.891056	123053	5.85776e+08		2010	296	0.0013	97.6584	52.9328	1.5222	3.9757	18744.6	33.6438	0.127	99.8512	44610057	87047.7	0.891055	93596.5	4.77615e+08
1990	297	0.0009	97.089	85.7702	1.0512	3.3008	5583.84	58.0898	0.141	99.8758	45142874	188578	0.858562	115137	2.94958e+08		2000	297	0.0009	97.0771	85.7582	1.0572	3.3094	5583.84	58.5073	0.1418	99.8753	44980564	179378	0.858251	116621	2.98969e+08		2010	297	0.0015	96.9635	85.6488	1.1956	3.5085	4334.81	62.4765	0.1478	99.8648	44977045	196368	0.858249	80489.2	2.24484e+08
1990	298	0.0004	99.7924	99.7924	0.3936	2.9353	13727.7	48.2304	0.0171	99.8888	38426619	106623	0.883051	131267	4.62655e+08		2000	298	0.0004	99.7924	99.7924	0.3934	2.935	13727.7	48.2209	0.0171	99.8888	38508473	87904.7	0.890719	116929	4.02002e+08		2010	298	0.0004	99.7721	99.7721	0.4017	2.935	17159.8	48.5659	0.0185	99.8888	38510519	91389	0.890806	104824	3.77643e+08
1990	299	0.0033	95.4143	95.4052	1.9247	5.7697	5622.49	40.3438	0.2071	99.825	78559588	42007.6	0.869059	238424	9.81892e+08		2000	299	0.0033	95.4143	95.4052	1.9247	5.7663	5622.5	40.3438	0.2071	99.8251	78463636	42901.2	0.867501	229284	9.36827e+08		2010	299	0.0028	95.6911	95.6766	1.8047	5.526	6993.86	41.1448	0.1977	99.8326	78475819	44100.3	0.86779	200089	8.48836e+08
1990	300	0.0026	88.3446	88.3283	3.4384	5.4215	5190.97	48.732	0.4424	99.7033	25312015	38096.2	0.839666	65765.2	3.35931e+08		2000	300	0.0026	88.3445	88.3281	3.4391	5.4223	5190.97	48.7306	0.4424	99.7033	25320450	36887	0.841445	66067.9	3.38716e+08		2010	300	0.0026	88.3422	88.3259	3.4466	5.4288	5335.23	48.7109	0.4424	99.7028	25320450	38042	0.841445	52388.4	2.83572e+08
1990	301	0.0021	95.1303	93.1339	1.2097	3.2387	11651.2	3.3528	0.1949	99.8389	19420619	20435.3	0.886967	54059.3	1.80895e+08		2000	301	0.0021	95.1303	93.1339	1.2097	3.2387	11651.2	3.3528	0.1949	99.8389	19333615	16282.2	0.887453	55820.1	1.81846e+08		2010	301	0.0014	98.4001	98.3987	0.3356	2.4204	19973.5	45.6452	0.086	99.8924	19333615	16421.1	0.887453	45979.3	1.58042e+08
1990	302	0.0005	99.9472	99.9472	0.0829	1.8158	21307.4	45.5486	0.0048	99.944	27304413	53633.2	0.928887	87606.9	3.09029e+08		2000	302	0.0005	99.9472	99.9472	0.0829	1.8099	21307.5	45.5486	0.0048	99.9444	27287143	57229.2	0.916585	81532.2	2.901e+08		2010	302	0.0005	99.9467	99.9467	0.0848	1.8058	21307.8	46.8224	0.0048	99.9447	27285810	60315.9	0.916462	69371.6	2.59381e+08
1990	303	0.0002	98.8008	98.8	0.9246	4.0038	2556.7	44.5478	0.0748	99.9013	116299486	439844	0.862032	345327	4.53556e+08		2000	303	0.0002	98.7757	98.7749	0.944	4.0472	2488.82	44.6412	0.0762	99.9	116354160	397674	0.865451	324338	4.2484e+08		2010	303	0.0005	98.7407	98.7398	0.9828	4.1187	2474.24	44.0504	0.0781	99.8973	116351494	436681	0.865395	259568	3.63612e+08
1990	304	0.0037	93.0942	93.0727	2.5367	4.9767	3535.43	13.9734	0.2637	99.7851	40551846	12411.9	0.857583	102366	4.38965e+08		2000	304	0.0037	93.0942	93.0727	2.5369	4.977	3535.43	13.9725	0.2637	99.7851	40422979	14837.3	0.858037	107084	4.48787e+08		2010	304	0.0027	94.3229	94.2776	2.229	4.5557	5399.56	22.0651	0.2379	99.8057	40421646	14878.3	0.857958	91451.1	4.01097e+08
1990	305	0.0012	99.8774	99.8768	0.1281	1.8312	11289.1	36.6731	0.0099	99.9513	37186276	21695.1	0.915875	103641	4.85851e+08		2000	305	0.0012	99.8774	99.8768	0.1281	1.8312	11289.1	36.6731	0.0099	99.9513	37078857	23332.6	0.912453	102715	4.77462e+08		2010	305	0.0008	99.2611	99.2605	0.2972	2.0427	12364.2	20.8227	0.0443	99.9419	37078857	23266.5	0.912453	87710.3	4.26246e+08
1990	306	0.0016	96.4694	96.2981	1.0658	3.2948	9451.43	41.6664	0.1768	99.8688	35458077	62307.3	0.876767	94959.6	1.48609e+08		2000	306	0.0016	96.4487	96.2774	1.0766	3.3085	9451.43	42.1418	0.1779	99.868	35578621	66788.9	0.877501	102777	1.56237e+08		2010	306	0.0016	95.7159	95.5441	1.4221	3.7409	6379.79	57.4926	0.2127	99.8434	35572436	65928.4	0.877318	84376.8	1.32078e+08
1990	307	0.0015	99.6341	99.6327	0.1749	2.1619	22756	13.0967	0.0243	99.9101	19290932	10262.9	0.887635	55200.8	1.82217e+08		2000	307	0.0015	99.6341	99.6327	0.1749	2.1619	22756	13.0967	0.0243	99.9101	19321009	9744.67	0.885955	54370	1.79072e+08		2010	307	0.0007	99.9144	99.9144	0.0406	2.0375	45513	N/A	0.0069	99.9178	19323055	9626.31	0.886126	46700.4	1.59386e+08
1990	308	0.0017	99.2667	99.2623	0.4265	2.1737	4816.96	59.4094	0.0479	99.9253	24468025	4849.46	0.827192	55422.3	1.38951e+08		2000	308	0.0017	99.2668	99.2624	0.4265	2.1737	4816.96	59.4094	0.0479	99.9253	24591024	3089.04	0.825026	58804.1	1.42812e+08		2010	308	0.0028	96.354	96.3483	2.319	4.17	2546.13	35.4533	0.1716	99.7868	24591024	3115.32	0.825026	49982.7	1.26312e+08
1990	309	0.0006	99.394	99.3726	0.5593	2.8401	4937.19	32.1955	0.0422	99.9224	70807257	222627	0.887701	202740	3.58449e+08		2000	309	0.0006	99.3687	99.3473	0.5814	2.8791	4841.32	32.4193	0.0436	99.9207	70604148	208984	0.881663	222888	3.97948e+08		2010	309	0.001	99.2409	99.177	0.652	2.9943	4492.43	36.7975	0.0518	99.9158	70642278	221598	0.882921	185334	3.46921e+08
1990	310	0.0005	98.8166	70.2584	0.8803	3.1527	24515	22.8307	0.0684	99.9026	63259565	87894	0.917119	165439	4.34005e+08		2000	310	0.0005	98.8167	70.2583	0.8806	3.1532	24515	22.8645	0.0684	99.9026	63433698	80882.5	0.920966	184660	4.7703e+08		2010	310	0.0005	98.7703	70.2158	0.9062	3.1911	21012.6	27.7458	0.0719	99.901	63443835	83955.1	0.921284	157665	4.16907e+08
1990	311	0.0069	92.3756	92.2175	3.5099	9.0124	1689.74	17.5209	0.2797	99.6808	69983110	11643.8	0.778036	121647	2.18832e+08		2000	311	0.0069	92.3756	92.2175	3.5097	9.012	1689.74	17.5218	0.2797	99.6808	69808939	13207.3	0.774299	128127	2.25561e+08		2010	311	0.0043	93.5684	93.4936	3.2166	8.4767	1880.14	22.8473	0.2515	99.6951	69819463	12766	0.774738	105347	1.95112e+08
1990	312	0.0038	88.7771	88.6049	4.2448	9.9365	2537.71	12.419	0.3664	99.6442	74187020	45597.2	0.75622	159955	3.715e+08		2000	312	0.0038	88.7773	88.6051	4.2439	9.9332	2537.71	12.4071	0.3664	99.6443	74067363	40957.6	0.756279	149233	3.46152e+08		2010	312	0.0027	89.1012	88.9298	4.135	9.7191	2902.04	15.3211	0.3642	99.6529	74127622	41187	0.75708	137191	3.21627e+08
1990	313	0.0034	91.573	91.5528	3.1389	9.554	3314.31	16.6854	0.2974	99.7118	103533169	29711.3	0.805694	204799	5.88136e+08		2000	313	0.0034	91.5731	91.5529	3.1391	9.5543	3314.31	16.6848	0.2974	99.7118	103542395	28615.5	0.808304	209040	5.9166e+08		2010	313	0.0033	92.8388	92.8139	2.8896	8.9997	3603.19	18.1296	0.2661	99.7318	103596273	25572.1	0.809326	172111	5.12467e+08
1990	314	0.0073	94.9096	94.8014	3.4353	6.6738	1472.98	32.2718	0.2256	99.7059	44900892	5409.78	0.775032	70688.7	9.29485e+07		2000	314	0.0073	94.9054	94.7971	3.442	6.6836	1466.63	32.3786	0.2258	99.7054	45043097	6424.79	0.772724	75081.6	9.80619e+07		2010	314	0.0068	93.7019	93.6249	4.0735	7.6043	1366.5	31.724	0.2631	99.6535	45019679	6847.08	0.772352	62816.5	8.41605e+07
1990	315	0.0043	94.1755	94.1566	1.874	3.9656	6023.39	3.5765	0.2228	99.8141	26381944	10176.1	0.906332	56168.5	2.28821e+08		2000	315	0.0043	94.1759	94.157	1.8737	3.9653	6023.39	3.577	0.2228	99.8141	26544322	10229.3	0.914102	63121.3	2.53662e+08		2010	315	0.0043	94.2039	94.1848	1.8665	3.9368	6023.65	3.5883	0.2221	99.8163	26544322	10317.6	0.914102	56100.7	2.34275e+08
1990	316	0.0043	95.9852	53.3708	2.3499	4.4282	5637.07	62.8644	0.1886	99.7566	23043618	6421.96	0.896095	45611.7	2.67977e+08		2000	316	0.0043	95.9856	53.3706	2.3499	4.4282	5637.07	62.8644	0.1886	99.7566	22948477	7994.86	0.89239	49199.5	2.88769e+08		2010	316	0.0043	96.7108	52.9139	2.2303	4.3073	5838.34	39.6747	0.1635	99.7644	22948477	8649.4	0.89239	43402.3	2.66382e+08
1990	317	0.0063	92.8563	92.8416	3.356	6.7006	4059.72	2.654	0.2584	99.7248	47239794	4733.78	0.850251	88659	2.80539e+08		2000	317	0.0063	92.8565	92.8418	3.3559	6.7011	4059.72	2.6541	0.2584	99.7248	47260133	4370.12	0.851126	96307.4	2.99914e+08		2010	317	0.0063	92.7321	92.7173	3.4765	6.8773	3836.67	4.977	0.2628	99.7161	47271510	4233.28	0.851665	70146.4	2.34855e+08
1990	318	0.0077	94.1209	94.0948	4.1673	6.1595	1477.98	4.0427	0.2256	99.6456	22531022	9852.55	0.827679	42882.6	1.62437e+08		2000	318	0.0077	94.1208	94.0947	4.1673	6.1595	1477.98	4.0427	0.2256	99.6456	22511540	9887.41	0.823616	44919.2	1.6859e+08		2010	318	0.0077	95.3209	95.2943	3.3772	5.3484	1504.35	4.8155	0.1909	99.7162	22510920	10019.9	0.823477	35036.7	1.40561e+08
1990	319	0.0104	91.2774	90.991	3.6726	6.4933	2361.24	1.271	0.2965	99.6777	34479440	10118.3	0.887374	70301.3	1.25136e+08		2000	319	0.0104	91.277	90.9906	3.6723	6.4928	2361.24	1.2711	0.2965	99.6778	34624297	11009.9	0.891042	75749	1.33492e+08		2010	319	0.0036	98.1893	98.1597	0.9052	3.0309	6257.28	4.5619	0.0909	99.8879	34624297	11141.3	0.891042	64866.4	1.20218e+08
1990	320	0.0112	94.1901	94.1478	4.0144	7.3147	2395.28	12.4092	0.2307	99.6405	36904443	16755.3	0.799738	61538.1	1.49963e+08		2000	320	0.0112	94.1902	94.1479	4.0146	7.3127	2395.28	12.4087	0.2307	99.6406	36757858	17390.6	0.791015	66687.3	1.59391e+08		2010	320	0.0079	94.9167	94.8729	3.7451	6.9548	2395.28	13.4996	0.2098	99.6648	36765329	16503	0.791357	50856.5	1.28673e+08
1990	321	0.0093	94.7167	94.6153	2.8136	7.5068	2195.63	31.612	0.2404	99.7509	75446809	15750.3	0.851817	109020	4.02981e+08		2000	321	0.0093	94.7167	94.6152	2.8135	7.5066	2195.63	31.6128	0.2404	99.7509	75559571	19425.9	0.853763	122195	4.41415e+08		2010	321	0.0106	92.1037	91.9548	3.4842	8.7477	2325.9	32.4894	0.3261	99.6967	75559571	21105.4	0.853763	103984	4.01366e+08
1990	322	0.0069	96.0979	96.0611	2.1482	5.4341	2322.52	13.7809	0.1695	99.7886	50308826	22128.9	0.855214	89390.8	1.62529e+08		2000	322	0.0069	96.0968	96.0599	2.1502	5.4371	2322.52	13.9211	0.1696	99.7885	50188290	19473.5	0.853501	97897.8	1.74127e+08		2010	322	0.0077	92.1273	91.9066	3.1802	6.986	2264.46	25.1659	0.3069	99.7045	50186957	21295.2	0.853436	83216.8	1.55716e+08
1990	323	0.0048	87.4845	87.4119	5.5366	21.4958	2213.78	17.6184	0.3987	99.5124	241929997	96262.6	0.753491	321482	6.05561e+08		2000	323	0.0048	87.4845	87.4119	5.5363	21.4937	2213.78	17.623	0.3987	99.5124	241614668	89259.8	0.753561	375868	6.95714e+08		2010	323	0.0037	88.3031	88.2347	5.228	20.4235	2478.3	21.9732	0.385	99.5418	241666981	90386	0.753808	290278	5.57903e+08
1990	324	0.0146	80.454	80.3498	8.7316	11.8459	1565.98	3.21	0.4982	99.1968	26434252	5727.89	0.709595	35416	8.544e+07		2000	324	0.0146	80.4542	80.35	8.7314	11.8456	1565.98	3.2101	0.4982	99.1968	26477390	4969.25	0.714737	39682.6	9.53743e+07		2010	324	0.0141	78.8557	78.7163	9.3593	12.5809	1533.14	3.0331	0.5201	99.1205	26477390	4987.29	0.714737	29804.2	7.29058e+07
1990	325	0.0072	95.7898	95.7716	2.0447	5.7571	3300.78	16.4119	0.1789	99.7845	54000098	20923.3	0.808244	92252.3	2.35262e+08		2000	325	0.0072	95.7669	95.7487	2.0631	5.7862	3273.95	17.7336	0.1805	99.783	53826269	22954.6	0.804558	102478	2.55341e+08		2010	325	0.0062	96.6731	96.6623	1.6234	5.0873	3763.53	21.7103	0.1511	99.8174	53864291	21741	0.805733	83248.5	2.17633e+08
1990	326	0.0114	89.0275	88.1575	6.0406	13.3936	2088.19	21.1595	0.3741	99.4511	66043060	21843.4	0.753825	89210.8	1.34961e+08		2000	326	0.0114	89.0272	88.1572	6.0414	13.393	2088.19	21.1598	0.3741	99.4511	66047362	17082.3	0.757429	107566	1.55903e+08		2010	326	0.0107	91.9667	91.1652	4.0502	9.8151	2818.52	25.8515	0.303	99.6248	66046029	17272.7	0.757383	85635.6	1.27467e+08
1990	327	0.0128	81.1041	70.1631	6.185	11.5691	1304.32	61.9	0.585	99.4444	46854201	3329.37	0.747431	56665	1.04822e+08		2000	327	0.0128	81.1041	70.1632	6.185	11.5691	1304.32	61.8969	0.585	99.4444	46832868	2414.14	0.746882	62236.2	1.13857e+08		2010	327	0.0084	87.9161	87.8239	4.4467	8.8833	1453.09	66.9515	0.4486	99.6093	46832868	2638.18	0.746882	49919.7	9.42229e+07
1990	328	0.0151	90.6435	90.3834	5.6568	10.1537	1133.45	9.1109	0.3292	99.4981	42252137	7168.45	0.797142	62889.8	1.96278e+08		2000	328	0.0151	90.6439	90.3838	5.6555	10.1519	1133.45	9.0705	0.3292	99.4982	42147720	6741.97	0.796459	66967.5	2.04885e+08		2010	328	0.0136	91.0315	90.7733	5.5357	9.9783	1161.91	11.9149	0.322	99.5098	42135723	6890.61	0.795804	48779.7	1.59689e+08
1990	329	0.0123	81.7722	72.8178	8.162	19.1889	1520.27	11.3527	0.4952	99.2247	83069426	15784.7	0.761328	101427	3.62205e+08		2000	329	0.0123	81.7777	72.8177	8.1542	19.1729	1523.73	11.197	0.4949	99.2255	83375944	13166.8	0.760707	114895	3.94668e+08		2010	329	0.012	82.0972	73.2946	8.1822	19.224	1509.97	11.638	0.4898	99.2245	83391128	13368.5	0.760945	89431.5	3.24845e+08
1990	330	0.007	93.4919	93.3707	3.1426	7.9914	2110.82	18.7564	0.2578	99.7225	72472116	7166.64	0.78296	95883	1.97224e+08		2000	330	0.007	93.4918	93.3707	3.1427	7.9916	2110.82	18.7559	0.2578	99.7225	72393876	6193.95	0.780674	103280	2.10801e+08		2010	330	0.0064	93.4684	93.3511	3.1905	8.0796	2143.92	17.9519	0.2593	99.7182	72419823	6578.91	0.781529	78115.1	1.65778e+08
1990	331	0.0082	87.9214	87.5182	6.3715	12.9203	1372.76	13.1036	0.3867	99.4495	61819590	7007.59	0.723903	53231.5	3.85877e+07		2000	331	0.0082	87.9216	87.5184	6.3709	12.9192	1372.76	13.1099	0.3867	99.4495	61621672	8707.67	0.722246	64178	4.62262e+07		2010	331	0.0082	87.7844	87.3805	6.4822	13.1059	1331.38	15.6784	0.3947	99.4396	61621672	10173.1	0.722246	55573	4.19517e+07
1990	332	0.0039	87.715	87.7074	5.7419	8.2763	1516.61	7.8844	0.3772	99.4961	25917207	85145.1	0.695615	24042.9	1.13471e+07		2000	332	0.0039	87.7156	87.7079	5.7419	8.2763	1516.61	7.8844	0.3772	99.4961	25812886	78458	0.693084	28382.5	1.27303e+07		2010	332	0.0044	87.614	87.6055	5.8431	8.3912	1494.64	9.0193	0.3849	99.4863	25812886	9854	0.693084	26133	1.22874e+07
1990	333	0.0083	89.7573	89.6364	6.3046	9.5499	1043.81	11.1993	0.336	99.4201	28895081	68326	0.705896	23700.1	1.40859e+07		2000	333	0.0092	89.7473	89.5849	6.3108	9.5572	1043.81	11.5006	0.3367	99.4198	28992882	69125	0.712439	30774.4	1.69409e+07		2010	333	0.0092	89.6089	89.2383	6.4006	9.6655	1058.3	8.2538	0.3412	99.4124	28992882	8245	0.712439	29889.7	1.69279e+07
1990	334	0.0019	92.3407	92.3107	5.0839	9.2522	1165.96	3.6261	0.2715	99.5656	46182997	134541	0.716495	30916.8	1.05311e+07		2000	334	0.0019	92.3415	92.3115	5.083	9.2499	1165.96	3.6267	0.2714	99.5658	46371884	135425	0.717733	37976	1.26913e+07		2010	334	0.0027	92.1857	92.1553	5.1305	9.3208	1162.27	2.8602	0.2758	99.5627	46371884	154314	0.717733	35623.3	1.25055e+07
1990	335	0.0299	83.5997	46.6053	18.3768	32.6789	122.737	25.972	0.5144	98.3173	40777346	1.17354e+06	0.445067	150564	2.04836e+06		2000	335	0.0321	72.7664	40.7181	22.1529	38.8178	132.436	26.1799	0.6742	97.7181	38169706	969079	0.395515	128782	1.85297e+06		2010	335	0.0615	53.9151	28.8473	22.2796	39.0218	186.892	32.132	0.8194	97.0015	34835291	725393	0.330454	118392	1.92032e+06
1990	336	0.0515	73.9724	58.19	24.2438	31.929	115.14	70.0816	0.7509	97.5651	22074975	588888	0.483254	80983.8	597946		2000	336	0.0435	69.003	53.933	24.6185	32.3863	117.691	72.253	0.8237	97.3846	21522856	530743	0.461988	73548.7	558395		2010	336	0.0636	53.3706	29.4499	27.4615	35.858	120.114	76.6289	0.9696	96.3716	19729324	378433	0.40992	63524.3	537247
1990	337	0.0279	67.7282	42.3077	20.9287	42.0068	127.018	40.614	0.8419	97.6539	51000929	1.27401e+06	0.546584	145143	2.32063e+06		2000	337	0.0405	60.9018	35.102	23.8034	47.3756	116.283	42.3215	0.9389	97.1009	48815549	1.08607e+06	0.519907	124284	2.09483e+06		2010	337	0.0886	41.5282	17.3556	23.9	47.5543	143.569	50.1331	1.0782	95.9872	45416678	789122	0.473391	110744	2.03351e+06
1990	338	0.0019	96.1345	96.1281	5.1282	9.2029	426.904	42.1666	0.1923	99.5564	39688379	418105	0.789738	177739	7.71296e+07		2000	338	0.0019	95.9682	95.9663	5.253	9.3685	419.665	42.0595	0.1992	99.5466	39428994	403933	0.783739	156859	6.81473e+07		2010	338	0.005	93.8033	93.7618	7.0464	11.9044	364.477	40.6505	0.2757	99.3977	39096177	391588	0.77518	186882	8.65426e+07
1990	339	0.0154	87.3467	80.6543	14.6963	26.6688	184.503	43.9822	0.4681	98.7378	51116172	739666	0.684826	263210	7.05574e+07		2000	339	0.0198	86.2605	79.9115	15.0222	27.2139	182.581	44.5906	0.4954	98.6984	51251616	664044	0.689048	236088	6.21443e+07		2010	339	0.0248	81.5691	75.7927	17.5803	31.522	174.604	46.501	0.6016	98.4182	50182042	594391	0.672772	270309	7.75961e+07
1990	340	0.0244	33.9521	63.2992	5.3275	7.2478	398.677	51.594	0.7489	98.7818	15346964	89086.9	0.897534	25389.8	6.48517e+06		2000	340	0.0227	32.5134	63.2955	6.7431	8.7331	341.502	49.4936	0.7854	98.4211	15289861	80531.9	0.891854	22191.3	5.81218e+06		2010	340	0.0295	29.9519	63.5682	7.5731	9.6025	343.498	53.173	0.8204	98.1406	15172346	72265.2	0.886362	22881.2	6.17711e+06
1990	341	0.0284	47.7608	44.0945	14.0725	16.9192	154.929	40.5219	0.8918	97.7333	15724703	250476	0.722388	30063	1.17943e+06		2000	341	0.0384	43.9799	44.1533	16.3263	19.3083	144.128	39.6993	0.9545	97.2189	15183221	217315	0.702503	25647.8	1.05431e+06		2010	341	0.0511	36.0261	44.3191	16.7327	19.7383	173.792	43.5023	1.0378	96.6072	14649021	169618	0.6786	24753	1.07147e+06
1990	342	0.0131	82.6839	82.3472	18.1408	38.8978	92.1842	39.0226	0.5792	98.3431	67151587	1.69967e+06	0.560693	185184	1.10033e+07		2000	342	0.0182	77.4033	76.3578	22.5955	47.9785	84.208	38.3353	0.6927	97.82	64991088	1.4543e+06	0.539499	158534	9.82247e+06		2010	342	0.0234	70.3954	69.0692	24.4578	51.7736	91.0494	45.3908	0.8295	97.4385	63465613	1.3758e+06	0.529611	177183	1.14859e+07
1990	343	0.0433	80.4757	39.5893	23.309	26.2523	105.413	29.0803	0.6169	97.716	15084501	341009	0.506373	53334.6	4.37236e+06		2000	343	0.044	76.2004	36.4071	25.4599	28.3499	106.504	29.9384	0.6934	97.3927	14840780	307740	0.497172	44237.3	3.68909e+06		2010	343	0.0815	66.4608	30.6535	27.9768	30.8164	112.388	30.04	0.8181	96.7969	14035200	252980	0.455307	48660.5	4.63404e+06
1990	344	0.0097	94.748	49.712	6.1457	10.0477	365.165	42.0746	0.2447	99.4735	35474379	187076	0.870204	237334	1.31828e+08		2000	344	0.0104	94.5532	49.6945	6.1927	10.1045	371.024	40.9555	0.2509	99.4695	35621831	181158	0.868841	207463	1.13339e+08		2010	344	0.0169	92.4304	48.2009	7.95	12.4113	354.892	39.7906	0.3191	99.3264	35278026	174909	0.858184	270956	1.53864e+08
1990	345	0.0045	95.6398	95.5562	6.8977	12.1049	335.755	44.1914	0.2098	99.4263	44112894	384354	0.807353	292540	1.26185e+08		2000	345	0.0051	95.1675	95.0837	7.0457	12.3133	338.649	42.7866	0.2249	99.414	43793129	371402	0.80019	250167	1.06921e+08		2010	345	0.0105	91.4158	91.2145	9.3325	15.6968	329.818	39.8764	0.3359	99.2121	42979264	331430	0.78095	322756	1.4611e+08
1990	346	0.0009	98.9428	98.941	2.0196	4.9282	1112.25	44.4851	0.066	99.8007	45932326	154845	0.928494	325524	2.72939e+08		2000	346	0.0009	98.9412	98.9394	2.0262	4.9311	1108.66	44.455	0.0661	99.8005	45954182	130411	0.935195	286253	2.34477e+08		2010	346	0.0018	98.2736	98.26	2.5184	5.6487	1123.2	44.8354	0.0988	99.7657	45804287	128418	0.933146	404796	3.48263e+08
1990	347	0.0112	96.8461	48.9776	2.7436	3.8396	1011.84	52.2135	0.1591	99.7329	13075202	39287.3	0.929223	87876.9	9.87824e+07		2000	347	0.0143	96.6862	48.844	2.8371	3.9038	1066.84	51.4847	0.166	99.7278	13027176	36652.7	0.930067	77664.3	8.58862e+07		2010	347	0.0092	95.6729	48.5671	3.9595	4.7697	991.412	50.3227	0.2094	99.6422	12975790	37321.1	0.925236	107348	1.24929e+08
1990	348	0.0188	91.4416	51.6677	4.1494	6.2026	1404.35	35.3212	0.3177	99.615	24426773	72772.6	0.927738	146044	1.13586e+08		2000	348	0.0183	91.4858	51.6839	4.0993	6.1438	1457.96	33.9413	0.3151	99.6193	24642022	64239.1	0.93133	139154	1.06017e+08		2010	348	0.0246	90.4239	51.3489	5.0182	7.139	1130.13	47.9757	0.3625	99.5551	24569929	70076.3	0.926739	202392	1.64075e+08
1990	349	0.0116	96.3388	59.0268	4.0256	5.1145	643.006	45.0643	0.1808	99.6381	15226172	123843	0.825076	93743.8	5.27486e+07		2000	349	0.0116	96.2922	58.9943	4.0099	5.0871	646.455	43.9733	0.1825	99.6403	15077078	114695	0.829714	89482.9	4.73715e+07		2010	349	0.0149	94.8149	58.3792	5.6084	6.4625	466.756	45.1197	0.2414	99.5169	14963077	108122	0.821977	126581	7.14869e+07
1990	350	0.0082	96.1247	95.7026	4.6398	8.5973	460.513	44.3886	0.1929	99.6067	43783973	414442	0.801709	281264	1.5158e+08		2000	350	0.0085	96.1945	95.8069	4.4027	8.2399	472.812	43.0375	0.1894	99.6263	43795172	417160	0.797456	278058	1.47692e+08		2010	350	0.0152	93.6679	93.3147	6.4139	11.2312	374.35	42.9985	0.2789	99.4702	43264079	398790	0.783796	392348	2.26163e+08
1990	351	0.0025	95.6098	95.5847	6.6417	15.5936	303.541	42.6206	0.2111	99.4516	84092865	772877	0.79455	580022	2.84865e+08		2000	351	0.0044	95.166	95.102	6.7089	15.7196	313.178	42.064	0.2259	99.4458	83882575	749764	0.786603	506908	2.47883e+08		2010	351	0.0188	90.0947	78.3081	10.025	22.5505	267.946	38.0486	0.3693	99.1546	81989655	686230	0.764548	695257	3.67712e+08
1990	352	0.0075	96.1586	95.9215	3.2604	9.1272	986.326	41.411	0.1823	99.7183	103048645	404629	0.90927	774028	4.68464e+08		2000	352	0.0082	96.0567	95.8097	3.3434	9.3064	965.805	42.02	0.1871	99.7121	102949960	372877	0.908811	648611	3.89027e+08		2010	352	0.01	95.1639	94.7629	3.8477	10.3999	992.545	44.93	0.2255	99.675	102633332	379483	0.905464	1.00086e+06	6.40299e+08
1990	353	0.0212	92.9798	91.4802	4.9079	7.0578	1226.13	22.3711	0.2681	99.5527	24597363	52762	0.941586	169650	1.50405e+08		2000	353	0.0212	92.9707	91.4712	4.9203	7.0689	1218.23	23.109	0.2688	99.5516	24544311	57527.1	0.934216	156072	1.3894e+08		2010	353	0.0196	92.785	91.2442	5.1355	7.3017	1339.19	24.8021	0.2755	99.5342	24547597	61872.7	0.934612	233792	2.23411e+08
1990	354	0.0035	97.5411	97.4525	2.676	5.2276	1509.73	53.2574	0.1344	99.747	33506639	40670	0.96211	287291	2.64488e+08		2000	354	0.0043	97.7954	97.7272	2.3271	4.7871	1835.57	49.7825	0.1224	99.7732	33492073	37724	0.965778	303242	2.82967e+08		2010	354	0.0078	96.8248	96.2144	2.7873	5.3664	1667.63	56.7611	0.1676	99.7424	33292756	38639.3	0.957444	423347	4.31218e+08
1990	355	0.0016	97.6838	97.681	3.3408	5.4433	804.668	44.8476	0.1263	99.6919	24619976	160762	0.860656	139968	8.69818e+07		2000	355	0.0016	97.7075	97.7047	3.3202	5.4394	781.844	44.8403	0.125	99.6923	24865381	162944	0.860004	153416	9.69433e+07		2010	355	0.0057	96.2851	96.2108	4.9356	7.1922	601.619	46.0058	0.1868	99.5677	24747620	161833	0.854144	224284	1.53872e+08
1990	356	0.0099	94.5939	94.387	7.7905	17.0527	307.726	42.5735	0.248	99.3588	74359549	710918	0.790725	464920	1.81379e+08		2000	356	0.0122	93.8425	93.6234	8.2607	17.9524	311.536	40.9268	0.2701	99.3209	74082767	659762	0.788717	399412	1.54972e+08		2010	356	0.0162	89.7456	89.434	11.6108	24.4578	259.949	39.2771	0.3864	99.0306	72660527	602602	0.77042	496238	2.00925e+08
1990	357	0.0085	93.9231	93.7867	8.3744	13.3974	254.5	43.04	0.2709	99.3088	36571183	500161	0.734425	184124	7.87768e+07		2000	357	0.0203	90.2161	77.7894	11.9688	18.3589	181.163	37.2961	0.377	98.9908	35666421	386822	0.717061	161014	6.99539e+07		2010	357	0.0235	81.7081	71.1367	16.598	24.753	184.105	34.5105	0.5547	98.491	34120428	323460	0.677198	181875	8.53781e+07
1990	358	0.0031	97.1917	97.1499	3.1957	8.4303	693.136	46.3964	0.1528	99.7172	83543416	529479	0.864111	557624	6.26374e+08		2000	358	0.0025	96.8246	95.7426	3.4089	8.7641	603.298	36.5581	0.1629	99.7032	83715509	457709	0.871702	466256	5.02724e+08		2010	358	0.0048	95.1892	94.141	4.7163	11.3871	527.947	35.0471	0.2238	99.598	83100871	455898	0.863992	605055	6.92754e+08
1990	359	0.0053	98.4289	98.3459	1.5956	3.8876	1621.72	45.7904	0.0935	99.8298	32605348	115707	0.917204	239724	3.56706e+08		2000	359	0.0041	98.4084	98.3296	1.6237	3.91	1654.61	45.4214	0.0944	99.8285	32552410	109146	0.918085	198562	2.81949e+08		2010	359	0.0061	97.9838	97.9059	2.0897	4.4673	1316.6	42.2448	0.1139	99.7955	32465242	111140	0.915076	254711	3.84132e+08
1990	360	0.0169	93.3617	93.1208	5.7864	8.296	572.138	43.4096	0.2933	99.4818	23311804	169789	0.809145	167290	2.65507e+08		2000	360	0.0127	92.4924	92.2564	6.5284	9.0944	467.344	40.9167	0.3192	99.4202	23282553	154184	0.800718	137416	2.15838e+08		2010	360	0.0302	86.9917	56.8976	8.0782	10.7487	473.23	39.4272	0.4551	99.2702	22688026	130216	0.773842	172807	2.96477e+08
1990	361	0.0016	98.8798	98.8449	1.9403	3.4166	2461.32	54.4188	0.0671	99.7967	17348399	41702.1	0.948573	107627	1.71714e+08		2000	361	0.0016	98.8931	98.8582	1.9075	3.3868	2612.01	34.7404	0.0669	99.7993	17311341	44913.6	0.941197	95378.6	1.45684e+08		2010	361	0.0031	98.4001	98.3639	2.7004	4.0941	1580.14	42.1612	0.0936	99.7393	17305916	49458.5	0.94061	128423	2.08032e+08
1990	362	0.0017	98.4163	98.3317	2.3439	4.0824	929.774	46.5115	0.0931	99.7815	23819906	75773	0.926885	162996	1.22411e+08		2000	362	0.0017	98.354	98.2694	2.448	4.192	901.456	48.6872	0.0967	99.7739	23553384	74360.8	0.918958	149353	1.11392e+08		2010	362	0.009	96.6689	96.5943	3.4459	5.2413	749.312	44.6987	0.1652	99.7005	23361533	75135	0.909185	206535	1.64984e+08
1990	363	0.003	98.156	98.1492	3.737	5.6144	557.611	47.486	0.1056	99.6205	17707301	58679.7	0.920585	117102	1.5004e+08		2000	363	0.003	98.2125	98.2057	3.5794	5.4636	594.956	48.5317	0.1033	99.6334	17747580	58591.4	0.915218	100893	1.2706e+08		2010	363	0.009	96.8978	96.7384	4.3331	6.1399	720.378	50.3857	0.1578	99.5814	17627962	58222.8	0.908465	136498	1.83903e+08
1990	364	0.0019	98.6872	98.6816	1.7944	4.6493	2298.22	43.0804	0.0796	99.8178	48282296	94738.9	0.954411	363378	5.21061e+08		2000	364	0.0014	98.6802	98.6759	1.7985	4.6555	2357.53	44.6503	0.08	99.8168	48527099	93131.2	0.95407	372431	5.23481e+08		2010	364	0.0025	97.6203	97.6138	2.889	6.2983	1363.51	50.5114	0.131	99.7353	48273157	91765.1	0.947303	509424	7.70068e+08
1990	365	0.001	98.634	98.6335	2.3735	4.3814	1076.73	50.0288	0.084	99.7709	26610208	92765.1	0.924192	200370	2.32299e+08		2000	365	0.0015	98.4655	98.4648	2.5887	4.6321	1016.28	51.767	0.0935	99.7535	26558400	81413	0.925829	193589	2.21291e+08		2010	365	0.0015	97.6696	97.6537	3.3977	5.5235	905.428	50.7758	0.1299	99.6926	26453294	81518.9	0.920058	263064	3.24387e+08
1990	366	0.0034	98.2201	98.1089	1.8393	4.952	2038.11	51.1355	0.1033	99.8174	53775146	217783	0.907338	446511	5.68087e+08		2000	366	0.0027	98.1746	98.0722	1.8747	4.997	1897.88	51.5066	0.1056	99.8153	53680252	202511	0.907887	380161	4.67712e+08		2010	366	0.0046	96.5797	96.5173	3.4311	7.485	1235.06	49.3578	0.1743	99.6968	53367232	198318	0.905759	504682	6.69197e+08
1990	367	0.0009	99.3566	99.3566	1.1227	2.7633	2106.85	50.2149	0.0437	99.8401	13033276	29225.1	0.944881	103527	1.92005e+08		2000	367	0.0009	99.3281	99.3281	1.181	2.7987	2027.38	52.0424	0.0457	99.8368	13006342	24409.3	0.953503	107211	1.98982e+08		2010	367	0.0019	98.8688	98.8675	1.8728	3.3536	1492.38	44.0331	0.0688	99.7857	12958709	26674.3	0.947491	145818	2.9168e+08
1990	368	0.0005	99.5645	99.5645	0.8875	2.646	1937.53	46.7254	0.0301	99.8895	25382028	63953.9	0.934349	218922	1.01442e+08		2000	368	0.0005	99.4583	99.4583	1.0398	2.8116	1865.78	56.8331	0.037	99.8781	25325061	70343.1	0.92992	210334	9.67493e+07		2010	368	0.0005	99.367	99.367	1.1331	2.8517	1815.64	55.4457	0.0421	99.8753	25274949	75697.5	0.926196	224569	1.0234e+08
1990	369	0.0012	99.351	99.3498	1.3515	3.3582	1405.41	54.9571	0.0432	99.825	21685325	56664.4	0.935828	173983	5.52052e+07		2000	369	0.0012	99.2851	99.2838	1.4448	3.4418	1393.62	52.1545	0.0467	99.8186	21626941	55532.3	0.935396	176006	5.56156e+07		2010	369	0.0018	98.9601	98.9552	1.6805	3.6398	1370.64	49.1969	0.063	99.8032	21596530	59856.2	0.932591	194231	6.17794e+07
1990	370	0.0015	98.5343	98.5305	2.7437	5.9636	579.03	32.3731	0.0845	99.7393	42165866	214448	0.86991	222759	1.93107e+08		2000	370	0.0015	98.4614	98.4577	2.8439	6.1062	573.082	31.7487	0.0879	99.7316	42259175	209140	0.874925	245087	2.05985e+08		2010	370	0.0039	98.0065	97.9837	3.6851	7.3214	526.228	21.7592	0.1058	99.6662	42232962	214201	0.874386	270503	2.31958e+08
1990	371	0.0005	99.8602	99.8602	0.2666	2.5216	6257.2	44.3433	0.0112	99.8943	23745497	148598	0.816165	125739	2.58937e+07		2000	371	0.0005	99.8576	99.8576	0.2714	2.5261	6257.2	44.0536	0.0113	99.894	23523630	148073	0.809862	141722	2.86379e+07		2010	371	0.0005	99.8577	99.8577	0.2768	2.5306	6257.25	43.8683	0.0113	99.8937	23518639	166003	0.809852	113464	2.32443e+07
1990	372	0.0002	99.863	99.863	0.2134	2.2262	9488.04	63.0657	0.0113	99.9462	60629806	348427	0.829606	276005	9.94372e+07		2000	372	0.0002	99.845	99.845	0.2283	2.251	9298.28	63.0022	0.0126	99.9452	60871897	328311	0.832806	348925	1.23801e+08		2010	372	0.0002	99.7702	99.7702	0.3208	2.4002	7264.31	58.6816	0.0175	99.9386	60810207	365962	0.830586	281603	1.00645e+08
1990	373	0.0003	99.6985	99.6911	0.4718	3.0238	6034.84	59.3287	0.0224	99.936	118888385	624107	0.846079	532922	1.94527e+08		2000	373	0.0003	99.6823	99.6749	0.4886	3.0587	5915.76	59.289	0.0234	99.9349	118716855	625862	0.844292	656008	2.24457e+08		2010	373	0.0004	99.4214	99.3605	0.73	3.608	5167.86	64.0201	0.0396	99.9173	118745219	683825	0.844784	542439	1.90347e+08
1990	374	0.0002	99.681	99.681	0.2972	2.4463	12757.7	56.2045	0.0244	99.9336	55639584	284791	0.853322	261078	2.18561e+08		2000	374	0.0005	99.6368	99.6366	0.3222	2.478	12382.6	55.1905	0.0273	99.9321	55518425	282752	0.84922	318151	2.63741e+08		2010	374	0.0005	99.7655	99.7654	0.2568	2.3675	11694.6	39.8098	0.0181	99.9373	55650430	313200	0.853953	238975	1.96279e+08
1990	375	0.0004	99.7714	99.7714	0.2666	2.2849	10582.1	43.048	0.0179	99.92	30313139	207952	0.832158	162292	1.13954e+08		2000	375	0.0004	99.7597	99.7597	0.2782	2.2983	10582.1	42.2043	0.0187	99.9191	30470379	185524	0.840206	198794	1.35004e+08		2010	375	0.0004	99.7738	99.7738	0.2782	2.2753	10122.2	36.5482	0.0176	99.9206	30513271	195629	0.842807	146050	9.89702e+07
1990	376	0.0021	99.1132	96.9445	0.9079	2.9849	8623.19	27.5891	0.0547	99.8793	31279667	87530.7	0.873788	153973	1.28498e+08		2000	376	0.0021	99.1133	96.9446	0.9079	2.9818	8623.22	27.5891	0.0547	99.8795	31128172	82796.2	0.874105	161499	1.30511e+08		2010	376	0.0046	98.1085	96.1232	1.6606	3.8967	7316.73	15.8859	0.0975	99.823	31128315	91495.2	0.875161	143596	1.17945e+08
1990	377	0.0003	99.9206	99.9206	0.095	1.8319	72525.1	50.2053	0.007	99.9585	49534896	97001.8	0.93018	181086	1.76547e+08		2000	377	0.0003	99.8984	99.8984	0.118	1.8665	72525.1	60.8105	0.0087	99.9568	49499112	89718	0.93001	129581	1.26401e+08		2010	377	0.0022	99.4045	98.5461	0.6682	2.6928	21330.9	34.5655	0.0398	99.9152	49483363	94290.1	0.929601	138978	1.38002e+08
1990	378	0.0016	99.2705	80.7701	1.1225	4.1868	5240.1	38.8017	0.0482	99.8778	78828994	279315	0.84458	506434	2.94655e+08		2000	378	0.002	99.2552	80.7611	1.1329	4.2058	5108	39.5151	0.0493	99.8773	78708963	275554	0.843257	484570	2.68943e+08		2010	378	0.0021	98.954	80.3	1.3142	4.5458	4640.09	40.0256	0.0651	99.864	78780139	301174	0.845516	474888	2.6881e+08
1990	379	0.0002	99.9315	99.9315	0.0679	2.2446	47003.4	63.0334	0.0061	99.9522	80577293	319739	0.869406	311721	1.699e+08		2000	379	0.0002	99.9186	99.9186	0.0721	2.2517	50920.4	60.1383	0.0071	99.9519	80760324	315601	0.871118	226110	1.23137e+08		2010	379	0.0003	99.7134	99.7098	0.1966	2.48	22631.6	41.1093	0.0206	99.9429	80773700	330152	0.871525	225169	1.28877e+08
1990	380	0.0003	99.7713	99.7713	0.4271	2.7335	7826.08	58.1395	0.0177	99.9045	39800636	191112	0.85439	225561	1.24207e+08		2000	380	0.0003	99.7348	99.7348	0.4394	2.7494	7826.09	57.5691	0.02	99.9036	39986182	176199	0.863051	257879	1.37824e+08		2010	380	0.0003	99.5267	99.5267	0.6184	2.984	6916.18	58.7735	0.033	99.8906	40017213	194095	0.864604	224023	1.21697e+08
1990	381	0.0002	99.7783	99.7783	0.4362	3.3927	4496.98	29.9806	0.017	99.9043	71866271	594698	0.759453	344622	3.70765e+08		2000	381	0.0004	99.7693	99.769	0.4501	3.4187	4357.53	32.1871	0.0176	99.9036	71799429	610221	0.75623	379342	4.04321e+08		2010	381	0.0005	99.0379	99.0378	0.8412	4.151	3674	44.075	0.0605	99.8736	71902005	650072	0.759389	338464	3.62832e+08
1990	382	0.0018	98.5912	98.5908	2.4203	5.4272	1405.89	24.1696	0.0805	99.7437	34375187	255104	0.751487	155729	7.76525e+07		2000	382	0.0033	98.4025	98.3817	2.4049	5.407	1398.65	24.2765	0.0887	99.7444	34442255	258322	0.75079	191489	9.17471e+07		2010	382	0.0041	97.8851	97.8582	2.9006	6.0442	1317.18	29.92	0.1123	99.7058	34427551	278259	0.752041	162893	7.86662e+07
1990	383	0.0008	99.4612	99.4558	0.7834	3.1922	4489.67	64.2851	0.0372	99.8933	48761717	314465	0.784791	320756	1.00736e+08		2000	383	0.0008	99.3793	99.3739	0.8236	3.254	4489.67	63.7468	0.042	99.8902	48907861	321394	0.784937	298596	9.09239e+07		2010	383	0.0019	98.858	98.8029	1.2409	3.8923	3251.18	63.2698	0.0703	99.8584	48785376	342269	0.784481	289953	9.10224e+07
1990	384	0.0006	99.8381	99.8381	0.278	2.2931	10771.1	54.7486	0.013	99.9316	42630868	277106	0.805954	199195	1.94143e+08		2000	384	0.0006	99.809	99.809	0.2848	2.3013	10771.1	54.1668	0.0149	99.9311	42399166	293281	0.801313	203304	1.99762e+08		2010	384	0.0003	99.6991	99.6991	0.4445	2.5179	6594.59	36.3776	0.0222	99.9202	42430164	317889	0.803483	179717	1.78205e+08
1990	385	0.0013	99.4577	99.15	0.4461	2.3958	9664.4	60.9648	0.0374	99.9327	50517591	286042	0.799274	215452	1.52731e+08		2000	385	0.0016	99.384	99.073	0.4711	2.4346	9428.69	59.9199	0.0415	99.9308	50981328	266017	0.807744	192572	1.31602e+08		2010	385	0.0008	99.0649	98.7541	0.6651	2.7338	10173.1	62.7829	0.0593	99.9164	50912984	286118	0.807872	163071	1.16081e+08
1990	386	0.0014	98.6596	98.5201	1.1666	4.8432	3572.86	52.4163	0.0853	99.8749	108617456	777199	0.739669	449396	2.42136e+08		2000	386	0.0019	98.5306	97.7292	1.2743	5.092	3486.08	51.954	0.0921	99.8669	108464503	784237	0.73815	404251	2.12113e+08		2010	386	0.0028	97.9532	97.1542	1.6044	5.8519	3108.53	49.9183	0.1205	99.8421	108394967	876894	0.739868	367391	2.00073e+08
1990	387	0.0004	98.7967	98.7964	0.7321	3.5073	7697.22	54.599	0.0769	99.8922	63546901	395980	0.807711	344320	9.03111e+07		2000	387	0.0004	98.7971	98.7968	0.6986	3.4485	8980.09	58.2453	0.0773	99.8948	63632766	393554	0.807841	266838	6.96441e+07		2010	387	0.0006	98.7404	98.6349	0.8425	3.6974	7347.37	51.5523	0.0807	99.8825	63641817	417226	0.808385	236981	6.41617e+07
1990	388	0.0003	99.795	99.795	0.3555	2.2789	5011.35	48.3406	0.0163	99.9305	40366970	138729	0.805455	120854	1.1965e+08		2000	388	0.0003	99.7845	99.7845	0.3694	2.2982	4852.26	47.3276	0.017	99.9294	40560904	134152	0.810251	112020	1.11827e+08		2010	388	0.0003	99.733	99.733	0.4322	2.3847	4495.47	47.6516	0.0205	99.9247	40580992	151210	0.811355	103738	1.048e+08
1990	389	0.0004	98.8655	98.8623	1.1484	3.8973	3030.07	40.2615	0.0705	99.8759	66015630	280477	0.801194	224765	1.50689e+08		2000	389	0.0004	98.6352	98.632	1.2551	4.0849	2976.29	39.0116	0.082	99.8676	66101047	276201	0.803231	207513	1.38554e+08		2010	389	0.0006	98.4451	98.4124	1.415	4.3638	2566.31	43.0629	0.0919	99.856	66135471	298752	0.804667	191151	1.29423e+08
1990	390	0.0003	98.2261	98.2261	1.577	5.515	2162.4	53.2126	0.1001	99.8407	98491917	573017	0.803843	338537	1.83867e+08		2000	390	0.0003	98.1541	98.1541	1.6162	5.594	2174.98	53.1454	0.1034	99.8378	98325161	578550	0.803016	298419	1.61246e+08		2010	390	0.0011	97.9177	97.9128	1.7686	5.9125	1968.95	32.7227	0.1137	99.8266	98302656	642201	0.80311	232968	1.32282e+08
1990	391	0.0002	96.3098	96.3098	2.2893	6.3952	1770.13	65.2615	0.1835	99.7628	64207541	299318	0.807279	253936	1.6176e+08		2000	391	0.0002	96.3103	96.3103	2.2892	6.392	1770.14	65.2591	0.1835	99.763	63737937	293031	0.802028	223234	1.4365e+08		2010	391	0.0021	95.0249	94.992	2.9516	7.544	1511.76	60.4463	0.2309	99.7083	63624994	289430	0.800396	166091	1.11889e+08
1990	392	0.0003	94.5222	94.5174	2.7344	8.761	1280.09	38.2436	0.2481	99.7431	117489258	641752	0.801348	382186	2.22188e+08		2000	392	0.0006	94.2938	94.2867	2.8753	9.0828	1236.39	37.5388	0.2572	99.7319	117496227	635962	0.80188	335146	1.92865e+08		2010	392	0.002	93.8447	93.8011	3.0288	9.4437	1213.19	35.8394	0.2739	99.7179	117358432	664308	0.800611	249979	1.54248e+08
1990	393	0.0015	95.11	95.0948	6.43	13.26	425.574	40.9663	0.2331	99.4354	58329862	416996	0.73048	195881	5.2664e+07		2000	393	0.0017	94.7079	94.6846	6.4718	13.3308	427.923	40.8301	0.2471	99.4298	58281762	425114	0.731799	171478	4.66933e+07		2010	393	0.0032	94.085	94.0504	6.8268	13.9345	419.813	42.3766	0.268	99.3995	57979263	456019	0.726688	148437	4.19992e+07
1990	394	0.0002	99.5308	99.5308	0.2832	2.7402	13990.3	54.775	0.0342	99.926	67137238	314154	0.823259	403476	8.45253e+08		2000	394	0.0002	99.5172	99.5172	0.2948	2.7576	13254	54.4152	0.0351	99.9253	67451205	310104	0.82481	344539	7.0001e+08		2010	394	0.0002	99.4105	99.4105	0.3854	2.9174	10492.8	55.0112	0.0421	99.9186	67450925	322870	0.824999	284565	5.8381e+08
1990	395	0.0002	98.6276	98.6276	0.7947	3.7866	7414.47	51.8541	0.0857	99.8912	78993367	552753	0.789464	421217	3.42648e+08		2000	395	0.0002	98.5698	98.5698	0.8269	3.8495	7325.14	52.1526	0.0889	99.8886	79083146	563989	0.793097	340521	2.66134e+08		2010	395	0.0005	98.5408	98.5311	0.8833	3.9592	7238.01	49.4982	0.0883	99.8847	79074262	578151	0.793333	296084	2.3995e+08
1990	396	0.001	99.3455	99.3452	0.6423	3.5265	8950.79	45.5859	0.0446	99.9044	85780312	276188	0.861373	459932	1.38837e+09		2000	396	0.001	99.3392	99.3389	0.6462	3.5337	8950.8	45.765	0.0451	99.9041	85831658	284416	0.85836	420645	1.26061e+09		2010	396	0.0011	99.317	99.3166	0.6818	3.5876	8583.13	42.0161	0.0456	99.9024	85799293	295532	0.857639	313441	9.5998e+08
1990	397	0.0007	97.9774	97.9596	0.6785	3.7129	23022.3	21.201	0.1032	99.8903	75717487	340747	0.830048	373068	3.08217e+08		2000	397	0.0007	97.9584	97.9406	0.6905	3.7357	22136.8	23.8538	0.1047	99.8893	75737311	325645	0.833498	287853	2.30195e+08		2010	397	0.0007	99.0503	99.0473	0.401	3.1711	21318	46.9324	0.0598	99.9132	75784275	336411	0.834558	271852	2.21204e+08
1990	398	0.0002	99.9261	99.9261	0.1098	2.188	25511.8	N/A	0.0061	99.9441	56502554	129133	0.877944	230470	9.10787e+08		2000	398	0.0002	99.9261	99.9261	0.1101	2.1885	25511.8	N/A	0.0061	99.9441	56643112	131201	0.873738	220075	8.45901e+08		2010	398	0.0002	99.8802	99.8802	0.1336	2.2232	24011.3	N/A	0.0093	99.9424	56644445	138892	0.873797	159760	6.31165e+08
1990	399	0.0002	99.6248	99.6248	0.4918	3.059	5034.57	62.9414	0.0273	99.9025	56407223	142491	0.889093	219006	3.35454e+08		2000	399	0.0002	99.61	99.61	0.5087	3.072	5034.62	62.7654	0.0282	99.9019	55820353	155642	0.875567	194731	3.0176e+08		2010	399	0.0007	99.5209	99.5205	0.5043	3.0547	6196.52	66.8755	0.0336	99.9029	55816540	166346	0.875273	146404	2.42116e+08
1990	400	0.0002	99.0953	99.0953	0.8482	3.4457	20888.4	27.4281	0.054	99.8957	69204375	281164	0.869151	259801	6.5454e+08		2000	400	0.0002	99.0827	99.0827	0.8505	3.4461	20888.4	27.9624	0.0549	99.8957	69379726	261707	0.86991	254495	6.3064e+08		2010	400	0.0002	99.0124	99.0124	0.9553	3.631	13192.8	40.5988	0.0594	99.8876	69377679	275517	0.869912	193063	5.06501e+08
1990	401	0.0003	99.9664	99.9664	0.0627	1.7915	163548	N/A	0.003	99.9584	46361276	88284.4	0.910478	196404	5.48094e+08		2000	401	0.0003	99.9664	99.9664	0.0627	1.7912	163548	N/A	0.003	99.9585	46257168	95192.9	0.908586	194391	5.36257e+08		2010	401	0.0003	99.9574	99.9574	0.0805	1.8117	65419.8	47.2749	0.004	99.9574	46247604	99296.6	0.908297	139662	3.99617e+08
1990	402	0.0001	99.8768	99.8768	0.1319	3.2753	23906.3	51.7305	0.0101	99.9274	125798086	453386	0.913075	497373	7.62635e+08		2000	402	0.0003	99.8674	99.8672	0.1442	3.2967	21060.4	49.0573	0.0107	99.9267	125263826	452313	0.908865	513456	7.84372e+08		2010	402	0.0001	99.8378	99.8378	0.1366	3.2723	22113.6	49.1724	0.0126	99.9276	125259393	489167	0.908706	382014	6.15593e+08
1990	403	0.0001	99.9301	99.9301	0.1021	2.5902	25270	57.6545	0.0062	99.9432	98022165	503104	0.865618	364406	6.96513e+08		2000	403	0.0001	99.9278	99.9278	0.1038	2.5934	25270	57.2997	0.0063	99.9431	98040873	492721	0.863049	363746	6.87463e+08		2010	403	0.0003	99.8324	99.8323	0.198	2.7896	17688.9	43.183	0.013	99.9361	98051675	539718	0.863319	272547	5.38595e+08
1990	404	0.0004	99.9549	99.9549	0.0822	1.8319	18619.9	50.9203	0.0041	99.9496	33951889	80564.6	0.885395	87793	2.60685e+08		2000	404	0.0004	99.9549	99.9549	0.0823	1.8284	18619.9	50.8825	0.0041	99.9498	33854257	78154.7	0.880664	82664.7	2.48095e+08		2010	404	0.0004	99.9554	99.9554	0.0642	1.8043	30257.3	54.7756	0.0041	99.951	33858969	83007.8	0.880956	62354.5	2.01555e+08
1990	405	0.0002	99.9518	99.9518	0.0531	1.6156	44193.7	49.3984	0.0045	99.9735	67778093	319179	0.876411	159752	4.85905e+08		2000	405	0.0002	99.9518	99.9518	0.0531	1.615	44193.7	49.3984	0.0045	99.9735	67816224	296649	0.876866	166658	5.00351e+08		2010	405	0.0002	99.9618	99.9618	0.0492	1.5849	44194.7	54.6082	0.0037	99.9748	67873047	307330	0.878469	123274	3.99208e+08
1990	406	0.0006	99.3282	99.326	0.995	3.518	2140.22	63.1076	0.0448	99.8914	66377425	293834	0.845439	153904	1.29547e+08		2000	406	0.0006	99.3067	99.3045	1.0016	3.5263	2149.69	61.6047	0.046	99.8908	66312824	289526	0.844725	139382	1.16667e+08		2010	406	0.0016	99.0349	99.0161	1.1947	3.853	2032.78	60.2557	0.0602	99.8765	66276860	309639	0.844335	104371	9.47624e+07
1990	407	0.0008	99.6567	99.5004	0.4063	2.509	6862.85	31.0802	0.0246	99.9269	54752019	115577	0.920056	457584	2.52209e+08		2000	407	0.0008	99.6401	99.4839	0.4219	2.5331	6742.45	30.394	0.0256	99.9258	54573468	106154	0.916824	454181	2.50472e+08		2010	407	0.001	99.1374	98.9806	0.9382	3.3055	3176.42	29.225	0.0537	99.8877	54593943	108839	0.917929	376403	2.12077e+08
1990	408	0.0004	99.9289	99.9274	0.1053	2.2287	18160.5	57.4797	0.0063	99.9579	109009123	235436	0.922163	801131	4.65469e+08		2000	408	0.0004	99.9324	99.9309	0.1019	2.22	18603.4	55.8978	0.006	99.9582	109145399	251561	0.918932	805148	4.63101e+08		2010	408	0.0004	99.7634	99.7619	0.3366	2.7273	6151.22	30.8144	0.0174	99.9408	109181901	258427	0.91961	616014	3.64063e+08
1990	409	0.0011	98.4489	98.3945	1.6433	4.5178	2241.04	53.0873	0.0941	99.846	62102488	307851	0.843979	432832	2.57949e+08		2000	409	0.0011	98.3654	98.3109	1.6758	4.5723	2218.96	52.9168	0.0981	99.8436	61820507	303139	0.83767	430690	2.54985e+08		2010	409	0.0027	97.6053	88.6229	2.145	5.3584	1662.2	47.6091	0.1309	99.8075	61744148	308725	0.83642	358198	2.16999e+08
1990	410	0.001	99.3611	99.2894	0.5826	2.774	10339.7	67.9681	0.0429	99.9253	69268690	254751	0.909741	481232	4.44046e+08		2000	410	0.0012	99.296	99.2356	0.5757	2.7597	10564.5	68.1241	0.0468	99.9262	69077595	256102	0.904156	486560	4.42747e+08		2010	410	0.0008	98.7513	98.7287	1.0833	3.6341	4958.92	74.8308	0.0751	99.8897	69111352	258610	0.905597	394769	3.69225e+08
1990	411	0.0004	99.8839	99.8839	0.0934	1.7679	69528.1	44.7806	0.0096	99.9562	38837150	227766	0.840602	261693	2.46454e+08		2000	411	0.0004	99.8608	99.8608	0.1208	1.8032	55622.5	38.4766	0.0111	99.9542	39051008	187249	0.853257	259414	2.3912e+08		2010	411	0.0007	99.0309	99.0201	0.2308	1.9471	46352.4	55.6187	0.0575	99.9456	39074428	193801	0.854675	220017	2.11241e+08
1990	412	0.0003	99.4375	99.4375	0.7306	3.3038	17635.1	35.7251	0.0375	99.8766	43919805	274944	0.833315	272918	4.549e+08		2000	412	0.0003	99.3999	99.3999	0.7605	3.3459	18672.4	41.0997	0.04	99.8742	43912916	271270	0.831831	271999	4.52114e+08		2010	412	0.0003	99.4161	99.4161	0.7701	3.3505	15115.9	42.0139	0.0387	99.8743	44016099	277357	0.836518	231121	3.91972e+08
1990	413	0.0005	99.6735	99.6695	0.3911	3.0537	7117.63	43.7893	0.0243	99.9356	129673622	451804	0.909576	762071	7.43405e+08		2000	413	0.0004	99.6324	99.6302	0.4036	3.082	7173.68	43.5883	0.0269	99.9347	129786172	427689	0.911882	820087	7.88792e+08		2010	413	0.0016	99.3505	99.3304	0.5209	3.3584	6698.98	44.1233	0.0429	99.9266	129701120	464414	0.910651	620881	6.24322e+08
1990	414	0.0003	99.476	99.476	0.7587	3.4793	7617.03	31.9891	0.0344	99.9098	96116098	469501	0.872235	539713	6.61613e+08		2000	414	0.0003	99.4796	99.4795	0.7549	3.4692	7702.62	32.4193	0.0342	99.9102	95869195	448288	0.868157	580794	7.09319e+08		2010	414	0.0003	99.4455	99.4455	0.8194	3.5884	7702.66	31.788	0.0361	99.9058	95888322	489801	0.868465	450674	5.76925e+08
1990	415	0.0002	99.8412	99.8412	0.2205	2.0851	12159.7	63.0896	0.0129	99.9569	78314670	539819	0.799905	420102	6.07763e+08		2000	415	0.0002	99.8224	99.8224	0.2407	2.1232	12159.7	62.6848	0.0142	99.9554	78011906	520129	0.796676	446588	6.44026e+08		2010	415	0.0002	99.6683	99.6683	0.3645	2.3522	10990.6	63.092	0.0244	99.9462	78115291	552268	0.799475	380012	5.62982e+08
1990	416	0.0001	99.2043	99.2043	0.9732	4.7932	4519.56	62.5069	0.0515	99.8668	102029977	536441	0.835476	284639	5.96809e+08		2000	416	0.0003	99.1642	99.1641	1.001	4.8327	4259.88	63.3313	0.0539	99.8657	102058804	489590	0.836774	330935	6.76581e+08		2010	416	0.0008	98.9569	98.9545	1.0932	5.0301	4211.48	62.4654	0.0648	99.8587	102120153	519446	0.837972	260023	5.65071e+08
1990	417	0.0002	99.7417	99.7417	0.2902	2.9107	17668.1	59.8597	0.0198	99.9235	76452511	581995	0.795429	290153	5.59786e+08		2000	417	0.0002	99.7051	99.7051	0.3141	2.9574	16628.8	61.7903	0.0221	99.9216	76114690	557649	0.787697	331879	6.30131e+08		2010	417	0.0002	99.3072	99.3072	0.5775	3.4468	14878.5	62.3079	0.0461	99.9016	76135242	625306	0.788121	257017	5.05961e+08
1990	418	0.0006	99.2112	99.2103	0.8518	3.0833	15802.3	34.6366	0.0488	99.8905	46839013	154901	0.868348	139941	3.10227e+08		2000	418	0.0006	99.187	99.1861	0.8652	3.1026	17465.7	38.3527	0.0506	99.8895	46919398	129819	0.874026	167104	3.62595e+08		2010	418	0.0006	99.1205	99.1196	0.8896	3.1369	18436.2	39.1756	0.0545	99.8876	46949576	133595	0.875493	149160	3.31897e+08
1990	419	0.0005	95.4247	95.4039	1.6432	5.7148	2311.11	46.7532	0.2219	99.8438	114214448	576431	0.832131	301629	6.0849e+08		2000	419	0.0005	95.1695	95.1495	1.7712	6.0086	2174.11	44.7132	0.233	99.8336	113848894	549866	0.830054	343372	6.8621e+08		2010	419	0.0034	94.7045	94.6226	2.0358	6.6092	2151.95	43.8711	0.2518	99.8126	113786003	551033	0.829666	279874	5.80872e+08
1990	420	0.0003	99.3043	71.9795	0.7749	3.2832	71191.8	15.8578	0.043	99.9137	91647540	204142	0.8962	240426	1.15847e+09		2000	420	0.0003	99.3043	71.9795	0.7749	3.2832	71191.8	15.8578	0.043	99.9137	91678181	183790	0.898181	282080	1.34899e+09		2010	420	0.0003	99.2651	71.968	0.8112	3.3534	30510.8	19.1965	0.0465	99.9115	91723782	195171	0.899302	252351	1.23724e+09
1990	421	0.0072	92.1901	53.2121	2.9413	8.3534	6267.65	37.6847	0.2971	99.7271	85714586	108085	0.868455	174944	1.1432e+09		2000	421	0.0072	92.1902	53.2121	2.9416	8.354	6267.65	37.6833	0.2971	99.727	85978059	106125	0.87028	201635	1.29746e+09		2010	421	0.0057	92.5379	53.3254	3.0126	8.4921	6144.77	40.0738	0.2899	99.7212	85990769	113666	0.870615	187740	1.2385e+09
1990	422	0.0001	99.4393	99.4393	0.5595	3.6881	15572.7	62.6874	0.0384	99.9118	117184921	605114	0.836072	448146	1.22597e+09		2000	422	0.0001	99.3945	99.3945	0.5776	3.7322	15572.7	63.9952	0.0411	99.9103	116982231	582626	0.833616	507317	1.37325e+09		2010	422	0.0006	99.307	99.3022	0.6206	3.8216	13563.3	65.2532	0.0462	99.9074	116987252	614339	0.833429	436191	1.21495e+09
1990	423	0.0005	98.792	98.7885	1.5255	5.3816	2596.93	49.951	0.0758	99.8517	107882963	564258	0.815793	411375	9.99662e+08		2000	423	0.0004	98.7295	98.7294	1.5377	5.4087	2614.3	50.0789	0.079	99.8507	108143109	499590	0.818256	488282	1.18165e+09		2010	423	0.0009	98.5617	98.5575	1.6773	5.7151	2354.46	49.5913	0.0873	99.84	108115097	532590	0.818194	459564	1.1314e+09
1990	424	0.0003	99.4203	99.4203	0.5549	3.3057	5995.15	55.9984	0.0392	99.9144	91184261	393473	0.818344	294446	4.30842e+08		2000	424	0.0003	99.2587	99.2587	0.6188	3.4337	6221.39	53.6116	0.0478	99.9095	90980891	403673	0.814548	345469	5.02925e+08		2010	424	0.0008	98.9501	98.9448	0.8151	3.824	4958.45	46.3427	0.0628	99.8946	90974766	425349	0.814792	304928	4.57446e+08
1990	425	0.0003	98.9976	98.9975	0.8541	3.5706	4552.01	47.4366	0.0644	99.907	96683609	453145	0.870327	456195	9.39746e+08		2000	425	0.0006	98.845	98.8447	0.9485	3.776	4404.16	47.1411	0.0723	99.8992	96241509	430205	0.863464	516404	1.09933e+09		2010	425	0.0006	98.5345	98.5311	1.0972	4.068	3898.02	44.8038	0.0874	99.8885	96149961	453579	0.862181	515720	1.12544e+09
1990	426	0.0003	99.1375	99.1237	0.964	4.8577	3125.12	49.7411	0.0572	99.8699	105292371	674485	0.83289	427076	7.95097e+08		2000	426	0.0004	99.0477	99.0308	1.019	4.9774	3074.09	48.9303	0.0618	99.8661	105310111	621657	0.83723	504473	9.3351e+08		2010	426	0.0008	98.783	98.7627	1.1322	5.1982	2885.79	47.4978	0.0753	99.8581	105345909	656318	0.838203	495952	9.29141e+08
1990	427	0.0017	97.5801	97.3217	1.2847	6.3794	10280.9	43.6839	0.13	99.8489	157843576	200048	0.907179	511240	3.8185e+09		2000	427	0.0017	97.5803	97.3219	1.2845	6.3422	10281.4	43.6831	0.13	99.85	157369576	180731	0.899254	575347	4.31853e+09		2010	427	0.0013	98.3389	98.316	1.2199	6.1707	7711.03	42.863	0.0973	99.8549	157423175	192615	0.900032	542918	4.13231e+09
1990	428	0.0283	70.6301	51.8372	22.4749	34.0734	155.018	40.9991	0.701	97.6171	28508870	763990	0.38272	112064	832960		2000	428	0.028	70.516	51.795	22.5152	34.1305	155.243	40.4727	0.6996	97.609	28559481	776444	0.386687	73250.5	571893		2010	428	0.0261	67.1018	49.5119	23.1749	35.0745	154.23	42.4178	0.7309	97.4448	28499203	823213	0.3848	65656.2	515677
1990	429	0.0101	87.0639	86.678	16.9092	13.7848	139.682	39.3056	0.471	98.5507	7962089	230757	0.493408	125426	214238		2000	429	0.0164	81.9748	76.2009	19.5096	15.6135	214.633	39.497	0.584	98.2324	7643254	204125	0.470409	115476	211252		2010	429	0.0202	79.693	73.8517	20.8189	16.5344	206.25	40.0082	0.6227	98.0711	7524082	194015	0.455179	102548	186737
1990	430	0.006	95.0384	93.0679	5.4609	15.0565	494.244	59.4725	0.2268	99.5167	77955231	2.44423e+06	0.492762	242172	2.21506e+06		2000	430	0.0042	94.019	92.0698	5.7741	15.7359	472.567	59.0902	0.2619	99.4911	77544210	2.32098e+06	0.490031	212417	1.95204e+06		2010	430	0.008	90.7473	88.585	6.7619	17.8851	438.339	41.5451	0.3776	99.4089	77104067	2.37081e+06	0.485009	203153	1.86961e+06
1990	431	0.0208	88.3545	88.2888	17.9717	20.1791	124.899	34.3798	0.4115	98.3849	16325163	414021	0.516651	57234	9.96518e+06		2000	431	0.0334	84.1367	83.8862	20.1133	22.294	124.314	33.9888	0.498	98.1212	15907152	353651	0.499524	50140.1	9.11919e+06		2010	431	0.0435	72.2284	70.9436	25.0697	27.2149	129.495	34.1083	0.6686	97.3257	14871778	297568	0.445307	52756.4	1.05012e+07
1990	432	0.019	84.929	59.1512	24.2772	41.724	92.9436	19.7481	0.4808	97.8275	40400470	1.2389e+06	0.444401	137329	1.30206e+06		2000	432	0.0214	82.7276	57.1928	25.1744	43.1662	95.7681	19.9828	0.5206	97.6992	40101498	1.14684e+06	0.441747	122274	1.17098e+06		2010	432	0.0449	71.8639	49.6598	29.49	50.1477	98.5149	16.9209	0.6739	96.9486	37752133	903436	0.393887	113311	1.18424e+06
1990	433	0.0085	94.9657	94.1914	3.3094	8.6007	2798.9	13.0416	0.2061	99.6794	64920293	3260.69	0.781477	94458	1.28918e+08		2000	433	0.0085	94.9773	94.2031	3.3009	8.5843	2814.81	12.6013	0.2054	99.6802	65076630	3159.53	0.783768	113485	1.48575e+08		2010	433	0.0063	95.4645	94.5902	3.0299	8.1001	3259.21	11.3564	0.1896	99.6988	65086541	3310.35	0.783666	92124.2	1.24149e+08
1990	434	0.0005	99.9151	99.9093	0.0563	2.507	46727.1	49.4816	0.0074	99.9259	52933613	220837	0.880061	359473	3.69305e+08		2000	434	0.0005	99.9086	99.9028	0.0587	2.5107	46727.1	48.4228	0.0079	99.9257	53010836	215655	0.875958	356454	3.63611e+08		2010	434	0.0005	99.693	99.687	0.1314	2.6217	21989.4	N/A	0.0208	99.9201	53053337	222227	0.877571	294451	3.07874e+08
1990	435	0.0013	99.6608	99.645	0.4198	2.3098	5531.11	56.3624	0.0258	99.9178	29057727	141730	0.828436	154076	6.7768e+07		2000	435	0.0013	99.6388	99.623	0.4393	2.3372	5273.83	55.4994	0.0273	99.9161	29157851	137916	0.824292	175224	7.61738e+07		2010	435	0.0018	99.6271	99.6109	0.4536	2.3491	5273.83	55.4469	0.028	99.9153	29195702	150355	0.827584	135248	5.83726e+07
1990	436	0.0008	99.654	99.6344	0.5555	3.084	7416.32	46.0671	0.0257	99.9121	63118771	459222	0.832489	342231	4.11832e+08		2000	436	0.0008	99.6381	99.6186	0.5821	3.1302	7307.26	45.0765	0.0267	99.9102	62812590	438057	0.830099	388584	4.66639e+08		2010	436	0.0008	99.6216	99.602	0.6176	3.1789	6714.8	44.7708	0.0277	99.9081	62865259	464509	0.832485	288606	3.42582e+08
1990	437	0.0059	97.2149	65.98	2.5093	5.549	2007.18	45.2235	0.1434	99.7558	36793337	663863	0.666752	138653	7.538e+07		2000	437	0.0094	96.7624	65.7472	2.6987	5.8119	1754.85	47.6208	0.1644	99.7419	36586117	627920	0.665823	117343	6.18024e+07		2010	437	0.0068	96.1118	65.4735	2.8796	6.0441	1754.86	50.5895	0.1916	99.7318	36551112	645900	0.665732	134915	7.17001e+07
1990	438	0.0014	98.8615	70.855	0.9875	3.0582	7997.09	40.0147	0.0662	99.8857	37679511	95812.5	0.908378	72321.9	6.6119e+07		2000	438	0.0014	98.8584	70.852	0.9916	3.0637	7997.09	39.8845	0.0664	99.8854	37784591	92414	0.90852	104048	9.00069e+07		2010	438	0.0024	98.5156	70.5045	1.7637	4.1015	4552.24	34.1351	0.0843	99.8274	37769988	100866	0.908345	96511	8.34747e+07
1990	439	0.0093	95.344	94.7768	6.4235	11.2836	313.875	61.3712	0.2202	99.4346	33119539	211878	0.7921	112727	1.15921e+08		2000	439	0.0096	95.2041	94.6411	6.5305	11.4289	315.457	61.0009	0.2252	99.4259	33062419	210215	0.793058	104895	1.12462e+08		2010	439	0.0112	94.6515	94.0357	7.0233	12.1093	296.922	61.9989	0.2445	99.3863	33054193	229172	0.792678	128528	1.38959e+08
1990	440	0.0008	97.2711	97.2243	4.0588	7.2209	447.716	67.1956	0.1438	99.6222	32075737	206390	0.856546	229902	1.32082e+08		2000	440	0.0016	97.3882	97.3286	3.9475	7.0777	443.79	66.4785	0.139	99.6316	31981716	208566	0.853578	236005	1.39181e+08		2010	440	0.0036	96.7646	96.6765	4.7083	8.0228	423.018	69.0969	0.1653	99.5742	31989807	216157	0.854058	385105	2.46057e+08
1990	441	0.0006	98.3483	98.347	3.033	8.7685	662.848	38.4438	0.0957	99.7351	100844178	398630	0.897866	752839	2.1431e+08		2000	441	0.0008	98.3187	98.3094	3.0916	8.8972	656.257	37.9914	0.0969	99.7306	100906825	397826	0.895959	763532	2.19415e+08		2010	441	0.0005	98.2037	98.1947	3.2063	9.0783	677.038	37.5956	0.1021	99.7241	100868943	422844	0.895239	855465	2.48551e+08
1990	442	0.0024	98.1604	98.1205	2.6036	7.3952	922.143	42.3513	0.1046	99.7798	98996051	446248	0.881153	636936	3.66847e+08		2000	442	0.002	98.034	98.0047	2.6946	7.5863	905.717	42.7636	0.1104	99.7737	99141583	420995	0.884156	630106	3.66154e+08		2010	442	0.0042	97.3067	97.1208	2.8459	7.8165	934.681	44.0255	0.1413	99.7662	98880186	458716	0.87966	735560	4.35316e+08
1990	443	0.001	98.6217	98.6058	2.6415	7.4515	575.228	40.0702	0.0827	99.7678	90443590	435226	0.876386	543661	4.37778e+08		2000	443	0.0011	98.5847	98.5681	2.6858	7.5354	566.934	40.5117	0.0846	99.7647	90784488	439728	0.876112	519505	4.11793e+08		2010	443	0.0025	98.1771	98.1457	3.5663	9.3706	509.753	36.8603	0.1033	99.6972	90744943	453574	0.875965	594484	4.85837e+08
1990	444	0.0012	97.6288	97.6075	4.488	11.4591	360.983	42.4127	0.1294	99.6141	87180044	602508	0.833421	529858	1.72544e+08		2000	444	0.0016	97.5421	97.5161	4.5438	11.5718	359.095	42.344	0.1333	99.6095	87216241	587653	0.836815	540559	1.71761e+08		2010	444	0.0041	96.8904	96.5129	5.7167	13.9838	333.301	39.5659	0.1604	99.5177	87109776	608368	0.836564	582172	1.88793e+08
1990	445	0.0085	93.3017	92.484	5.5461	10.2842	1770.46	12.2971	0.2574	99.4877	38026648	622996	0.741555	55466.9	3.0327e+07		2000	445	0.0085	93.2971	92.4793	5.5545	10.2963	1751.53	12.7921	0.2579	99.487	38077129	632384	0.743079	56841.3	3.07405e+07		2010	445	0.0116	92.6837	91.1086	6.0126	10.9496	1605.57	18.5662	0.2814	99.4503	38077129	695123	0.743079	62284.4	3.42796e+07
1990	446	0.0067	93.1008	92.7584	8.5644	11.4639	319.943	36.096	0.2793	99.271	19597950	553288	0.473768	37518.5	432597		2000	446	0.0113	87.5471	84.7951	14.7154	18.2403	194.594	25.4168	0.4106	98.7102	19023139	569415	0.447374	31189.6	373673		2010	446	0.0196	83.3699	80.4444	16.5959	20.3119	189.838	14.6075	0.4855	98.4993	18892297	579034	0.442519	32823.4	395430
1990	447	0.0041	83.1971	79.086	20.8747	40.6004	90.4601	22.3639	0.5077	98.068	49895120	1.53033e+06	0.427194	90772.9	947361		2000	447	0.0037	82.4662	78.3972	21.2776	41.3368	90.3533	21.9611	0.5197	98.0146	49850909	1.49415e+06	0.429651	103037	1.06219e+06		2010	447	0.0056	82.0341	77.9341	21.4481	41.649	91.479	21.6329	0.5265	97.9888	49779303	1.61786e+06	0.428647	76912.3	825441
1990	448	0.0012	99.3267	99.3077	0.4798	2.0135	5441.52	40.5715	0.0434	99.93	23917015	9169.33	0.891338	57897.7	1.70706e+08		2000	448	0.0012	99.3268	99.3077	0.4798	2.0135	5441.52	40.5715	0.0434	99.93	23805319	12699.8	0.890737	60099	1.76438e+08		2010	448	0.0006	99.4384	99.4384	0.4482	1.9814	5441.49	41.7119	0.0376	99.932	23805319	13117.8	0.890737	50173.5	1.54013e+08
1990	449	0.0063	86.5825	86.4527	6.6302	19.2453	1396.87	18.2732	0.4207	99.4019	126745091	38069.1	0.787518	170000	8.50137e+08		2000	449	0.0063	86.5825	86.4526	6.6304	19.2388	1396.88	18.2725	0.4207	99.4022	126362886	36515.2	0.782736	186972	9.19808e+08		2010	449	0.0067	86.7367	86.6053	6.5613	19.0323	1413.04	18.5687	0.4185	99.4109	126368931	39541.4	0.782831	152173	7.90809e+08
1990	450	0.0012	98.7396	98.7377	2.0247	4.7198	1218.47	52.399	0.079	99.8066	44347935	190987	0.893699	300826	1.65373e+08		2000	450	0.0012	98.8027	98.8008	1.9151	4.6057	1328.58	45.9356	0.0741	99.8125	44427275	187450	0.893952	299227	1.61217e+08		2010	450	0.0018	98.0179	98.0136	2.7097	5.7096	1085.27	44.7238	0.1112	99.7554	44208835	193679	0.888374	455453	2.67836e+08
1990	451	0.0068	97.2467	97.2112	3.9538	6.6412	446.853	32.4431	0.1451	99.5442	16290662	170167	0.78229	85363.9	6.75653e+07		2000	451	0.006	96.7385	96.7038	4.1284	6.786	428.06	28.5397	0.1634	99.5291	16553277	142452	0.808025	71959.2	5.53287e+07		2010	451	0.006	95.0187	94.9901	5.9033	8.4142	333.243	22.8276	0.227	99.3882	16356616	141506	0.794697	90172.3	7.32715e+07
1990	452	0.0107	94.6853	94.5034	5.8435	11.0773	416.804	47.6084	0.2388	99.4147	31252007	378346	0.733977	218512	1.40263e+08		2000	452	0.0111	93.7721	93.5877	6.1961	11.5234	422.175	46.4547	0.267	99.3824	31054541	354225	0.732238	186582	1.11676e+08		2010	452	0.0225	88.9837	88.6492	9.3207	15.5067	357.72	25.3963	0.3938	99.1018	30359263	299619	0.710975	229731	1.48792e+08
1990	453	0.0066	97.3334	97.0871	3.0796	5.8273	916.596	42.0531	0.1407	99.6901	25831359	191461	0.832998	215145	1.8791e+08		2000	453	0.0071	97.0084	96.7848	3.3429	6.1078	864.021	39.5853	0.1531	99.67	25935075	179963	0.832669	176676	1.47664e+08		2010	453	0.0109	94.8065	94.6405	5.2091	8.244	616.597	25.8488	0.2292	99.5201	25754501	170268	0.825116	225494	2.01813e+08
1990	454	0.0004	99.8979	99.8979	0.1687	2.0411	15240.6	60.5982	0.0088	99.9403	35049042	254872	0.820187	98546.7	4.46015e+08		2000	454	0.0004	99.8834	99.8834	0.1733	2.0474	15240.6	61.5485	0.0098	99.9399	35075380	254281	0.824108	136492	6.21231e+08		2010	454	0.0004	99.8465	99.8465	0.2268	2.0965	10973.5	68.9739	0.0125	99.9373	35150059	266106	0.828492	118555	5.3049e+08
1990	455	0.002	99.4956	99.4393	0.641	2.1274	4508.12	61.2695	0.0345	99.8954	12706227	52545.1	0.877295	30820	1.65426e+07		2000	455	0.002	99.4744	99.4181	0.6869	2.1631	4132.45	63.8078	0.0359	99.8919	12689900	48265.2	0.882203	43003.6	2.22721e+07		2010	455	0.002	99.1965	99.1383	1.1195	2.4969	3199.3	64.9927	0.052	99.8606	12689900	53515.9	0.882203	39380.7	2.05314e+07
1990	456	0.0028	94.0489	60.8752	3.5516	7.5637	2871.88	45.0305	0.2438	99.6946	59749160	275235	0.872442	115780	9.17913e+07		2000	456	0.0028	94.3282	61.1588	3.4166	7.3304	2769.92	47.7809	0.2373	99.7067	59673683	279922	0.866403	167911	1.29501e+08		2010	456	0.0073	92.4494	59.4601	4.883	9.811	1727.4	61.9661	0.3062	99.5854	59543090	310074	0.86603	145376	1.11915e+08
1990	457	0.0077	93.871	93.7971	7.8432	14.7002	358.833	42.6994	0.2704	99.3352	48054756	774200	0.695843	154044	1.05902e+07		2000	457	0.0072	93.7274	93.6545	7.8861	14.7644	357.293	42.9291	0.2762	99.3316	47989212	750513	0.697186	187470	1.29595e+07		2010	457	0.0106	92.8342	51.2808	9.0021	16.5359	325.429	44.6103	0.3074	99.2413	47918117	828671	0.696316	164733	1.11158e+07
1990	458	0.0169	83.3404	73.5202	12.5212	28.8866	201.232	54.0467	0.563	98.8982	80304538	1.34913e+06	0.670508	281363	3.62427e+07		2000	458	0.0214	82.2572	72.9208	12.94	29.7829	199.094	54.3829	0.5895	98.8556	80109525	1.24668e+06	0.675093	292397	3.96007e+07		2010	458	0.0339	78.7537	65.2252	14.4589	33.0422	190.882	56.0168	0.6736	98.6926	79642769	1.29137e+06	0.670652	305570	3.81803e+07
1990	459	0.008	96.6338	96.513	3.9552	6.28	1245.35	28.3684	0.161	99.6544	29095853	135337	0.902351	243787	7.74354e+07		2000	459	0.0071	96.7151	96.5947	3.8726	6.1763	1259.35	42.8117	0.1571	99.6605	29015955	127335	0.903349	262946	8.34014e+07		2010	459	0.0085	95.7577	95.2737	4.756	7.1889	1342.36	51.6574	0.1991	99.5926	28992216	131641	0.903237	410260	1.40175e+08
1990	460	0.0016	96.8128	96.7793	4.4493	11.3292	463.431	44.9472	0.1647	99.6352	94433835	635176	0.842486	673855	4.13043e+08		2000	460	0.0015	96.4975	96.4626	4.6443	11.7493	463.432	45.2735	0.1776	99.62	94354402	621425	0.840777	695005	4.39663e+08		2010	460	0.0044	95.0896	57.5392	5.3948	13.3556	457.484	45.8517	0.2306	99.5606	94048939	656398	0.837767	1.11865e+06	7.55221e+08
1990	461	0.0005	99.4866	99.4865	0.9109	3.5301	8364.39	29.0466	0.0345	99.8868	57126518	367917	0.837403	260140	6.69168e+08		2000	461	0.0005	99.4136	99.4124	0.9794	3.6372	7036.74	35.9843	0.0397	99.8823	56919575	371217	0.83246	358420	9.24917e+08		2010	461	0.0014	98.7859	98.781	1.2864	4.1105	5277.67	41.4542	0.0735	99.8619	56857383	393512	0.833246	312491	7.9923e+08
1990	462	0.0003	99.6457	99.6457	0.5829	3.1021	5385.95	50.3975	0.027	99.8981	51453191	85795.5	0.962403	454455	7.52961e+08		2000	462	0.0003	99.617	99.617	0.6263	3.1655	4966.28	53.6769	0.029	99.8951	51363752	82815.6	0.961859	423208	6.82007e+08		2010	462	0.0005	97.5896	97.5887	2.6606	6.3056	2317.6	43.9088	0.129	99.7379	51330682	83815.8	0.961325	569955	9.92321e+08
1990	463	0.0073	96.5828	96.3609	4.8254	10.8551	394.489	36.1994	0.1724	99.4765	37738071	297194	0.823251	183181	1.45084e+08		2000	463	0.008	95.6574	95.4293	5.4392	11.6945	361.379	33.7554	0.2053	99.4257	37543348	260879	0.821006	154155	1.23353e+08		2010	463	0.0116	92.0907	91.8149	8.3103	15.644	274.046	30.5812	0.3268	99.1983	36931414	250634	0.806214	185022	1.55086e+08
1990	464	0.0293	68.2347	44.9501	25.8591	28.1424	121.017	56.9712	0.8418	97.1834	15149031	422890	0.520996	34267.1	462119		2000	464	0.0316	67.176	43.9064	26.2369	28.528	122.343	58.3469	0.8573	97.1171	15261936	407061	0.523124	24797	337108		2010	464	0.0304	64.9607	42.73	26.7791	29.0724	123.335	56.7231	0.8899	96.959	15177960	429837	0.519482	27527	377300
1990	465	0.0021	97.7443	73.6412	3.9019	8.1854	476.269	40.7784	0.1231	99.666	54801902	269930	0.868434	408227	1.62063e+08		2000	465	0.0021	97.6699	73.5925	3.9507	8.2619	475.733	41.2382	0.1266	99.6625	54793985	275651	0.868749	436641	1.7323e+08		2010	465	0.0021	97.3525	73.3859	4.2093	8.6694	477.35	41.2175	0.1402	99.642	54773478	299894	0.868214	505035	2.01556e+08
1990	466	0.0123	77.4969	58.8648	11.2436	17.22	221.387	52.7338	0.6458	98.8759	31387465	376261	0.736376	187789	4.78403e+07		2000	466	0.0119	77.3872	58.8594	11.1891	17.1446	223.409	52.1203	0.6472	98.878	31563963	371998	0.741552	141905	3.57724e+07		2010	466	0.0167	75.81	57.4934	12.3209	18.6529	217.455	57.2242	0.7028	98.778	31570725	390961	0.7422	236118	6.25358e+07
1990	467	0.0061	95.2203	58.8398	5.5756	10.2621	409.445	49.2154	0.2278	99.527	43417780	447488	0.762026	310482	2.70551e+07		2000	467	0.007	94.9763	58.6668	5.8369	10.6533	397.175	49.5207	0.2369	99.5072	43593931	433583	0.771781	323283	2.76581e+07		2010	467	0.0212	93.2648	58.2084	7.3757	12.9515	366.655	46.6792	0.2939	99.3829	43473548	449030	0.76939	347983	3.05849e+07
1990	468	0.0027	96.9465	87.5564	4.4878	7.6085	437.277	46.0137	0.1623	99.6059	31258383	416752	0.720654	159486	3.35828e+07		2000	468	0.0031	96.6713	87.2893	4.5766	7.7149	438.749	45.7412	0.1733	99.5985	31099996	405366	0.716649	155964	3.25434e+07		2010	468	0.013	95.0445	85.4148	6.9126	10.6878	387.9	43.0708	0.2334	99.4134	30962630	430544	0.712418	159664	3.40462e+07
1990	469	0.0019	97.8691	49.5148	3.0061	5.6974	1098.91	49.2155	0.1123	99.7192	34572332	95268.5	0.908294	197965	1.15519e+08		2000	469	0.0019	97.8687	49.5145	3.0056	5.6924	1113.06	49.2298	0.1123	99.7195	34482895	107031	0.901236	190053	1.10785e+08		2010	469	0.0023	97.0792	48.7441	2.8203	5.4351	1764.25	37.9673	0.1458	99.7342	34447761	112623	0.901999	228093	1.35628e+08
1990	470	0.0143	71.9188	33.7753	10.8738	26.8302	362.729	52.7305	0.7368	98.9152	82347840	1.35636e+06	0.70908	366654	4.65043e+07		2000	470	0.0147	71.6271	33.5247	10.9881	27.0852	361.111	52.9081	0.7456	98.8995	82538668	1.28152e+06	0.711005	351712	4.33925e+07		2010	470	0.0114	71.9385	33.0193	11.9026	29.1339	346.881	57.2299	0.8017	98.8272	82345080	1.34391e+06	0.710874	446770	5.78716e+07
1990	471	0.0035	96.1033	80.9389	2.554	5.8825	1313.83	52.4448	0.1916	99.7485	41445107	154274	0.904657	175247	1.0488e+08		2000	471	0.0057	95.5796	80.3421	2.8342	6.2715	1271.28	52.2173	0.2121	99.7266	41181343	158884	0.901479	231919	1.38015e+08		2010	471	0.0092	94.1233	79.1232	4.2216	8.2022	1057.27	76.3933	0.2634	99.6174	41108399	163729	0.899894	196741	1.1164e+08
1990	472	0.0004	99.9263	99.9263	0.1011	2.4399	24511.3	49.8751	0.0064	99.9126	31758662	248629	0.787256	107551	5.75926e+07		2000	472	0.0004	99.901	99.901	0.1045	2.4562	24510.6	49.0329	0.0082	99.9116	31890293	253235	0.781144	120773	6.43786e+07		2010	472	0.0004	99.0637	99.0637	1.1613	3.7293	2953.26	11.8846	0.0537	99.8329	31914008	298882	0.783197	101893	5.60096e+07
1990	473	0.003	97.8373	97.8162	1.5649	3.7389	2245.92	49.3311	0.1193	99.8297	31010070	190043	0.789612	93846.3	2.45747e+08		2000	473	0.0055	97.6269	97.5883	1.652	3.844	2358.22	44.9907	0.1288	99.8227	30765127	193657	0.782232	75428.7	1.99394e+08		2010	473	0.0042	97.1592	97.1269	1.6532	3.8405	2334.86	45.7897	0.1497	99.8226	30763467	204004	0.782641	74580.4	2.04515e+08
1990	474	0.0057	83.0607	82.8495	20.2527	46.7204	86.7168	32.7519	0.5575	98.1322	70777133	1.93975e+06	0.487224	151729	3.88658e+06		2000	474	0.0057	82.7957	82.5847	20.4689	47.1921	86.658	32.5179	0.5626	98.107	70589226	1.88958e+06	0.48622	161200	3.84059e+06		2010	474	0.0077	81.9929	81.5157	20.9355	48.2099	87.7506	35.1314	0.5791	98.0524	70428491	2.03488e+06	0.483828	162818	4.37738e+06
1990	475	0.0301	77.5811	25.1283	20.2936	43.0644	153.53	52.872	0.7069	98.0825	60763230	1.51084e+06	0.532949	166009	4.55166e+06		2000	475	0.0335	76.4768	24.9942	20.6228	43.7071	154.558	50.9047	0.7214	98.0228	60132875	1.47421e+06	0.532246	172460	5.08683e+06		2010	475	0.0455	73.7023	24.3011	21.6824	45.7733	155.138	50.2123	0.7684	97.8633	59600537	1.49808e+06	0.5287	178219	4.91728e+06
1990	476	0.0015	98.3426	91.3873	2.8944	6.1359	573.571	43.3699	0.0968	99.7315	39752859	284224	0.829439	244080	1.95385e+08		2000	476	0.0018	98.2263	91.297	2.9942	6.2804	564.866	43.3539	0.1022	99.7236	39532655	286798	0.825876	227139	1.8257e+08		2010	476	0.0051	97.6155	90.6181	4.1814	7.9961	505.228	39.8649	0.1296	99.6315	39523848	298147	0.826599	244670	1.98092e+08
